# Supplementary material for: Isotypes of autoantibodies against novel differential 4-hydroxy-2-nonenal-modified peptide adducts in serum is associated with rheumatoid arthritis in Taiwanese women
Source: BMC Med Inform Decis Mak. 2021 Feb 10;21:49. doi: 10.1186/s12911-020-01380-y (PMC7874460; doi:10.1186/s12911-020-01380-y)
Supplement: Supplementary file 5 — Additional file 5: Table S2. Sequences of unmodified and 4-hydroxy-2-nonenal (HNE)-modified peptides. [file 12911_2020_1380_MOESM5_ESM.xlsx]

## Sheet: 工作表1
Supplementary Table 2
Protein Group	Protein ID	Protein Accession	Peptide	Unique	-10lgP	Mass	ppm	m/z	z	RT	Scan	#Spec	Start	End	PTM
HC1
1	1	P01024|CO3_HUMAN	R.VPVAVQGEDTVQSLTQGDGVAK.L	Y	200	2197.12	-1.3	1099.57	2	47.81	F19:5140	11	387	408
1	1	P01024|CO3_HUMAN	R.ILLQGTPVAQMTEDAVDAER.L	Y	149.81	2156.08	1.2	1079.05	2	60.24	F18:7713	20	980	999
1	1	P01024|CO3_HUMAN	R.ILLQGTPVAQM(+15.99)TEDAVDAER.L	Y	144.06	2172.07	-0.9	1087.04	2	60.36	F18:7728	13	980	999	Oxidation (M)
1	1	P01024|CO3_HUMAN	K.ADIGC(+105.06)TPGSGKDYAGVFSDAGLTFTSSSGQQTAQR.A	Y	128.65	3584.65	-1.5	1195.89	3	50.21	F19:5419	26	623	657	S-pyridylethylation
1	1	P01024|CO3_HUMAN	R.SNLDEDIIAEENIVSR.S	Y	126.17	1815.88	1.2	908.951	2	49.26	F19:5311	173	749	764
1	1	P01024|CO3_HUMAN	R.IPIEDGSGEVVLSR.K	Y	125.64	1469.77	-0.2	735.893	2	41.96	F19:4474	65	291	304
1	1	P01024|CO3_HUMAN	K.VQLSNDFDEYIMAIEQTIK.S	Y	123.14	2256.1	2.6	1129.06	2	79.57	F18:9780	21	1552	1570
1	1	P01024|CO3_HUMAN	R.SYTVAIAGYALAQMGR.L	Y	115.04	1670.85	-0.1	836.43	2	62.59	F20:5338	54	1186	1201
1	1	P01024|CO3_HUMAN	K.VQLSNDFDEYIM(+15.99)AIEQTIK.S	Y	114.19	2272.09	2	1137.06	2	78.71	F18:9700	8	1552	1570	Oxidation (M)
1	1	P01024|CO3_HUMAN	K.SLYVSATVILHSGSDMVQAER.S	Y	114	2262.13	-1.3	755.05	3	59.58	F20:5059	168	323	343
1	1	P01024|CO3_HUMAN	R.EPGQDLVVLPLSITTDFIPSFR.L	Y	111.17	2443.3	-1.5	1222.66	2	82.37	F18:10017	8	509	530
1	1	P01024|CO3_HUMAN	R.LVAYYTLIGASGQR.E	Y	108.73	1510.81	-0.9	756.414	2	52.26	F19:5669	24	531	544
1	1	P01024|CO3_HUMAN	R.VELLHNPAFC(+105.06)SLATTK.R	Y	107.9	1847.96	-0.3	924.987	2	44.27	F18:5551	12	864	879	S-pyridylethylation
1	1	P01024|CO3_HUMAN	R.SEETKENEGFTVTAEGK.G	Y	105.88	1854.85	-0.3	928.431	2	27.55	F20:2253	45	1321	1337
1	1	P01024|CO3_HUMAN	K.LMNIFLKDSITTWEILAVSMSDKK.G	Y	98.96	2782.46	-0.1	928.495	3	82.26	F19:8769	22	790	813
1	1	P01024|CO3_HUMAN	K.SLYVSATVILHSGSDM(+15.99)VQAER.S	Y	95.68	2278.13	-1.4	760.382	3	60.17	F20:5113	32	323	343	Oxidation (M)
1	1	P01024|CO3_HUMAN	R.SEFPESWLWNVEDLKEPPK.N	Y	95.51	2329.13	1.5	1165.57	2	63.94	F18:8176	7	765	783
1	1	P01024|CO3_HUMAN	K.EDIPPADLSDQVPDTESETR.I	Y	91.66	2213	0.8	1107.51	2	40.66	F17:5854	4	960	979
1	1	P01024|CO3_HUMAN	R.HQQTVTIPPK.S	Y	91.43	1147.63	-0.6	574.824	2	15.58	F18:1382	55	882	891
1	1	P01024|CO3_HUMAN	R.TMQALPYSTVGNSNNYLHLSVLR.T	Y	91.21	2577.3	1	1289.66	2	56.5	F16:9026	7	440	462
1	1	P01024|CO3_HUMAN	R.SGIPIVTSPYQIHFTK.T	Y	90.87	1786.96	-0.2	894.488	2	52.27	F17:7802	14	344	359
1	1	P01024|CO3_HUMAN	K.SGSDEVQVGQQR.T	Y	90.01	1288.6	-0.7	645.307	2	9.55	F18:901	9	1571	1582
1	1	P01024|CO3_HUMAN	K.AC(+105.06)EPGVDYVYKTR.L	Y	89.26	1604.77	3.3	803.393	2	29.34	F18:3276	11	1536	1548	S-pyridylethylation
1	1	P01024|CO3_HUMAN	K.AAVYHHFISDGVRK.S	Y	87.88	1598.83	-1.5	800.422	2	25.37	F18:2671	11	914	927
1	1	P01024|CO3_HUMAN	R.SGIPIVTSPYQIHFTKTPK.Y	Y	87.75	2113.16	0.6	1057.59	2	47.42	F16:7364	7	344	362
1	1	P01024|CO3_HUMAN	R.AEDLVGKSLYVSATVILHSGSDMVQAER.S	Y	87.47	2974.51	0.2	992.51	3	68.1	F17:10261	7	316	343
1	1	P01024|CO3_HUMAN	K.VQLSNDFDEYIMAIEQTIKSGSDEVQVGQQR.T	Y	86.8	3526.69	1.5	1176.57	3	78.39	F18:9674	11	1552	1582
1	1	P01024|CO3_HUMAN	R.SYTVAIAGYALAQM(+15.99)GR.L	Y	86.47	1686.84	2.2	844.429	2	62.08	F19:6824	3	1186	1201	Oxidation (M)
1	1	P01024|CO3_HUMAN	R.EGVQKEDIPPADLSDQVPDTESETR.I	Y	86.38	2754.28	-1	1378.15	2	38.59	F17:5486	18	955	979
1	1	P01024|CO3_HUMAN	K.RIPIEDGSGEVVLSR.K	Y	86.23	1625.87	-1.2	813.943	2	39.58	F19:4188	29	290	304
1	1	P01024|CO3_HUMAN	K.VRVELLHNPAFC(+105.06)SLATTK.R	Y	84.87	2103.13	0.2	702.051	3	45.3	F18:5695	6	862	879	S-pyridylethylation
1	1	P01024|CO3_HUMAN	R.LVKVQLSNDFDEYIMAIEQTIKSGSDEVQVGQQR.T	Y	82.93	3866.94	0.7	1289.99	3	76.72	F17:11386	7	1549	1582
1	1	P01024|CO3_HUMAN	K.GQGTLSVVTM(+15.99)YHAK.A	Y	82.66	1506.75	2.1	754.384	2	39.4	F20:3235	7	1338	1351	Oxidation (M)
1	1	P01024|CO3_HUMAN	K.SDDKVTLEERLDK.A	Y	82.19	1546.78	0.8	774.4	2	29.68	F19:2956	76	1523	1535
1	1	P01024|CO3_HUMAN	R.TKKQELSEAEQATR.T	Y	81.87	1617.83	-0.5	809.923	2	17.67	F17:1812	18	426	439
1	1	P01024|CO3_HUMAN	R.LVKVQLSNDFDEYIM(+15.99)AIEQTIK.S	Y	81.54	2612.34	0.3	871.788	3	76.26	F19:8273	9	1549	1570	Oxidation (M)
1	1	P01024|CO3_HUMAN	R.IPIEDGSGEVVLSRK.V	Y	81.48	1597.87	-0.2	799.941	2	36.98	F17:5183	10	291	305
1	1	P01024|CO3_HUMAN	R.RHQQTVTIPPK.S	Y	79.64	1303.74	-0.5	435.586	3	19.94	F18:1867	31	881	891
1	1	P01024|CO3_HUMAN	K.SSLSVPYVIVPLKTGLQEVEVK.A	Y	79.05	2384.36	0.7	1193.19	2	62.07	F18:7945	12	892	913
1	1	P01024|CO3_HUMAN	K.DYAGVFSDAGLTFTSSSGQQTAQR.A	Y	78.99	2493.14	-1.3	832.053	3	57.25	F20:4827	6	634	657
1	1	P01024|CO3_HUMAN	K.YFKPGMPFDLMVFVTNPDGSPAYR.V	Y	78.93	2748.31	2.8	1375.16	2	72.66	F16:11635	4	363	386
1	1	P01024|CO3_HUMAN	K.VQLSNDFDEYIM(+15.99)AIEQTIKSGSDEVQVGQQR.T	Y	78.65	3542.68	-1.1	1181.9	3	77.78	F18:9621	8	1552	1582	Oxidation (M)
1	1	P01024|CO3_HUMAN	R.LESEETM(+15.99)VLEAHDAQGDVPVTVTVHDFPGKK.L	Y	77.69	3393.64	-0.3	1132.22	3	49.12	F17:7297	8	36	66	Oxidation (M)
1	1	P01024|CO3_HUMAN	R.LDKAC(+105.06)EPGVDYVYK.T	Y	77.15	1703.82	-0.5	852.918	2	31.84	F17:4257	8	1533	1546	S-pyridylethylation
1	1	P01024|CO3_HUMAN	K.AAVYHHFISDGVR.K	Y	77.09	1470.74	0.5	736.376	2	30.88	F17:4089	13	914	926
1	1	P01024|CO3_HUMAN	K.LSINTHPSQKPLSITVR.T	Y	76.33	1890.07	-0.1	946.042	2	37.58	F17:5301	16	409	425
1	1	P01024|CO3_HUMAN	K.GYTQQLAFRQPSSAFAAFVK.R	Y	75.71	2216.14	1.7	1109.08	2	56.15	F16:8967	6	1052	1071
1	1	P01024|CO3_HUMAN	K.GQGTLSVVTMYHAK.A	Y	74.88	1490.76	3.9	746.388	2	39.16	F19:4137	21	1338	1351
1	1	P01024|CO3_HUMAN	K.TGLQEVEVK.A	Y	73.74	1001.54	-1.1	501.776	2	30.2	F18:3429	8	905	913
1	1	P01024|CO3_HUMAN	R.LESEETMVLEAHDAQGDVPVTVTVHDFPGK.K	Y	73.6	3249.55	0.1	1084.19	3	51.91	F16:8214	16	36	65
1	1	P01024|CO3_HUMAN	K.SGQSEDRQPVPGQQMTLK.I	Y	73.27	1984.96	-1	993.488	2	29.74	F19:2964	5	567	584
1	1	P01024|CO3_HUMAN	K.DMALTAFVLISLQEAKDIC(+105.06)EEQVNSLPGSITK.A	Y	73.23	3567.82	2.4	1190.28	3	86.18	F17:12531	4	1140	1171	S-pyridylethylation
1	1	P01024|CO3_HUMAN	R.LVKVQLSNDFDEYIMAIEQTIK.S	Y	72.8	2596.35	1.9	866.457	3	76.84	F18:9536	13	1549	1570
1	1	P01024|CO3_HUMAN	R.AYYENSPQQVFSTEFEVK.E	Y	72.74	2165	0.4	1083.51	2	55.24	F16:8810	7	208	225
1	1	P01024|CO3_HUMAN	R.HQQTVTIPPKSSLSVPYVIVPLK.T	Y	72.7	2530.45	1.5	844.493	3	53.13	F18:6763	5	882	904
1	1	P01024|CO3_HUMAN	R.SEFPESWLWNVEDLK.E	Y	72.24	1877.88	0.2	939.949	2	70.17	F18:8871	2	765	779
1	1	P01024|CO3_HUMAN	K.SDDKVTLEERLDKAC(+105.06)EPGVDYVYK.T	Y	70.89	2876.39	-0.4	959.804	3	42.89	F18:5353	9	1523	1546	S-pyridylethylation
1	1	P01024|CO3_HUMAN	K.AC(+105.06)EPGVDYVYK.T	Y	70.62	1347.62	-0.4	674.816	2	31.48	F17:4190	10	1536	1546	S-pyridylethylation
1	1	P01024|CO3_HUMAN	R.LGREGVQKEDIPPADLSDQVPDTESETR.I	Y	70.59	3080.49	0	1027.84	3	37.53	F16:5433	3	952	979
1	1	P01024|CO3_HUMAN	R.NNNEKDMALTAFVLISLQEAKDIC(+105.06)EEQVNSLPGSITK.A	Y	70.56	4167.09	-0.4	1390.04	3	79.66	F17:11767	5	1135	1171	S-pyridylethylation
1	1	P01024|CO3_HUMAN	R.LESEETMVLEAHDAQGDVPVTVTVHDFPGKK.L	Y	69.97	3377.64	-1.5	1126.89	3	49.14	F17:7300	21	36	66
1	1	P01024|CO3_HUMAN	K.KQELSEAEQATR.T	Y	69.11	1388.69	-0.9	695.351	2	19.67	F17:2116	7	428	439
1	1	P01024|CO3_HUMAN	K.QC(+105.06)QDLGAFTESMVVFGC(+105.06)PN	Y	68.64	2254.98	1.7	1128.5	2	58.54	F17:8823	21	1645	1663	S-pyridylethylation
1	1	P01024|CO3_HUMAN	R.KVLLDGVQNPR.A	Y	68.01	1237.71	0.4	619.865	2	30.08	F17:3938	11	305	315
1	1	P01024|CO3_HUMAN	R.VVLVAVDKGVFVLNKK.N	Y	67.9	1727.07	-1.8	576.697	3	50.42	F19:5444	214	593	608
1	1	P01024|CO3_HUMAN	K.SGQSEDRQPVPGQQMTLKIEGDHGAR.V	Y	67.73	2820.36	-1.2	941.125	3	33.2	F16:4564	3	567	592
1	1	P01024|CO3_HUMAN	K.QELSEAEQATR.T	Y	67.65	1260.59	-0.4	631.304	2	23.25	F17:2736	5	429	439
1	1	P01024|CO3_HUMAN	K.SLKVVPEGIR.M	Y	67.63	1096.66	-1.5	549.337	2	32.57	F18:3799	9	928	937
1	1	P01024|CO3_HUMAN	R.QVREPGQDLVVLPLSITTDFIPSFR.L	Y	67.62	2826.53	0.4	1414.27	2	76.13	F16:12109	6	506	530
1	1	P01024|CO3_HUMAN	R.TVMVNIENPEGIPVK.Q	Y	67.55	1638.87	-0.9	820.439	2	47.83	F16:7441	2	162	176
1	1	P01024|CO3_HUMAN	R.WEDPGKQLYNVEATSYALLALLQLKDFDFVPPVVR.W	Y	67.44	4034.12	2.2	1345.72	3	90.42	F17:13024	7	1220	1254
1	1	P01024|CO3_HUMAN	K.VLLDGVQNPRAEDLVGK.S	Y	66.93	1821.99	0.3	912.005	2	42.81	F16:6480	4	306	322
1	1	P01024|CO3_HUMAN	R.YYGGGYGSTQATFMVFQALAQYQK.D	Y	66.66	2678.25	0	893.756	3	73.51	F19:8036	2	1261	1284
1	1	P01024|CO3_HUMAN	R.SEFPESWLWNVEDLKEPPKNGISTK.L	Y	66.64	2929.45	1.2	977.492	3	59.54	F18:7621	8	765	789
1	1	P01024|CO3_HUMAN	K.HLIVTPSGC(+105.06)GEQNMIGMTPTVIAVHYLDETEQWEK.F	Y	66.4	4030.93	0.3	1344.65	3	64.49	F16:10379	6	1002	1036	S-pyridylethylation
1	1	P01024|CO3_HUMAN	R.TELRPGETLNVNFLLR.M	Y	66.36	1871.03	-0.2	624.683	3	57.21	F17:8609	13	463	478
1	1	P01024|CO3_HUMAN	K.VLLDGVQNPR.A	Y	66.02	1109.62	-0.7	555.817	2	34.95	F17:4819	6	306	315
1	1	P01024|CO3_HUMAN	K.VTIKPAPETEKRPQDAK.N	Y	65.94	1907.05	-1.4	954.53	2	17.44	F17:1778	9	1365	1381
1	1	P01024|CO3_HUMAN	R.AVLYNYRQNQELK.V	Y	65.93	1637.85	0.7	819.934	2	32	F18:3703	3	849	861
1	1	P01024|CO3_HUMAN	K.RIPIEDGSGEVVLSRK.V	Y	65.78	1753.97	-1.4	585.663	3	34.79	F16:4872	8	290	305
1	1	P01024|CO3_HUMAN	R.HQQTVTIPPKSSLSVPYVIVPLKTGLQEVEVK.A	Y	65.7	3513.98	1.2	1172.34	3	57.57	F18:7365	8	882	913
1	1	P01024|CO3_HUMAN	K.AGDFLEANYM(+15.99)NLQR.S	Y	64.75	1656.76	-1	829.385	2	47.59	F17:7032	4	1172	1185	Oxidation (M)
1	1	P01024|CO3_HUMAN	K.GYTQQLAFRQPSSAFAAFVKR.A	Y	64.49	2372.24	0.1	791.754	3	52.28	F16:8278	2	1052	1072
1	1	P01024|CO3_HUMAN	K.SSLSVPYVIVPLK.T	Y	63.69	1400.83	-0.1	701.421	2	58.75	F18:7518	7	892	904
1	1	P01024|CO3_HUMAN	K.AGDFLEANYMNLQR.S	Y	63.3	1640.76	1	821.389	2	53.12	F17:7935	8	1172	1185
1	1	P01024|CO3_HUMAN	R.KVLLDGVQNPRAEDLVGK.S	Y	63.08	1950.09	-1.1	976.051	2	38.71	F16:5667	9	305	322
1	1	P01024|CO3_HUMAN	K.DFDFVPPVVR.W	Y	62.69	1189.61	-0.8	595.813	2	58.17	F16:9332	4	1245	1254
1	1	P01024|CO3_HUMAN	K.VYAYYNLEESC(+105.06)TR.F	Y	62.42	1714.77	-0.7	858.39	2	39.15	F17:5584	5	1479	1491	S-pyridylethylation
1	1	P01024|CO3_HUMAN	R.TVM(+15.99)VNIENPEGIPVK.Q	Y	61.3	1654.86	-1	828.436	2	47.97	F16:7470	2	162	176	Oxidation (M)
1	1	P01024|CO3_HUMAN	R.LKHLIVTPSGC(+105.06)GEQNMIGMTPTVIAVHYLDETEQWEK.F	Y	59.23	4272.11	-0.1	1069.03	4	62.99	F17:9501	4	1000	1036	S-pyridylethylation
1	1	P01024|CO3_HUMAN	K.SGQSEDRQPVPGQQM(+15.99)TLKIEGDHGAR.V	Y	59.14	2836.35	-0.9	946.457	3	33.12	F16:4549	4	567	592	Oxidation (M)
1	1	P01024|CO3_HUMAN	R.YYTYLIMNK.G	Y	59.01	1207.59	0.6	604.805	2	47.23	F16:7326	2	489	497
1	1	P01024|CO3_HUMAN	R.YISKYELDK.A	Y	58.46	1157.6	-0.5	579.805	2	27.36	F17:3446	6	1428	1436
1	1	P01024|CO3_HUMAN	R.ILLQGTPVAQMTEDAVDAERLK.H	Y	57.5	2397.26	-0.1	800.093	3	61.8	F17:9320	21	980	1001
1	1	P01024|CO3_HUMAN	K.SGQSEDRQPVPGQQM(+15.99)TLK.I	Y	57.41	2000.96	0.2	1001.49	2	29.08	F16:3760	6	567	584	Oxidation (M)
1	1	P01024|CO3_HUMAN	K.DTWVEHWPEEDEC(+105.06)QDEENQK.Q	Y	56.96	2650.06	-0.5	884.359	3	41.6	F17:6022	2	1625	1644	S-pyridylethylation
1	1	P01024|CO3_HUMAN	R.ILLQGTPVAQM(+15.99)TEDAVDAERLK.H	Y	56.79	2413.25	-0.4	805.424	3	60.42	F18:7736	5	980	1001	Oxidation (M)
1	1	P01024|CO3_HUMAN	K.SDDKVTLEERLDKAC(+105.06)EPGVDYVYKTR.L	Y	56.39	3133.54	-1	784.391	4	42.32	F18:5270	3	1523	1548	S-pyridylethylation
1	1	P01024|CO3_HUMAN	R.VPVA(+156.12)VQGEDTVQSLTQGDGVAK.L	Y	56.18	2353.24	-5.9	785.415	3	44.15	F16:6739	2	387	408	SL-HNE (A)
1	1	P01024|CO3_HUMAN	K.AKDQLTC(+105.06)NKFDLK.V	Y	55.94	1627.84	-0.7	814.926	2	28.76	F17:3694	9	1352	1364	S-pyridylethylation
1	1	P01024|CO3_HUMAN	K.KGYTQQLAFR.Q	Y	55.28	1210.65	-4	606.328	2	32.48	F17:4378	6	1051	1060
1	1	P01024|CO3_HUMAN	R.IHWESASLLR.S	Y	54.9	1210.65	0.5	606.331	2	43.86	F16:6684	5	1311	1320
1	1	P01024|CO3_HUMAN	R.TLDPERLGR.E	Y	54.4	1055.57	-0.5	528.793	2	28.89	F19:2847	12	946	954
1	1	P01024|CO3_HUMAN	K.YFKPGMPFDLM(+15.99)VFVTNPDGSPAYRVPVAVQGEDTVQSLTQGDGVAK.L	Y	54.4	4943.41	2.8	1236.86	4	67.69	F16:10875	5	363	408	Oxidation (M)
1	1	P01024|CO3_HUMAN	R.YYTYLIM(+15.99)NK.G	Y	54.14	1223.59	1	612.803	2	47.64	F17:7040	3	489	497	Oxidation (M)
1	1	P01024|CO3_HUMAN	K.QKPDGVFQEDAPVIHQEMIGGLR.N	Y	54.1	2563.29	-1.6	855.434	3	48.94	F16:7660	4	1112	1134
1	1	P01024|CO3_HUMAN	K.SDDKVTLEER.L	Y	53.86	1190.58	-0.1	596.296	2	20.03	F18:1879	18	1523	1532
1	1	P01024|CO3_HUMAN	R.TVMVNIENPEGIPVKQDSLSSQNQLGVLPLSWDIPELVNMGQWK.I	Y	53.65	4902.49	1.7	1226.63	4	78.63	F16:12443	4	162	205
1	1	P01024|CO3_HUMAN	R.FYHPEKEDGKLNK.L	Y	53.64	1603.8	-0.3	802.907	2	19.85	F17:2150	5	1492	1504
1	1	P01024|CO3_HUMAN	K.RMDKVGKYPK.E	Y	53.63	1220.67	0.4	611.342	2	9.22	F18:837	25	679	688
1	1	P01024|CO3_HUMAN	R.QPSSAFAAFVKR.A	Y	53.44	1307.7	-0.6	654.856	2	42.15	F17:6121	7	1061	1072
1	1	P01024|CO3_HUMAN	K.LMNIFLK.D	Y	52.89	877.51	0.2	439.762	2	53.19	F18:6771	8	790	796
1	1	P01024|CO3_HUMAN	R.EVVADSVWVDVKDSC(+105.06)VGSLVVK.S	Y	52.82	2437.26	-0.5	813.426	3	88.23	F19:9250	62	545	566	S-pyridylethylation
1	1	P01024|CO3_HUMAN	K.VTIKPAPETEK.R	Y	51.73	1211.68	-1.4	606.845	2	19.63	F17:2110	8	1365	1375
1	1	P01024|CO3_HUMAN	K.DKNRWEDPGKQLYNVEATSYALLALLQLKDFDFVPPVVR.W	Y	51.49	4547.39	-2.2	1137.85	4	84.97	F16:13242	4	1216	1254
1	1	P01024|CO3_HUMAN	R.SVQLTEKR.M	Y	51.39	959.54	-1.6	480.776	2	9.41	F19:800	15	672	679
1	1	P01024|CO3_HUMAN	K.YFKPGMPFDLMVFVTNPDGSPAYRVPVAVQGEDTVQSLTQGDGVAK.L	Y	51.28	4927.42	-0.3	1232.86	4	73.09	F19:7993	12	363	408
1	1	P01024|CO3_HUMAN	K.KHYLMWGLSSDFWGEKPNLSYIIGK.D	Y	50.75	2968.49	-0.1	743.131	4	65.84	F17:9928	2	1600	1624
1	1	P01024|CO3_HUMAN	R.ASHLGLAR.S	Y	50.56	823.466	1.3	275.496	3	17.95	F19:1486	10	741	748
1	1	P01024|CO3_HUMAN	R.CAEENC(+105.06)FIQK.S	Y	50.56	1288.56	-0.7	645.286	2	28.75	F17:3692	6	1513	1522	S-pyridylethylation
1	1	P01024|CO3_HUMAN	K.TPKYFKPGMPFDLMVFVTNPDGSPAYRVPVAVQGEDTVQSLTQGDGVAK.L	Y	49.86	5253.62	-0.4	1314.41	4	69.34	F16:11126	2	360	408
1	1	P01024|CO3_HUMAN	K.KGYTQQLAFRQPSSAFAAFVK.R	Y	49.72	2344.23	1.2	782.419	3	51.4	F16:8116	4	1051	1071
1	1	P01024|CO3_HUMAN	R.LESEETM(+15.99)VLEAHDAQGDVPVTVTVHDFPGK.K	Y	48.93	3265.54	0.2	817.394	4	52.66	F17:7866	2	36	65	Oxidation (M)
1	1	P01024|CO3_HUMAN	K.VVPEGIR.M	Y	48.89	768.449	-0.4	385.232	2	23.71	F18:2419	2	931	937
1	1	P01024|CO3_HUMAN	K.FYYIYNEK.G	Y	48.81	1138.53	-0.2	570.274	2	41.38	F16:6198	2	242	249
1	1	P01024|CO3_HUMAN	R.LDKAC(+105.06)EPGVDYVYKTR.L	Y	48.64	1960.97	1.6	654.665	3	30.8	F17:4076	2	1533	1548	S-pyridylethylation
1	1	P01024|CO3_HUMAN	K.YFKPGMPFDLM(+15.99)VFVTNPDGSPAYR.V	Y	48.63	2764.3	2.2	922.444	3	65.97	F16:10598	3	363	386	Oxidation (M)
1	1	P01024|CO3_HUMAN	K.QLYNVEATSYALLALLQLKDFDFVPPVVR.W	Y	48.52	3321.8	1.7	1108.28	3	89.29	F16:13771	5	1226	1254
1	1	P01024|CO3_HUMAN	K.EYVLPSFEVIVEPTEK.F	Y	48.31	1877.97	-0.1	939.99	2	62.97	F16:10138	3	226	241
1	1	P01024|CO3_HUMAN	R.EALKLEEK.K	Y	47.79	958.533	-1	480.274	2	21.41	F18:2067	12	1592	1599
1	1	P01024|CO3_HUMAN	K.YFKPGM(+15.99)PFDLMVFVTNPDGSPAYRVPVAVQGEDTVQSLTQGDGVAK.L	Y	47.53	4943.41	-2	1236.86	4	70.16	F17:10545	7	363	408	Oxidation (M)
1	1	P01024|CO3_HUMAN	K.QC(+105.06)QDLGAFTESM(+15.99)VVFGC(+105.06)PN	Y	47.49	2270.98	-0.1	758	3	58.41	F20:4937	9	1645	1663	S-pyridylethylation; Oxidation (M)
1	1	P01024|CO3_HUMAN	K.NRWEDPGKQLYNVEATSYALLALLQLKDFDFVPPVVR.W	Y	46.82	4304.26	4.2	1077.08	4	86.63	F17:12585	3	1218	1254
1	1	P01024|CO3_HUMAN	K.DQLTC(+105.06)NKFDLK.V	Y	46.71	1428.71	0.2	715.361	2	33.02	F17:4481	5	1354	1364	S-pyridylethylation
1	1	P01024|CO3_HUMAN	R.M(+15.99)DKVGKYPK.E	Y	46.43	1080.56	0.4	541.289	2	9.33	F19:787	1	680	688	Oxidation (M)
1	1	P01024|CO3_HUMAN	K.HLIVTPSGC(+105.06)GEQNMIGM(+15.99)TPTVIAVHYLDETEQWEK.F	Y	46.18	4046.92	0.7	1012.74	4	65.08	F17:9819	6	1002	1036	S-pyridylethylation; Oxidation (M)
1	1	P01024|CO3_HUMAN	K.QKPDGVFQEDAPVIHQEM(+15.99)IGGLR.N	Y	45.9	2579.28	0.5	860.768	3	49.37	F17:7340	3	1112	1134	Oxidation (M)
1	1	P01024|CO3_HUMAN	K.IEGDHGAR.V	Y	45.77	853.404	-0.6	427.709	2	5.24	F16:434	2	585	592
1	1	P01024|CO3_HUMAN	R.SEETKENEGFTVTAEGKGQGTLSVVTMYHAK.A	Y	45.7	3327.59	-1.2	832.904	4	111.02	F17:15032	5	1321	1351
1	1	P01024|CO3_HUMAN	R.C(+105.06)AEENC(+105.06)FIQK.S	Y	45.3	1393.62	-0.4	697.815	2	23.28	F17:2740	13	1513	1522	S-pyridylethylation
1	1	P01024|CO3_HUMAN	K.NTM(+15.99)ILEIC(+105.06)TR.Y	Y	45.27	1313.65	0.6	657.831	2	44.46	F17:6531	1	1382	1391	Oxidation (M); S-pyridylethylation
1	1	P01024|CO3_HUMAN	K.IWDVVEK.A	Y	44.42	887.475	0.1	444.745	2	38.78	F16:5682	2	616	622
1	1	P01024|CO3_HUMAN	R.TVMVNIENPEGIPVKQDSLSSQNQLGVLPLSWDIPELVNM(+15.99)GQWK.I	Y	44.13	4918.49	-0.2	1230.63	4	75.38	F16:12004	2	162	205	Oxidation (M)
1	1	P01024|CO3_HUMAN	R.TFISPIK.C	Y	43.54	804.475	0	403.245	2	37.79	F17:5341	8	1583	1589
1	1	P01024|CO3_HUMAN	K.NTMILEIC(+105.06)TR.Y	Y	42.84	1297.65	-0.2	649.833	2	45.11	F17:6639	1	1382	1391	S-pyridylethylation
1	1	P01024|CO3_HUMAN	R.QPSSAFAAFVK.R	Y	42.66	1151.6	-1	576.805	2	48.36	F17:7170	9	1061	1071
1	1	P01024|CO3_HUMAN	K.VGKYPKELR.K	Y	42.46	1088.63	0.2	545.324	2	18.69	F19:1568	8	683	691
1	1	P01024|CO3_HUMAN	K.IWDVVEKADIGC(+105.06)TPGSGKDYAGVFSDAGLTFTSSSGQQTAQR.A	Y	42.34	4454.11	0.5	1114.54	4	98.13	F16:14790	25	616	657	S-pyridylethylation
1	1	P01024|CO3_HUMAN	K.DIC(+105.06)EEQVNSLPGSITK.A	Y	42.15	1836.89	-0.5	613.305	3	39.95	F16:5913	2	1156	1171	S-pyridylethylation
1	1	P01024|CO3_HUMAN	K.IRYYTYLIMNK.G	Y	41.77	1476.78	-0.1	493.267	3	47.36	F16:7352	2	487	497
1	1	P01024|CO3_HUMAN	K.GYTQQLAFR.Q	Y	41.74	1082.55	-1.2	542.282	2	38.11	F17:5404	3	1052	1060
1	1	P01024|CO3_HUMAN	R.ISLPESLKR.I	Y	41.73	1041.62	-0.6	521.816	2	35.79	F16:5082	7	282	290
1	1	P01024|CO3_HUMAN	K.HLIVTPSGC(+105.06)GEQNMIGMTPTVIAVHYLDETEQWEKFGLEK.R	Y	39.96	4605.24	-0.6	1152.32	4	68.04	F16:10932	4	1002	1041	S-pyridylethylation
1	1	P01024|CO3_HUMAN	R.AEDLVGK.S	Y	39.82	730.386	-0.6	366.2	2	9.64	F16:1006	2	316	322
1	1	P01024|CO3_HUMAN	R.AVLYNYR.Q	Y	39.55	897.471	-0.1	449.743	2	31.21	F18:3581	6	849	855
1	1	P01024|CO3_HUMAN	R.NNNEKDM(+15.99)ALTAFVLISLQEAKDIC(+105.06)EEQVNSLPGSITK.A	Y	39.14	4183.08	1.1	1046.78	4	77.51	F16:12293	6	1135	1171	Oxidation (M); S-pyridylethylation
1	1	P01024|CO3_HUMAN	K.RQGALELIKK.G	Y	39.11	1154.71	-0.6	385.912	3	25.76	F16:3091	10	1042	1051
1	1	P01024|CO3_HUMAN	K.NKLTQSK.I	N	38.81	817.466	0.7	409.74	2	4.08	F16:324	14	609	615
1	1	P01024|CO3_HUMAN	K.FGLEKR.Q	Y	38.71	748.423	0	375.219	2	20.76	F17:2302	8	1037	1042
1	1	P01024|CO3_HUMAN	K.LVLSSEK.T	Y	38.41	774.449	0.4	388.232	2	21.83	F16:2382	4	67	73
1	1	P01024|CO3_HUMAN	K.RM(+15.99)DKVGKYPK.E	Y	38.4	1236.66	-1	619.339	2	8.53	F19:694	15	679	688	Oxidation (M)
1	1	P01024|CO3_HUMAN	K.RQGALELIK.K	Y	38.23	1026.62	1.7	343.214	3	32.82	F16:4491	4	1042	1050
1	1	P01024|CO3_HUMAN	R.ISLPESLK.R	Y	38.12	885.517	0	443.766	2	40.95	F16:6108	4	282	289
1	1	P01024|CO3_HUMAN	K.GVFVLNKK.N	Y	37.7	903.554	-0.2	452.784	2	28.52	F16:3643	2	601	608
1	1	P01024|CO3_HUMAN	R.WLNEQR.Y	Y	37.51	844.419	0.2	423.217	2	25.29	F17:3097	4	1255	1260
1	1	P01024|CO3_HUMAN	R.SNLDEDIIAEENIVSRSEFPESWLWNVEDLKEPPKNGISTK.L	Y	37.27	4727.32	0.6	1182.84	4	70.05	F18:8857	4	749	789
1	1	P01024|CO3_HUMAN	K.YFKPGM(+15.99)PFDLM(+15.99)VFVTNPDGSPAYRVPVAVQGEDTVQSLTQGDGVAK.L	Y	37.13	4959.41	1.2	1240.86	4	72.96	F17:10916	1	363	408	Oxidation (M)
1	1	P01024|CO3_HUMAN	R.EALKLEEKK.H	Y	36.73	1086.63	0.4	544.322	2	16.54	F17:1647	2	1592	1600
1	1	P01024|CO3_HUMAN	R.TLDPERLGREGVQKEDIPPADLSDQVPDTESETR.I	Y	35.92	3791.84	-3.2	948.966	4	42.98	F16:6513	1	946	979
1	1	P01024|CO3_HUMAN	R.TLDPERLGREGVQK.E	Y	35.38	1596.86	-0.1	799.436	2	28.98	F18:3223	2	946	959
1	1	P01024|CO3_HUMAN	K.LM(+15.99)NIFLK.D	Y	35.37	893.505	-1.2	447.759	2	53.23	F18:6777	2	790	796	Oxidation (M)
1	1	P01024|CO3_HUMAN	K.DTWVEHWPEEDEC(+105.06)QDEENQKQC(+105.06)QDLGAFTESMVVFGC(+105.06)PN	Y	35.01	4887.03	-1.5	1222.76	4	59.78	F16:9609	4	1625	1663	S-pyridylethylation
1	1	P01024|CO3_HUMAN	R.QGALELIK.K	Y	34.67	870.518	-0.1	436.266	2	40.02	F16:5928	3	1043	1050
1	1	P01024|CO3_HUMAN	R.LPYSVVR.N	Y	34.47	832.481	2	417.248	2	33.53	F16:4626	6	835	841
1	1	P01024|CO3_HUMAN	R.MDKVGKYPKELR.K	Y	34.04	1462.8	1.7	488.607	3	23.21	F19:2107	4	680	691
1	1	P01024|CO3_HUMAN	R.LVKVQLSNDFDEYIM(+15.99)AIEQTIKSGSDEVQVGQQR.T	Y	33.97	3882.93	-2.1	971.738	4	76.11	F18:9460	2	1549	1582	Oxidation (M)
1	1	P01024|CO3_HUMAN	R.FISLGEAC(+105.06)K.K	Y	33.92	1071.54	-0.5	536.778	2	34.8	F16:4874	3	713	721	S-pyridylethylation
1	1	P01024|CO3_HUMAN	R.TLDPER.L	Y	33.76	729.366	1.2	365.691	2	13.56	F17:1315	6	946	951
1	1	P01024|CO3_HUMAN	K.VGKYPK.E	Y	33.54	690.406	0.1	346.211	2	8.35	F18:719	10	683	688
1	1	P01024|CO3_HUMAN	R.LKGPLLNK.F	Y	32.66	881.57	-0.2	441.792	2	24.69	F16:2892	4	1202	1209
1	1	P01024|CO3_HUMAN	K.VTLEERLDK.A	Y	32.17	1101.6	-1.6	551.808	2	29.47	F17:3824	1	1527	1535
1	1	P01024|CO3_HUMAN	R.QPVPGQQM(+15.99)TLK.I	Y	32.17	1241.64	-0.3	621.829	2	31.56	F16:4232	2	574	584	Oxidation (M)
1	1	P01024|CO3_HUMAN	K.GIC(+105.06)VADPFEVTVMQDFFIDLR.L	Y	32.11	2519.22	-1.9	840.747	3	98.62	F18:11393	5	814	834	S-pyridylethylation
1	1	P01024|CO3_HUMAN	K.DSC(+105.06)VGSLVVK.S	Y	32.1	1110.57	-4	556.292	2	31.94	F16:4314	5	557	566	S-pyridylethylation
1	1	P01024|CO3_HUMAN	K.KLVLSSEK.T	Y	31.47	902.544	0	452.279	2	18.82	F17:1985	3	66	73
1	1	P01024|CO3_HUMAN	R.QPVPGQQMTLK.I	Y	31.01	1225.65	0.2	613.832	2	31.68	F16:4257	2	574	584
1	1	P01024|CO3_HUMAN	R.ISLPESLKRIPIEDGSGEVVLSR.K	Y	30.45	2493.38	1.4	832.135	3	53.4	F16:8479	1	282	304
1	1	P01024|CO3_HUMAN	R.IFTVNHK.L	Y	30.42	857.476	0.3	429.745	2	18.57	F16:1894	6	149	155
1	1	P01024|CO3_HUMAN	K.HLIVTPSGC(+105.06)GEQNMIGMTPTVIAVHYLDETEQWEKFGLEKR.Q	Y	30.17	4761.34	1.4	1191.34	4	67	F17:10105	3	1002	1042	S-pyridylethylation
1	1	P01024|CO3_HUMAN	R.QGALELIKK.G	Y	29.77	998.612	0.2	333.878	3	31.74	F16:4270	8	1043	1051
1	1	P01024|CO3_HUMAN	R.WEDPGKQLYNVEATSYALLALLQLK.D	Y	29.55	2862.52	0.1	955.18	3	87.9	F17:12734	2	1220	1244
1	1	P01024|CO3_HUMAN	R.KC(+105.06)C(+105.06)EDGM(+15.99)RENPMR.F	Y	29	1793.75	1.1	897.882	2	8.65	F16:821	3	692	704	S-pyridylethylation; Oxidation (M)
1	1	P01024|CO3_HUMAN	R.QNQELK.V	Y	28.69	758.392	2.2	380.204	2	8.62	F18:747	1	856	861
1	1	P01024|CO3_HUMAN	R.VELLHNPAFC(+105.06)SLATTKR.R	Y	28.46	2004.06	-0.8	502.022	4	40.95	F18:5072	1	864	880	S-pyridylethylation
1	1	P01024|CO3_HUMAN	K.TVAVR.T	Y	28.24	544.333	1.1	273.174	2	7.68	F19:627	7	941	945
1	1	P01024|CO3_HUMAN	R.FLYGK.K	N	28.1	626.343	0.9	314.179	2	27.56	F16:3452	2	259	263
1	1	P01024|CO3_HUMAN	K.C(+105.06)C(+105.06)EDGMRENPMR.F	Y	28.02	1649.66	-2.1	825.834	2	21.97	F19:1960	5	693	704	S-pyridylethylation
1	1	P01024|CO3_HUMAN	K.TPKYFKPGMPFDLMVFVTNPDGSPAYR.V	Y	26.32	3074.5	0.4	769.633	4	67.35	F16:10819	1	360	386
1	1	P01024|CO3_HUMAN	R.ENPMR.F	Y	25.62	645.29	1.3	323.653	2	7.96	F17:752	6	700	704
1	1	P01024|CO3_HUMAN	K.KHYLM(+15.99)WGLSSDFWGEKPNLSYIIGK.D	Y	25.57	2984.49	1.9	747.131	4	63.18	F17:9531	1	1600	1624	Oxidation (M)
1	1	P01024|CO3_HUMAN	K.FGLEK.R	N	25.01	592.322	0.8	297.168	2	26.01	F16:3139	2	1037	1041
1	1	P01024|CO3_HUMAN	R.KC(+105.06)C(+105.06)EDGMRENPMR.F	Y	24.77	1777.75	0.2	889.884	2	18.35	F16:1863	3	692	704	S-pyridylethylation
1	1	P01024|CO3_HUMAN	R.SNLDEDIIAEENIVSRSEFPESWLWNVEDLKEPPK.N	Y	23.53	4127	0.3	1032.76	4	73.08	F18:9172	2	749	783
1	1	P01024|CO3_HUMAN	K.FLTTAK.D	Y	23.41	679.39	0.6	340.703	2	19.81	F16:2067	3	1210	1215
1	1	P01024|CO3_HUMAN	K.WLILEK.Q	Y	23.2	800.48	-1.1	401.247	2	48.99	F16:7668	3	1106	1111
1	1	P01024|CO3_HUMAN	R.LLKAGR.Q	Y	22.62	656.433	0.6	329.224	2	8.32	F16:775	1	500	505
1	1	P01024|CO3_HUMAN	R.YRGDQDATMSILDISMMTGFAPDTDDLK.Q	Y	21.63	3106.39	1.5	1036.47	3	71.06	F16:11387	3	1392	1419
1	1	P01024|CO3_HUMAN	R.TFISPIKC(+105.06)R.E	Y	21.51	1168.64	-1.3	585.328	2	30.29	F18:3444	1	1583	1591	S-pyridylethylation
1	1	P01024|CO3_HUMAN	K.RRHQQTVTIPPK.S	Y	21.38	1459.84	-0.6	365.966	4	9.32	F18:857	5	880	891
1	1	P01024|CO3_HUMAN	R.MDKVGKYPK.E	Y	21.07	1064.57	-1.6	355.863	3	9.4	F17:937	2	680	688
1	1	P01024|CO3_HUMAN	K.GLEVTITAR.F	Y	20.94	958.545	-1.9	480.279	2	88.9	F16:13721	3	250	258
1	1	P01024|CO3_HUMAN	R.TRFISLGEAC(+105.06)KK.V	Y	20.17	1456.79	-1.2	486.602	3	27.7	F16:3478	2	711	722	S-pyridylethylation
2	2	P01023|A2MG_HUMAN	K.LHTEAQIQEEGTVVELTGR.Q	Y	140.33	2109.07	-3	1055.54	2	43.58	F19:4659	94	320	338
2	2	P01023|A2MG_HUMAN	K.AGAFC(+105.06)LSEDAGLGISSTASLR.A	N	126.55	2130.04	-0.8	1066.03	2	98.26	F19:10120	171	767	787	S-pyridylethylation
2	2	P01023|A2MG_HUMAN	K.VYDYYETDEFAIAEYNAPC(+105.06)SK.D	Y	120.01	2595.11	-3.1	1298.56	2	51.32	F19:5551	167	1449	1469	S-pyridylethylation
2	2	P01023|A2MG_HUMAN	R.LVHVEEPHTETVR.K	Y	119.21	1544.79	0.9	773.405	2	25.65	F19:2418	18	720	732
2	2	P01023|A2MG_HUMAN	K.AAQVTIQSSGTFSSK.F	Y	107.2	1510.76	-0.7	756.388	2	36.24	F20:2987	12	1275	1289
2	2	P01023|A2MG_HUMAN	K.MVSGFIPLKPTVK.M	N	105.04	1415.82	0.7	708.918	2	45.3	F18:5694	12	1385	1397
2	2	P01023|A2MG_HUMAN	K.GGVEDEVTLSAYITIALLEIPLTVTHPVVR.N	Y	100.51	3204.76	5.9	1069.27	3	99.01	F19:10206	8	1093	1122
2	2	P01023|A2MG_HUMAN	R.IAQWQSFQLEGGLK.Q	Y	100.34	1603.84	1.6	802.927	2	54.17	F19:5891	60	175	188
2	2	P01023|A2MG_HUMAN	K.SSSNEEVM(+15.99)FLTVQVK.G	Y	97.6	1712.83	0.6	857.422	2	56.16	F19:6138	9	94	108	Oxidation (M)
2	2	P01023|A2MG_HUMAN	K.SSSNEEVMFLTVQVK.G	Y	96.22	1696.83	0.8	849.425	2	58.56	F19:6427	100	94	108
2	2	P01023|A2MG_HUMAN	R.SLFTDLEAENDVLHC(+105.06)VAFAVPK.S	Y	89.82	2522.25	-2.2	1262.13	2	69.43	F18:8784	22	72	93	S-pyridylethylation
2	2	P01023|A2MG_HUMAN	K.ALLAYAFALAGNQDK.R	Y	89.64	1564.82	-0.1	783.42	2	63.82	F19:7025	12	1148	1162
2	2	P01023|A2MG_HUMAN	R.VGFYESDVM(+15.99)GR.G	Y	89.51	1274.56	-0.7	638.287	2	42.7	F19:4559	10	705	715	Oxidation (M)
2	2	P01023|A2MG_HUMAN	K.VDLSFSPSQSLPASHAHLR.V	Y	89.49	2048.04	0.2	1025.03	2	42.54	F16:6423	6	568	586
2	2	P01023|A2MG_HUMAN	R.KYFPETWIWDLVVVNSAGVAEVGVTVPDTITEWK.A	Y	88.28	3847.97	-1.1	1283.66	3	94.98	F18:11041	50	733	766
2	2	P01023|A2MG_HUMAN	R.VGFYESDVMGR.G	Y	86.58	1258.57	0	630.29	2	42.77	F19:4567	23	705	715
2	2	P01023|A2MG_HUMAN	K.QQNAQGGFSSTQDTVVALHALSK.Y	Y	84.72	2386.19	-0.5	796.403	3	47.79	F19:5138	111	1241	1263
2	2	P01023|A2MG_HUMAN	R.TEVSSNHVLIYLDK.V	Y	83.62	1616.84	1	809.429	2	44.14	F17:6479	8	1408	1421
2	2	P01023|A2MG_HUMAN	R.LLLQQVSLPELPGEYSMK.V	Y	83.3	2044.09	3	1023.06	2	64.67	F18:8257	8	1298	1315
2	2	P01023|A2MG_HUMAN	R.TTVMVKNEDSLVFVQTDKSIYKPGQTVK.F	Y	83.3	3154.66	-1.2	789.671	4	111.1	F20:9342	44	118	145
2	2	P01023|A2MG_HUMAN	K.ALLAYAFALAGNQDKR.K	Y	82.68	1720.93	-0.6	861.47	2	59.71	F17:9001	6	1148	1163
2	2	P01023|A2MG_HUMAN	K.M(+15.99)VSGFIPLKPTVK.M	N	80.93	1431.82	-0.2	716.915	2	45.2	F18:5679	17	1385	1397	Oxidation (M)
2	2	P01023|A2MG_HUMAN	R.VSVQLEASPAFLAVPVEK.E	Y	80.36	1883.04	0.2	942.528	2	58.68	F16:9421	6	824	841
2	2	P01023|A2MG_HUMAN	K.HYDGSYSTFGER.Y	Y	79.69	1417.59	-0.5	709.802	2	28.93	F19:2854	12	1020	1031
2	2	P01023|A2MG_HUMAN	K.QFSFPLSSEPFQGSYK.V	Y	79.35	1847.87	0.3	924.944	2	58.3	F17:8785	10	189	204
2	2	P01023|A2MG_HUMAN	R.IAQWQSFQLEGGLKQFSFPLSSEPFQGSYK.V	Y	78.72	3433.7	2.5	1145.58	3	68	F16:10924	5	175	204
2	2	P01023|A2MG_HUMAN	K.NEDSLVFVQTDK.S	Y	78.6	1393.67	0.9	697.844	2	42.44	F17:6170	5	124	135
2	2	P01023|A2MG_HUMAN	K.MC(+105.06)PQLQQYEMHGPEGLR.V	Y	77.9	2120.96	-0.1	1061.49	2	39.81	F16:5887	8	688	704	S-pyridylethylation
2	2	P01023|A2MG_HUMAN	K.GHFSISIPVKSDIAPVAR.L	Y	77.85	1893.05	0.8	947.532	2	46.74	F17:6897	13	522	539
2	2	P01023|A2MG_HUMAN	R.SSGSLLNNAIKGGVEDEVTLSAYITIALLEIPLTVTHPVVR.N	Y	76.94	4289.35	0.6	1430.79	3	98.99	F19:10204	11	1082	1122
2	2	P01023|A2MG_HUMAN	R.LLIYAVLPTGDVIGDSAK.Y	Y	76.68	1844.03	0.6	923.023	2	64.76	F17:9770	12	540	557
2	2	P01023|A2MG_HUMAN	R.LVHVEEPHTETVRK.Y	Y	76.64	1672.89	-1	837.451	2	21.69	F16:2360	11	720	733
2	2	P01023|A2MG_HUMAN	R.TEHPFTVEEFVLPK.F	Y	76.53	1671.85	0.4	836.933	2	54.52	F16:8678	9	215	228
2	2	P01023|A2MG_HUMAN	K.SKAIGYLNTGYQR.Q	Y	76.12	1469.76	-2.2	735.887	2	32.39	F17:4359	12	1002	1014
2	2	P01023|A2MG_HUMAN	R.NQGNTWLTAFVLK.T	N	75.26	1490.79	0.9	746.402	2	66.52	F17:10034	4	1035	1047
2	2	P01023|A2MG_HUMAN	K.DTVIKPLLVEPEGLEK.E	Y	73.42	1779	1.8	890.51	2	50.86	F16:8013	6	897	912
2	2	P01023|A2MG_HUMAN	R.SSGSLLNNAIK.G	N	72.9	1102.6	-1.8	552.305	2	36.9	F17:5168	5	1082	1092
2	2	P01023|A2MG_HUMAN	K.FRVVSMDENFHPLNELIPLVYIQDPK.G	Y	71.97	3112.61	0.4	1038.54	3	68.95	F16:11070	7	146	171
2	2	P01023|A2MG_HUMAN	R.VVSMDENFHPLNELIPLVYIQDPK.G	Y	71.1	2809.44	-0.2	1405.72	2	71.22	F17:10691	14	148	171
2	2	P01023|A2MG_HUMAN	K.YFPETWIWDLVVVNSAGVAEVGVTVPDTITEWK.A	Y	70.82	3719.88	-1.9	1240.96	3	98.88	F18:11420	14	734	766
2	2	P01023|A2MG_HUMAN	K.YDVENC(+105.06)LANKVDLSFSPSQSLPASHAHLR.V	Y	70.53	3302.61	0.9	826.662	4	111.1	F19:11319	34	558	586	S-pyridylethylation
2	2	P01023|A2MG_HUMAN	R.HNVYINGITYTPVSSTNEKDMYSFLEDMGLK.A	Y	70.52	3565.67	0.2	1189.57	3	67.06	F16:10772	4	646	676
2	2	P01023|A2MG_HUMAN	R.TGTHGLLVKQEDMK.G	Y	68.53	1555.8	0.7	778.909	2	24.24	F16:2804	6	508	521
2	2	P01023|A2MG_HUMAN	K.SGGRTEHPFTVEEFVLPK.F	Y	68.04	2029.03	-0.7	1015.52	2	49.72	F16:7802	9	211	228
2	2	P01023|A2MG_HUMAN	K.MC(+105.06)PQLQQYEM(+15.99)HGPEGLR.V	Y	65.8	2136.95	-0.4	1069.48	2	39.75	F16:5874	11	688	704	S-pyridylethylation; Oxidation (M)
2	2	P01023|A2MG_HUMAN	K.LPPNVVEESAR.A	Y	65.53	1209.64	-1.2	605.824	2	31.59	F16:4237	6	935	945
2	2	P01023|A2MG_HUMAN	R.QLNYKHYDGSYSTFGER.Y	Y	65.12	2063.93	-0.1	1032.97	2	34.63	F17:4769	8	1015	1031
2	2	P01023|A2MG_HUMAN	K.DMYSFLEDMGLK.A	Y	64.95	1447.64	2.2	724.827	2	75.06	F16:11957	2	665	676
2	2	P01023|A2MG_HUMAN	K.AIGYLNTGYQR.Q	Y	64.67	1254.64	-0.4	628.325	2	37.94	F17:5369	10	1004	1014
2	2	P01023|A2MG_HUMAN	K.DTVIKPLLVEPEGLEKETTFNSLLC(+105.06)PSGGEVSEELSLK.L	Y	64.26	4205.17	1	1052.3	4	63.24	F17:9541	20	897	934	S-pyridylethylation
2	2	P01023|A2MG_HUMAN	K.NEDSLVFVQTDKSIYKPGQTVK.F	Y	63.89	2495.29	-0.1	832.771	3	42.7	F16:6458	2	124	145
2	2	P01023|A2MG_HUMAN	K.ETTFNSLLC(+105.06)PSGGEVSEELSLK.L	Y	63.76	2444.18	1.1	815.734	3	55.75	F16:8898	4	913	934	S-pyridylethylation
2	2	P01023|A2MG_HUMAN	K.M(+15.99)C(+105.06)PQLQQYEM(+15.99)HGPEGLR.V	Y	63.58	2152.95	0	1077.48	2	39.78	F16:5880	12	688	704	Oxidation (M); S-pyridylethylation
2	2	P01023|A2MG_HUMAN	R.AYIFIDEAHITQALIWLSQR.Q	Y	63.19	2387.26	0.7	796.762	3	81.74	F19:8720	10	1054	1073
2	2	P01023|A2MG_HUMAN	K.SLNEEAVKKDNSVHWERPQKPK.A	Y	63.08	2618.36	0.6	873.793	3	26.68	F17:3329	7	1169	1190
2	2	P01023|A2MG_HUMAN	R.LVDGKGVPIPNKVIFIR.G	Y	62.85	1864.13	-0.4	933.072	2	47.68	F16:7413	7	371	387
2	2	P01023|A2MG_HUMAN	K.YNILPEKEEFPFALGVQTLPQTC(+105.06)DEPK.A	Y	62.75	3210.59	0.5	1071.21	3	59.47	F16:9554	6	1330	1356	S-pyridylethylation
2	2	P01023|A2MG_HUMAN	R.KDTVIKPLLVEPEGLEK.E	Y	61.53	1907.1	-0.2	954.556	2	44	F16:6712	6	896	912
2	2	P01023|A2MG_HUMAN	K.EVLKSLNEEAVK.K	Y	61.37	1357.75	-0.6	679.88	2	30.98	F16:4116	3	1165	1176
2	2	P01023|A2MG_HUMAN	R.LLLQQVSLPELPGEYSM(+15.99)K.V	Y	60.95	2060.09	0.9	1031.05	2	62.04	F16:9984	4	1298	1315	Oxidation (M)
2	2	P01023|A2MG_HUMAN	R.AFQPFFVELTMPYSVIR.G	N	60.44	2044.05	1.8	1023.03	2	77.36	F16:12273	4	788	804
2	2	P01023|A2MG_HUMAN	K.YGAATFTR.T	N	59.95	885.434	0	443.724	2	27.81	F17:3524	4	1264	1271
2	2	P01023|A2MG_HUMAN	K.APVGHFYEPQAPSAEVEMTSYVLLAYLTAQPAPTSEDLTSATNIVK.W	Y	59.67	4906.43	-3	1227.61	4	82.42	F20:6914	11	1191	1236
2	2	P01023|A2MG_HUMAN	R.LVDGKGVPIPNK.V	Y	58.74	1235.72	0.7	618.87	2	28.89	F16:3722	4	371	382
2	2	P01023|A2MG_HUMAN	R.AFQPFFVELTM(+15.99)PYSVIR.G	N	58.48	2060.04	0.8	1031.03	2	77.47	F16:12287	2	788	804	Oxidation (M)
2	2	P01023|A2MG_HUMAN	K.ALLAYAFALAGNQDKRK.E	Y	58.46	1849.02	0.6	925.518	2	55.13	F16:8789	4	1148	1164
2	2	P01023|A2MG_HUMAN	R.TGTHGLLVKQEDM(+15.99)K.G	Y	58.42	1571.8	0.1	786.906	2	24.17	F16:2792	6	508	521	Oxidation (M)
2	2	P01023|A2MG_HUMAN	K.DTVIKPLLVEPEGLEKETTFNSLLC(+105.06)PSGGEVSEELSLKLPPNVVEESAR.A	Y	57.56	5396.79	0.4	1350.21	4	87.7	F16:13575	33	897	945	S-pyridylethylation
2	2	P01023|A2MG_HUMAN	K.VYDYYETDEFAIAEYNAPC(+105.06)SKDLGNA	Y	57.34	3065.33	1.4	1022.78	3	54.02	F19:5871	6	1449	1474	S-pyridylethylation
2	2	P01023|A2MG_HUMAN	K.LSFVKVDSHFR.Q	Y	57.19	1333.71	-1.4	667.864	2	38.54	F16:5632	6	350	360
2	2	P01023|A2MG_HUMAN	R.NALFC(+105.06)LESAWK.T	Y	57.13	1385.68	-0.1	693.847	2	53.61	F17:8013	9	1123	1133	S-pyridylethylation
2	2	P01023|A2MG_HUMAN	K.FEVQVTVPK.I	Y	56.11	1045.58	-2.4	523.796	2	42.49	F17:6179	4	229	237
2	2	P01023|A2MG_HUMAN	K.ETTFNSLLC(+105.06)PSGGEVSEELSLKLPPNVVEESAR.A	Y	55.87	3635.8	1.1	1212.94	3	60.43	F16:9721	12	913	945	S-pyridylethylation
2	2	P01023|A2MG_HUMAN	K.FRVVSM(+15.99)DENFHPLNELIPLVYIQDPK.G	Y	55.59	3128.6	1.6	1043.88	3	69.09	F16:11093	4	146	171	Oxidation (M)
2	2	P01023|A2MG_HUMAN	K.DM(+15.99)YSFLEDMGLK.A	Y	55.32	1463.63	-0.5	732.822	2	75.06	F16:11958	1	665	676	Oxidation (M)
2	2	P01023|A2MG_HUMAN	K.SGGRTEHPFTVEEFVLPKFEVQVTVPK.I	Y	54.9	3056.6	0.7	1019.87	3	59.92	F16:9634	7	211	237
2	2	P01023|A2MG_HUMAN	K.SIYKPGQTVK.F	Y	54.34	1119.63	-0.3	560.822	2	20.59	F17:2272	9	136	145
2	2	P01023|A2MG_HUMAN	K.YDVENC(+105.06)LANK.V	Y	53.96	1272.58	-0.8	637.297	2	31.25	F16:4167	4	558	567	S-pyridylethylation
2	2	P01023|A2MG_HUMAN	K.EVLKSLNEEAVKK.D	Y	53.8	1485.84	0.1	743.927	2	26.52	F16:3240	6	1165	1177
2	2	P01023|A2MG_HUMAN	K.GVPIPNKVIFIR.G	Y	53.04	1351.83	-0.2	676.924	2	48.63	F16:7596	9	376	387
2	2	P01023|A2MG_HUMAN	R.LLIYAVLPTGDVIGDSAKYDVENC(+105.06)LANK.V	Y	52.38	3098.6	1.3	1033.88	3	63.28	F17:9547	6	540	567	S-pyridylethylation
2	2	P01023|A2MG_HUMAN	K.ATVLNYLPK.C	N	52.33	1017.59	-1	509.8	2	48.2	F16:7514	2	812	820
2	2	P01023|A2MG_HUMAN	R.KDTVIKPLLVEPEGLEKETTFNSLLC(+105.06)PSGGEVSEELSLK.L	Y	52.2	4333.27	2.2	1084.33	4	59.27	F16:9520	2	896	934	S-pyridylethylation
2	2	P01023|A2MG_HUMAN	R.SASNMAIVDVK.M	Y	52.19	1133.58	-0.8	567.794	2	35.74	F17:4957	10	1374	1384
2	2	P01023|A2MG_HUMAN	R.TTVMVKNEDSLVFVQTDK.S	Y	52.04	2053.04	0.2	685.354	3	97.67	F18:11282	11	118	135
2	2	P01023|A2MG_HUMAN	R.VTAAPQSVC(+105.06)ALR.A	Y	51.75	1319.7	0.8	660.859	2	29.17	F18:3251	13	587	598	S-pyridylethylation
2	2	P01023|A2MG_HUMAN	K.MC(+105.06)PQLQQYEMHGPEGLRVGFYESDVMGR.G	Y	50.24	3361.51	0.4	1121.51	3	52.22	F16:8267	10	688	715	S-pyridylethylation
2	2	P01023|A2MG_HUMAN	R.QGIPFFGQVR.L	Y	49.81	1147.61	0.4	574.814	2	55.49	F17:8325	6	361	370
2	2	P01023|A2MG_HUMAN	K.DMYSFLEDMGLKAFTNSK.I	Y	48.61	2095.96	0.2	699.661	3	77.7	F16:12320	4	665	682
2	2	P01023|A2MG_HUMAN	K.DNSVHWERPQKPK.A	Y	47.77	1619.82	-1.6	810.914	2	22.02	F16:2416	10	1178	1190
2	2	P01023|A2MG_HUMAN	R.HNVYINGITYTPVSSTNEKDMYSFLEDMGLKAFTNSK.I	Y	47.43	4214	3.4	1054.51	4	70.24	F16:11262	2	646	682
2	2	P01023|A2MG_HUMAN	R.SASNM(+15.99)AIVDVK.M	Y	47.43	1149.57	-0.9	575.792	2	35.7	F19:3715	6	1374	1384	Oxidation (M)
2	2	P01023|A2MG_HUMAN	K.GHFSISIPVK.S	Y	46.69	1083.61	-1.7	542.81	2	42.62	F16:6439	3	522	531
2	2	P01023|A2MG_HUMAN	K.KSGGRTEHPFTVEEFVLPK.F	Y	46.56	2157.12	-1.2	540.287	4	46.02	F16:7099	3	210	228
2	2	P01023|A2MG_HUMAN	K.SDIAPVAR.L	Y	46.21	827.45	-0.3	414.732	2	19.52	F16:2025	2	532	539
2	2	P01023|A2MG_HUMAN	R.DLKPAIVKVYDYYETDEFAIAEYNAPC(+105.06)SK.D	Y	46.13	3459.66	1.2	865.923	4	62.45	F17:9421	2	1441	1469	S-pyridylethylation
2	2	P01023|A2MG_HUMAN	R.SASNMAIVDVKMVSGFIPLKPTVK.M	Y	45.45	2531.39	0.9	844.803	3	62.83	F18:8040	3	1374	1397
2	2	P01023|A2MG_HUMAN	R.TEHPFTVEEFVLPKFEVQVTVPK.I	Y	43.98	2699.42	0.3	675.863	4	63.12	F16:10163	8	215	237
2	2	P01023|A2MG_HUMAN	R.TGTHGLLVK.Q	Y	43.77	924.539	-0.9	463.276	2	21.25	F16:2293	4	508	516
2	2	P01023|A2MG_HUMAN	R.TITKLSFVK.V	Y	43.5	1035.63	-0.8	518.823	2	35.89	F16:5102	4	346	354
2	2	P01023|A2MG_HUMAN	R.KDTVIKPLLVEPEGLEKETTFNSLLC(+105.06)PSGGEVSEELSLKLPPNVVEESAR.A	Y	43.41	5524.89	-2.2	1382.23	4	61.66	F16:9925	2	896	945	S-pyridylethylation
2	2	P01023|A2MG_HUMAN	K.TKVFQLKR.K	Y	41.66	1018.63	-1.3	510.321	2	21.32	F16:2305	4	306	313
2	2	P01023|A2MG_HUMAN	R.VVSMDENFHPLNELIPLVYIQDPKGNR.I	Y	41.48	3136.6	1.2	785.159	4	66.46	F16:10678	4	148	174
2	2	P01023|A2MG_HUMAN	K.SLNEEAVKK.D	Y	41.3	1016.55	-1	509.282	2	9.24	F16:925	6	1169	1177
2	2	P01023|A2MG_HUMAN	R.KYSDASDC(+105.06)HGEDSQAFC(+105.06)EK.F	Y	41.24	2328.94	-0.6	777.321	3	20.9	F16:2236	9	271	289	S-pyridylethylation
2	2	P01023|A2MG_HUMAN	R.DLKPAIVK.V	Y	40.83	882.554	0	442.284	2	26.58	F18:2859	12	1441	1448
2	2	P01023|A2MG_HUMAN	K.FQVDNNNR.L	Y	40.72	1005.46	-1.6	503.738	2	9.52	F16:983	2	1290	1297
2	2	P01023|A2MG_HUMAN	K.YSDASDC(+105.06)HGEDSQAFC(+105.06)EK.F	Y	38.92	2200.85	0.8	734.623	3	22.19	F16:2443	4	272	289	S-pyridylethylation
2	2	P01023|A2MG_HUMAN	K.M(+15.99)C(+105.06)PQLQQYEMHGPEGLR.V	Y	38.21	2136.95	-0.9	713.325	3	40.23	F19:4272	2	688	704	Oxidation (M); S-pyridylethylation
2	2	P01023|A2MG_HUMAN	R.TTVM(+15.99)VKNEDSLVFVQTDK.S	Y	38.21	2069.04	2	690.687	3	45.95	F19:4923	2	118	135	Oxidation (M)
2	2	P01023|A2MG_HUMAN	K.AFTNSK.I	Y	36.87	666.334	0.1	334.174	2	8.27	F16:768	4	677	682
2	2	P01023|A2MG_HUMAN	R.SNHVSR.T	Y	36.02	698.346	-0.1	350.18	2	5.2	F16:427	5	1402	1407
2	2	P01023|A2MG_HUMAN	R.QSSEITR.T	N	35.16	819.409	0.5	410.712	2	8.4	F16:787	3	339	345
2	2	P01023|A2MG_HUMAN	R.QTVSWAVTPK.S	Y	34.71	1115.6	-0.4	558.806	2	37.4	F18:4533	13	854	863
2	2	P01023|A2MG_HUMAN	K.FSGQLNSHGC(+105.06)FYQQVK.T	Y	33.7	1946.91	0.6	649.977	3	33.28	F16:4581	14	290	305	S-pyridylethylation
2	2	P01023|A2MG_HUMAN	K.QFSFPLSSEPFQGSYKVVVQK.K	Y	33.56	2401.23	0.8	801.418	3	56.99	F16:9117	2	189	209
2	2	P01023|A2MG_HUMAN	K.FRVVSMDENFHPLNELIPLVYIQDPKGNR.I	Y	33.3	3439.77	2.5	860.952	4	65.54	F16:10531	3	146	174
2	2	P01023|A2MG_HUMAN	K.SSSNEEVMFLTVQVKGPTQEFK.K	Y	33.13	2484.22	-1.1	829.08	3	55.17	F16:8796	2	94	115
2	2	P01023|A2MG_HUMAN	K.QFSFPLSSEPFQGSYKVVVQKK.S	Y	32.85	2529.33	0.1	633.339	4	53.11	F16:8426	1	189	210
2	2	P01023|A2MG_HUMAN	K.TKVFQLK.R	Y	32.3	862.528	0.9	432.272	2	27	F16:3338	4	306	312
2	2	P01023|A2MG_HUMAN	R.GEAFTLK.A	Y	32	764.407	0.6	383.211	2	32.28	F16:4380	2	805	811
2	2	P01023|A2MG_HUMAN	R.NQGNTWLTAFVLKTFAQARAYIFIDEAHITQALIWLSQR.Q	Y	31.9	4534.39	3	1134.61	4	98.97	F17:13976	2	1035	1073
2	2	P01023|A2MG_HUMAN	R.SASNM(+15.99)AIVDVKM(+15.99)VSGFIPLKPTVK.M	Y	29.54	2563.38	-3.6	855.463	3	62.97	F18:8057	2	1374	1397	Oxidation (M)
2	2	P01023|A2MG_HUMAN	K.VVVQKK.S	Y	26	699.464	0	350.739	2	4.13	F16:331	10	205	210
2	2	P01023|A2MG_HUMAN	K.LSFVK.V	Y	24.86	592.358	1.1	297.187	2	30.12	F16:3954	1	350	354
2	2	P01023|A2MG_HUMAN	K.GGVEDEVTLSAYITIALLEIPLTVTHPVVRNALFC(+105.06)LESAWK.T	Y	24.39	4572.43	3.9	1144.12	4	99.01	F18:11438	1	1093	1133	S-pyridylethylation
2	2	P01023|A2MG_HUMAN	R.NQGNTWLTAFVLKTFAQARAYIFIDEAHITQALIWLSQRQK.D	Y	23.8	4790.54	1.2	1198.64	4	98.85	F17:13957	2	1035	1075
2	2	P01023|A2MG_HUMAN	R.TTVM(+15.99)VKNEDSLVFVQTDKSIYKPGQTVK.F	Y	23.33	3170.65	-2.1	793.669	4	111.35	F19:11341	1	118	145	Oxidation (M)
2	2	P01023|A2MG_HUMAN	K.RKEVLK.S	Y	22.63	771.497	1.2	258.173	3	8.08	F16:734	4	1163	1168
4	7	P0C0L5|CO4B_HUMAN	R.ALEILQEEDLIDEDDIPVR.S	N	141.02	2224.11	-0.1	1113.06	2	62.57	F20:5336	20	757	775
4	7	P0C0L5|CO4B_HUMAN	K.AINEKLGQYASPTAK.R	N	131.6	1589.84	0	795.928	2	30.79	F19:3100	10	686	700
4	7	P0C0L5|CO4B_HUMAN	K.AINEKLGQYASPTAKR.C	N	115.69	1745.94	-1.2	873.977	2	28.39	F19:2779	13	686	701
4	7	P0C0L5|CO4B_HUMAN	R.VTASDPLDTLGSEGALSPGGVASLLR.L	N	108.6	2482.29	0.4	1242.15	2	69.2	F18:8755	14	980	1005
4	7	P0C0L5|CO4B_HUMAN	R.GLEEELQFSLGSK.I	N	100.46	1435.72	0.8	718.868	2	55.69	F18:7117	45	1353	1365
4	7	P0C0L5|CO4B_HUMAN	R.EC(+105.06)VGFEAVQEVPVGLVQPASATLYDYYNPER.R	N	100.03	3547.7	0.7	1183.57	3	64.78	F19:7144	6	1534	1564	S-pyridylethylation
4	7	P0C0L5|CO4B_HUMAN	R.TTNIQGINLLFSSR.R	N	99.15	1562.84	0.2	782.428	2	59.41	F19:6531	9	124	137
4	7	P0C0L5|CO4B_HUMAN	K.EGAIHREELVYELNPLDHR.G	N	94.23	2289.15	-0.3	764.057	3	48.13	F18:6082	9	936	954
4	7	P0C0L5|CO4B_HUMAN	K.VLSLAQEQVGGSPEK.L	N	88.28	1540.81	-1.5	771.411	2	36.46	F17:5089	4	1085	1099
4	7	P0C0L5|CO4B_HUMAN	K.M(+15.99)RPSTDTITVM(+15.99)VENSHGLR.V	N	87.72	2175.04	1.5	726.022	3	45.57	F18:5730	5	167	185	Oxidation (M)
4	7	P0C0L5|CO4B_HUMAN	R.GHLFLQTDQPIYNPGQR.V	N	86.84	1983	-0.5	992.505	2	44.88	F16:6884	5	139	155
4	7	P0C0L5|CO4B_HUMAN	K.VLQIEKEGAIHREELVYELNPLDHR.G	N	84.07	2999.58	0.6	1000.87	3	52.44	F18:6674	10	930	954
4	7	P0C0L5|CO4B_HUMAN	R.GSFEFPVGDAVSK.V	N	84.05	1338.65	0.8	670.331	2	48.83	F18:6179	7	917	929
4	7	P0C0L5|CO4B_HUMAN	K.ASAGLLGAHAAAITAYALTLTK.A	N	83.17	2084.16	-2	695.727	3	65.77	F20:5610	8	1183	1204
4	7	P0C0L5|CO4B_HUMAN	R.YIYGKPVQGVAYVR.F	N	83.07	1611.88	1	806.947	2	37.05	F16:5338	2	270	283
4	7	P0C0L5|CO4B_HUMAN	K.LGQYASPTAK.R	N	82.3	1034.54	-1.2	518.277	2	22.1	F19:1978	6	691	700
4	7	P0C0L5|CO4B_HUMAN	R.GPEVQLVAHSPWLK.D	N	82.29	1559.85	-1	780.929	2	49.11	F16:7692	4	105	118
4	7	P0C0L5|CO4B_HUMAN	K.MRPSTDTITVMVENSHGLR.V	N	81.69	2143.05	0.3	715.358	3	45.93	F17:6769	8	167	185
4	7	P0C0L5|CO4B_HUMAN	R.NVNFQKAINEK.L	N	81.2	1303.69	0.5	652.852	2	30.18	F19:3021	4	680	690
4	7	P0C0L5|CO4B_HUMAN	K.VFEAMNSYDLGC(+105.06)GPGGGDSALQVFQAAGLAFSDGDQWTLSR.K	N	80.49	4341.97	1.3	1448.33	3	76.61	F17:11371	8	624	664	S-pyridylethylation
4	7	P0C0L5|CO4B_HUMAN	R.NVNFQKAINEKLGQYASPTAK.R	N	79.46	2320.22	0.3	774.413	3	45.54	F19:4876	2	680	700
4	7	P0C0L5|CO4B_HUMAN	R.GC(+105.06)GEQTM(+15.99)IYLAPTLAASR.Y	N	79.39	2001.97	0.7	1001.99	2	50.33	F17:7490	4	1009	1026	S-pyridylethylation; Oxidation (M)
4	7	P0C0L5|CO4B_HUMAN	R.NGFKSHALQLNNR.Q	N	79.38	1497.78	-2	500.266	3	25.41	F18:2678	2	1337	1349
4	7	P0C0L5|CO4B_HUMAN	K.LGQYASPTAKR.C	N	78.24	1190.64	-0.2	596.327	2	19.86	F19:1702	10	691	701
4	7	P0C0L5|CO4B_HUMAN	R.YVSHFETEGPHVLLYFDSVPTSR.E	N	76.35	2679.3	1.1	894.107	3	55.8	F17:8373	4	1511	1533
4	7	P0C0L5|CO4B_HUMAN	K.VDFTLSSERDFALLSLQVPLKDAK.S	N	75.94	2691.45	0.7	898.157	3	64.77	F18:8269	10	72	95
4	7	P0C0L5|CO4B_HUMAN	K.M(+15.99)RPSTDTITVMVENSHGLR.V	N	73.77	2159.05	0.5	720.69	3	45.98	F17:6777	4	167	185	Oxidation (M)
4	7	P0C0L5|CO4B_HUMAN	R.TLEIPGNSDPNMIPDGDFNSYVR.V	N	72.46	2550.17	0.7	1276.09	2	56.42	F16:9014	8	957	979
4	7	P0C0L5|CO4B_HUMAN	R.TLEIPGNSDPNM(+15.99)IPDGDFNSYVR.V	N	72.22	2566.16	0.9	1284.09	2	53.87	F17:8057	5	957	979	Oxidation (M)
4	7	P0C0L5|CO4B_HUMAN	R.VGDTLNLNLR.A	N	72.05	1113.61	-0.1	557.814	2	43.66	F18:5464	5	485	494
4	7	P0C0L5|CO4B_HUMAN	K.MRPSTDTITVM(+15.99)VENSHGLR.V	N	71.87	2159.05	-1.1	720.689	3	45.94	F17:6771	4	167	185	Oxidation (M)
4	7	P0C0L5|CO4B_HUMAN	R.GLEEELQFSLGSKINVK.V	N	69.8	1890.01	4.9	946.017	2	62.12	F18:7951	8	1353	1369
4	7	P0C0L5|CO4B_HUMAN	R.STQDTVIALDALSAYWIASHTTEER.G	N	69.46	2777.35	-1.3	1389.68	2	75.03	F17:11167	5	1301	1325
4	7	P0C0L5|CO4B_HUMAN	R.EAPKVVEEQESR.V	N	69.17	1399.69	-0.5	700.854	2	20.36	F17:2233	7	1454	1465
4	7	P0C0L5|CO4B_HUMAN	R.KADGSYAAWLSR.G	N	68.93	1323.66	1.5	662.837	2	41.2	F16:6162	2	1061	1072
4	7	P0C0L5|CO4B_HUMAN	R.YLDKTEQWSTLPPETKDHAVDLIQK.G	N	68.31	2954.5	-2.3	985.839	3	44.9	F17:6607	4	1027	1051
4	7	P0C0L5|CO4B_HUMAN	K.LQETSNWLLSQQQADGSFQDLSPVIHR.S	Y	68.18	3096.53	2.1	1033.18	3	58.59	F16:9406	7	1100	1126
4	7	P0C0L5|CO4B_HUMAN	K.VGGNSKGTLK.V	N	67.11	959.54	-0.7	480.777	2	8.22	F18:701	5	1370	1379
4	7	P0C0L5|CO4B_HUMAN	K.LNMGITDLQGLR.L	N	66.53	1329.71	0.4	665.861	2	52.78	F16:8365	2	326	337
4	7	P0C0L5|CO4B_HUMAN	R.C(+105.06)SVFYGAPSKSR.L	N	66.24	1405.68	-1.1	469.567	3	23.76	F18:2428	2	1566	1577	S-pyridylethylation
4	7	P0C0L5|CO4B_HUMAN	R.AAC(+105.06)AQLNDFLQEYGTQGC(+105.06)QV	N	65.21	2368.06	2.2	1185.04	2	53.55	F17:8004	9	1725	1744	S-pyridylethylation
4	7	P0C0L5|CO4B_HUMAN	R.LLLFSPSVVHLGVPLSVGVQLQDVPR.G	N	65.01	2768.6	1.2	923.874	3	72.55	F18:9118	7	23	48
4	7	P0C0L5|CO4B_HUMAN	K.ITPGKPYILTVPGHLDEMQLDIQAR.Y	N	64.17	2804.49	-0.2	935.837	3	56.49	F16:9025	6	245	269
4	7	P0C0L5|CO4B_HUMAN	K.AEFQDALEKLNMGITDLQGLR.L	N	63.9	2361.2	0.4	788.074	3	69.42	F16:11139	4	317	337
4	7	P0C0L5|CO4B_HUMAN	R.GLQDEDGYR.M	N	63.75	1051.46	-1.1	526.735	2	23.05	F18:2318	8	1605	1613
4	7	P0C0L5|CO4B_HUMAN	K.LHLETDSLALVALGALDTALYAAGSK.S	N	63.46	2612.41	0.6	871.81	3	90.18	F19:9416	6	589	614
4	7	P0C0L5|CO4B_HUMAN	K.DHAVDLIQK.G	N	62.89	1037.55	-1.7	519.782	2	27.93	F17:3548	6	1043	1051
4	7	P0C0L5|CO4B_HUMAN	R.EC(+105.06)VGFEAVQEVPVGLVQPASATLYDYYNPERR.C	N	62.84	3703.8	2.1	1235.61	3	62.14	F17:9375	9	1534	1565	S-pyridylethylation
4	7	P0C0L5|CO4B_HUMAN	K.ITQVLHFTK.D	N	62.51	1085.62	0	543.819	2	35.16	F17:4856	4	1647	1655
4	7	P0C0L5|CO4B_HUMAN	R.DFALLSLQVPLKDAK.S	N	62.47	1656.94	0.9	829.481	2	61.15	F16:9840	6	81	95
4	7	P0C0L5|CO4B_HUMAN	R.GC(+105.06)GEQTMIYLAPTLAASR.Y	N	61.87	1985.97	-4.3	993.988	2	50.09	F16:7870	6	1009	1026	S-pyridylethylation
4	7	P0C0L5|CO4B_HUMAN	K.EVYMPSSIFQDDFVIPDISEPGTWK.I	N	61.18	2899.36	2.8	1450.69	2	75.41	F16:12008	2	190	214
4	7	P0C0L5|CO4B_HUMAN	K.SHALQLNNR.Q	N	60.9	1051.55	-1.3	526.783	2	18.88	F17:1994	3	1341	1349
4	7	P0C0L5|CO4B_HUMAN	R.KKEVYMPSSIFQDDFVIPDISEPGTWK.I	N	60.49	3155.55	2.6	1052.86	3	65.47	F16:10519	7	188	214
4	7	P0C0L5|CO4B_HUMAN	R.EMSGSPASGIPVK.V	N	59.97	1258.62	-1.2	630.318	2	32.17	F17:4315	4	392	404
4	7	P0C0L5|CO4B_HUMAN	K.VLSLAQEQVGGSPEKLQETSNWLLSQQQADGSFQDLSPVIHR.S	Y	59.54	4619.33	2.3	1155.84	4	62.82	F17:9475	4	1085	1126
4	7	P0C0L5|CO4B_HUMAN	K.VGGNSKGTLKVLR.T	N	59.36	1327.79	0	664.904	2	21.62	F18:2103	5	1370	1382
4	7	P0C0L5|CO4B_HUMAN	R.SFFPENWLWR.V	N	58.72	1380.66	-1.9	691.337	2	69.16	F18:8751	2	776	785
4	7	P0C0L5|CO4B_HUMAN	R.GSSTWLTAFVLK.V	Y	58.52	1308.71	0.8	655.362	2	66.21	F18:8432	2	1073	1084
4	7	P0C0L5|CO4B_HUMAN	R.RGHLFLQTDQPIYNPGQR.V	N	56.71	2139.1	1.1	1070.56	2	40.61	F16:6044	3	138	155
4	7	P0C0L5|CO4B_HUMAN	K.LTSLSDRYVSHFETEGPHVLLYFDSVPTSR.E	N	56.45	3451.7	1.1	863.934	4	59.91	F17:9033	2	1504	1533
4	7	P0C0L5|CO4B_HUMAN	R.SMQGGLVGNDETVALTAFVTIALHHGLAVFQDEGAEPLK.Q	N	56.35	4035.04	-0.9	1009.77	4	89.21	F17:12883	4	1127	1165
4	7	P0C0L5|CO4B_HUMAN	R.GPEVQLVAHSPWLKDSLSR.T	N	56.02	2118.12	-1.2	707.047	3	49.88	F16:7831	4	105	123
4	7	P0C0L5|CO4B_HUMAN	R.QGSFQGGFR.S	N	55.2	982.462	-0.1	492.238	2	29.31	F19:2905	5	1292	1300
4	7	P0C0L5|CO4B_HUMAN	R.LLLFSPSVVHLGVPLSVGVQLQDVPRGQVVK.G	N	54.84	3279.91	0.5	1094.31	3	67.64	F16:10867	5	23	53
4	7	P0C0L5|CO4B_HUMAN	R.GRTLEIPGNSDPNMIPDGDFNSYVR.V	N	53.83	2763.29	0.3	922.105	3	52.44	F16:8305	4	955	979
4	7	P0C0L5|CO4B_HUMAN	R.QRAAC(+105.06)AQLNDFLQEYGTQGC(+105.06)QV	N	53.27	2652.22	0.1	885.081	3	50.76	F19:5484	6	1723	1744	S-pyridylethylation
4	7	P0C0L5|CO4B_HUMAN	R.C(+105.06)SVFYGAPSK.S	N	52.08	1162.55	-1.9	582.28	2	28.75	F17:3691	4	1566	1575	S-pyridylethylation
4	7	P0C0L5|CO4B_HUMAN	R.RC(+105.06)SVFYGAPSK.S	N	51.81	1318.65	0.1	440.557	3	24.45	F18:2535	5	1565	1575	S-pyridylethylation
4	7	P0C0L5|CO4B_HUMAN	R.GLQDEDGYRMK.F	N	51.51	1310.59	0.6	656.304	2	26.69	F19:2556	3	1605	1615
4	7	P0C0L5|CO4B_HUMAN	K.AEFQDALEKLNM(+15.99)GITDLQGLR.L	N	50.94	2377.19	1	793.406	3	69.62	F16:11168	1	317	337	Oxidation (M)
4	7	P0C0L5|CO4B_HUMAN	R.NVNFQKAINEKLGQYASPTAKR.C	N	50.23	2476.32	1.5	620.088	4	43.92	F19:4698	2	680	701
4	7	P0C0L5|CO4B_HUMAN	R.NPSDPMPQAPALWIETTAYALLHLLLHEGKAEMADQAAAWLTR.Q	Y	50.17	4740.38	2.3	1186.11	4	98.99	F16:14909	2	1249	1291
4	7	P0C0L5|CO4B_HUMAN	R.VEYGFQVK.V	N	49.96	968.497	-1.5	485.255	2	36.74	F17:5138	3	1623	1630
4	7	P0C0L5|CO4B_HUMAN	R.FGLLDEDGKK.T	N	49.94	1120.58	-0.3	561.295	2	35.65	F16:5052	4	284	293
4	7	P0C0L5|CO4B_HUMAN	R.EM(+15.99)SGSPASGIPVK.V	N	49.78	1274.62	-0.9	638.316	2	32.12	F17:4306	4	392	404	Oxidation (M)
4	7	P0C0L5|CO4B_HUMAN	R.LPMMR.S	N	48.52	646.33	1.7	324.173	2	29.47	F19:2926	6	710	714
4	7	P0C0L5|CO4B_HUMAN	R.HLVPGAPFLLQALVR.E	N	48.14	1629.97	-0.8	544.331	3	67.45	F16:10837	8	377	391
4	7	P0C0L5|CO4B_HUMAN	K.KYVLPNFEVK.I	N	47.51	1235.69	-0.7	618.852	2	44.27	F16:6762	4	235	244
4	7	P0C0L5|CO4B_HUMAN	K.AAANQMR.N	N	46.43	760.365	0.8	381.19	2	6.16	F17:546	2	1659	1665
4	7	P0C0L5|CO4B_HUMAN	R.VQQPDC(+105.06)REPFLSC(+105.06)C(+105.06)QFAESLR.K	N	46.41	2770.28	0.6	924.435	3	45.56	F17:6709	14	723	743	S-pyridylethylation
4	7	P0C0L5|CO4B_HUMAN	R.VTASDPLDTLGSEGALSPGGVASLLRLPR.G	N	46.23	2848.53	0.4	950.517	3	71.05	F17:10667	4	980	1008
4	7	P0C0L5|CO4B_HUMAN	K.SHKPLNMGK.V	N	45.74	1010.53	-1.2	506.273	2	8.26	F16:766	2	615	623
4	7	P0C0L5|CO4B_HUMAN	R.YLDKTEQWSTLPPETKDHAVDLIQKGYMR.I	N	45.73	3461.73	0.1	866.439	4	48.18	F16:7510	1	1027	1055
4	7	P0C0L5|CO4B_HUMAN	R.LRLEPGKEYLIMGLDGATYDLEGHPQYLLDSNSWIEEMPSER.L	N	45.47	4864.34	1.4	1217.09	4	69.47	F17:10447	3	1675	1716
4	7	P0C0L5|CO4B_HUMAN	K.LELSVDGAK.Q	N	44.83	930.502	-0.5	466.258	2	35	F16:4917	2	571	579
4	7	P0C0L5|CO4B_HUMAN	K.YVLPNFEVK.I	N	44.34	1107.6	-0.6	554.805	2	50.34	F16:7915	4	236	244
4	7	P0C0L5|CO4B_HUMAN	R.VFALDQK.M	N	43.84	819.449	1.8	410.733	2	32.46	F16:4416	4	160	166
4	7	P0C0L5|CO4B_HUMAN	K.SC(+105.06)GLHQLLR.G	N	43.42	1130.6	-0.1	566.308	2	29.34	F16:3810	4	96	104	S-pyridylethylation
4	7	P0C0L5|CO4B_HUMAN	R.NGESVKLHLETDSLALVALGALDTALYAAGSK.S	N	43.29	3226.71	-3.3	807.682	4	87.36	F19:9179	3	583	614
4	7	P0C0L5|CO4B_HUMAN	R.YRVFALDQK.M	N	41.44	1138.61	0.2	380.545	3	37.05	F17:5194	10	158	166
4	7	P0C0L5|CO4B_HUMAN	R.FGLLDEDGKKTFFR.G	N	40.95	1671.86	-2.2	558.293	3	48.45	F16:7560	3	284	297
4	7	P0C0L5|CO4B_HUMAN	K.LTSLSDR.Y	N	40.13	790.418	0.7	396.217	2	20.31	F17:2224	2	1504	1510
4	7	P0C0L5|CO4B_HUMAN	K.VSATVSSPGSVPEVQDIQQNTDGSGQVSIPIIIPQTISELQLSVSAGSPHPAIAR.L	N	39.85	5561.89	-3.5	1391.47	4	75.75	F16:12056	2	405	459
4	7	P0C0L5|CO4B_HUMAN	R.DKGQAGLQR.A	N	38.61	971.515	-2	486.764	2	8.24	F16:764	4	748	756
4	7	P0C0L5|CO4B_HUMAN	R.LLATLC(+105.06)SAEVC(+105.06)QC(+105.06)AEGK.C	N	37.46	2052.98	-1.9	685.334	3	37.59	F17:5302	5	1578	1594	S-pyridylethylation
4	7	P0C0L5|CO4B_HUMAN	R.NPSDPMPQAPALWIETTAYALLHLLLHEGK.A	N	35.66	3325.72	1.2	832.438	4	99.02	F16:14915	1	1249	1278
4	7	P0C0L5|CO4B_HUMAN	R.LTVAAPPSGGPGFLSIERPDSRPPR.V	N	35.61	2573.37	1.3	858.799	3	47.37	F17:6996	8	460	484
4	7	P0C0L5|CO4B_HUMAN	K.SC(+105.06)GLHQLLRGPEVQLVAHSPWLKDSLSR.T	N	34.55	3230.71	-0.7	808.685	4	56.14	F16:8966	2	96	123	S-pyridylethylation
4	7	P0C0L5|CO4B_HUMAN	R.LPM(+15.99)MR.S	N	34.45	662.324	1.6	332.17	2	29.62	F19:2947	3	710	714	Oxidation (M)
4	7	P0C0L5|CO4B_HUMAN	K.VLQIEK.E	N	32.89	728.443	1.1	365.229	2	24.82	F16:2918	4	930	935
4	7	P0C0L5|CO4B_HUMAN	R.NFLVR.A	N	31.99	647.375	0.5	324.695	2	33.13	F17:4503	2	1666	1670
4	7	P0C0L5|CO4B_HUMAN	K.ADGSYAAWLSR.G	N	31.81	1195.56	-0.6	598.788	2	46.99	F16:7280	2	1062	1072
4	7	P0C0L5|CO4B_HUMAN	R.VEASISK.A	N	30.21	732.402	0.8	367.208	2	9.54	F17:965	2	1168	1174
4	7	P0C0L5|CO4B_HUMAN	K.GTLKVLR.T	N	28.99	785.512	-0.3	393.763	2	22.4	F18:2224	2	1376	1382
4	7	P0C0L5|CO4B_HUMAN	R.LSC(+105.06)PK.E	N	28.98	651.341	0.9	326.678	2	9.14	F16:902	1	667	671	S-pyridylethylation
4	7	P0C0L5|CO4B_HUMAN	R.RALER.G	N	28.01	643.376	0.4	322.696	2	4.92	F17:414	5	1600	1604
4	7	P0C0L5|CO4B_HUMAN	K.FAC(+105.06)YYPR.V	N	27.57	1023.46	0.6	512.739	2	30.25	F17:3971	4	1616	1622	S-pyridylethylation
4	7	P0C0L5|CO4B_HUMAN	R.LEPGKEYLIMGLDGATYDLEGHPQYLLDSNSWIEEMPSER.L	N	26.41	4595.15	4.5	1149.8	4	68	F17:10246	3	1677	1716
4	7	P0C0L5|CO4B_HUMAN	K.ASSFLGEK.A	Y	25.68	837.423	0.3	419.719	2	28.67	F17:3676	4	1175	1182
4	7	P0C0L5|CO4B_HUMAN	R.LPMM(+15.99)R.S	N	24.48	662.324	-0.2	332.169	2	19.45	F19:1654	3	710	714	Oxidation (M)
4	7	P0C0L5|CO4B_HUMAN	R.LPM(+15.99)M(+15.99)R.S	N	23.05	678.319	0.7	340.167	2	29.62	F17:3851	6	710	714	Oxidation (M)
4	7	P0C0L5|CO4B_HUMAN	R.IQQFR.K	N	22.61	690.381	1.2	346.198	2	14.76	F16:1457	4	1056	1060
4	7	P0C0L5|CO4B_HUMAN	R.SC(+105.06)EQR.A	N	22.17	726.312	0.4	364.163	2	5.37	F16:453	3	715	719	S-pyridylethylation
4	7	P0C0L5|CO4B_HUMAN	R.NVNFQK.A	N	20.7	748.387	1	375.201	2	17.66	F19:1456	3	680	685
5	8	P0C0L4|CO4A_HUMAN	R.ALEILQEEDLIDEDDIPVR.S	N	141.02	2224.11	-0.1	1113.06	2	62.57	F20:5336	20	757	775
5	8	P0C0L4|CO4A_HUMAN	K.AINEKLGQYASPTAK.R	N	131.6	1589.84	0	795.928	2	30.79	F19:3100	10	686	700
5	8	P0C0L4|CO4A_HUMAN	K.AINEKLGQYASPTAKR.C	N	115.69	1745.94	-1.2	873.977	2	28.39	F19:2779	13	686	701
5	8	P0C0L4|CO4A_HUMAN	R.VTASDPLDTLGSEGALSPGGVASLLR.L	N	108.6	2482.29	0.4	1242.15	2	69.2	F18:8755	14	980	1005
5	8	P0C0L4|CO4A_HUMAN	R.GLEEELQFSLGSK.I	N	100.46	1435.72	0.8	718.868	2	55.69	F18:7117	45	1353	1365
5	8	P0C0L4|CO4A_HUMAN	R.EC(+105.06)VGFEAVQEVPVGLVQPASATLYDYYNPER.R	N	100.03	3547.7	0.7	1183.57	3	64.78	F19:7144	6	1534	1564	S-pyridylethylation
5	8	P0C0L4|CO4A_HUMAN	R.TTNIQGINLLFSSR.R	N	99.15	1562.84	0.2	782.428	2	59.41	F19:6531	9	124	137
5	8	P0C0L4|CO4A_HUMAN	K.EGAIHREELVYELNPLDHR.G	N	94.23	2289.15	-0.3	764.057	3	48.13	F18:6082	9	936	954
5	8	P0C0L4|CO4A_HUMAN	K.VLSLAQEQVGGSPEK.L	N	88.28	1540.81	-1.5	771.411	2	36.46	F17:5089	4	1085	1099
5	8	P0C0L4|CO4A_HUMAN	K.M(+15.99)RPSTDTITVM(+15.99)VENSHGLR.V	N	87.72	2175.04	1.5	726.022	3	45.57	F18:5730	5	167	185	Oxidation (M)
5	8	P0C0L4|CO4A_HUMAN	R.GHLFLQTDQPIYNPGQR.V	N	86.84	1983	-0.5	992.505	2	44.88	F16:6884	5	139	155
5	8	P0C0L4|CO4A_HUMAN	K.VLQIEKEGAIHREELVYELNPLDHR.G	N	84.07	2999.58	0.6	1000.87	3	52.44	F18:6674	10	930	954
5	8	P0C0L4|CO4A_HUMAN	R.GSFEFPVGDAVSK.V	N	84.05	1338.65	0.8	670.331	2	48.83	F18:6179	7	917	929
5	8	P0C0L4|CO4A_HUMAN	K.ASAGLLGAHAAAITAYALTLTK.A	N	83.17	2084.16	-2	695.727	3	65.77	F20:5610	8	1183	1204
5	8	P0C0L4|CO4A_HUMAN	R.YIYGKPVQGVAYVR.F	N	83.07	1611.88	1	806.947	2	37.05	F16:5338	2	270	283
5	8	P0C0L4|CO4A_HUMAN	K.LGQYASPTAK.R	N	82.3	1034.54	-1.2	518.277	2	22.1	F19:1978	6	691	700
5	8	P0C0L4|CO4A_HUMAN	R.GPEVQLVAHSPWLK.D	N	82.29	1559.85	-1	780.929	2	49.11	F16:7692	4	105	118
5	8	P0C0L4|CO4A_HUMAN	K.MRPSTDTITVMVENSHGLR.V	N	81.69	2143.05	0.3	715.358	3	45.93	F17:6769	8	167	185
5	8	P0C0L4|CO4A_HUMAN	R.NVNFQKAINEK.L	N	81.2	1303.69	0.5	652.852	2	30.18	F19:3021	4	680	690
5	8	P0C0L4|CO4A_HUMAN	K.VFEAMNSYDLGC(+105.06)GPGGGDSALQVFQAAGLAFSDGDQWTLSR.K	N	80.49	4341.97	1.3	1448.33	3	76.61	F17:11371	8	624	664	S-pyridylethylation
5	8	P0C0L4|CO4A_HUMAN	R.NVNFQKAINEKLGQYASPTAK.R	N	79.46	2320.22	0.3	774.413	3	45.54	F19:4876	2	680	700
5	8	P0C0L4|CO4A_HUMAN	R.GC(+105.06)GEQTM(+15.99)IYLAPTLAASR.Y	N	79.39	2001.97	0.7	1001.99	2	50.33	F17:7490	4	1009	1026	S-pyridylethylation; Oxidation (M)
5	8	P0C0L4|CO4A_HUMAN	R.NGFKSHALQLNNR.Q	N	79.38	1497.78	-2	500.266	3	25.41	F18:2678	2	1337	1349
5	8	P0C0L4|CO4A_HUMAN	K.LGQYASPTAKR.C	N	78.24	1190.64	-0.2	596.327	2	19.86	F19:1702	10	691	701
5	8	P0C0L4|CO4A_HUMAN	R.YVSHFETEGPHVLLYFDSVPTSR.E	N	76.35	2679.3	1.1	894.107	3	55.8	F17:8373	4	1511	1533
5	8	P0C0L4|CO4A_HUMAN	K.VDFTLSSERDFALLSLQVPLKDAK.S	N	75.94	2691.45	0.7	898.157	3	64.77	F18:8269	10	72	95
5	8	P0C0L4|CO4A_HUMAN	K.M(+15.99)RPSTDTITVMVENSHGLR.V	N	73.77	2159.05	0.5	720.69	3	45.98	F17:6777	4	167	185	Oxidation (M)
5	8	P0C0L4|CO4A_HUMAN	R.TLEIPGNSDPNMIPDGDFNSYVR.V	N	72.46	2550.17	0.7	1276.09	2	56.42	F16:9014	8	957	979
5	8	P0C0L4|CO4A_HUMAN	R.TLEIPGNSDPNM(+15.99)IPDGDFNSYVR.V	N	72.22	2566.16	0.9	1284.09	2	53.87	F17:8057	5	957	979	Oxidation (M)
5	8	P0C0L4|CO4A_HUMAN	R.VGDTLNLNLR.A	N	72.05	1113.61	-0.1	557.814	2	43.66	F18:5464	5	485	494
5	8	P0C0L4|CO4A_HUMAN	K.MRPSTDTITVM(+15.99)VENSHGLR.V	N	71.87	2159.05	-1.1	720.689	3	45.94	F17:6771	4	167	185	Oxidation (M)
5	8	P0C0L4|CO4A_HUMAN	R.GLEEELQFSLGSKINVK.V	N	69.8	1890.01	4.9	946.017	2	62.12	F18:7951	8	1353	1369
5	8	P0C0L4|CO4A_HUMAN	R.STQDTVIALDALSAYWIASHTTEER.G	N	69.46	2777.35	-1.3	1389.68	2	75.03	F17:11167	5	1301	1325
5	8	P0C0L4|CO4A_HUMAN	K.LQETSNWLLSQQQADGSFQDPC(+105.06)PVLDR.S	Y	69.25	3179.5	1.4	1060.84	3	54.79	F16:8728	5	1100	1126	S-pyridylethylation
5	8	P0C0L4|CO4A_HUMAN	R.EAPKVVEEQESR.V	N	69.17	1399.69	-0.5	700.854	2	20.36	F17:2233	7	1454	1465
5	8	P0C0L4|CO4A_HUMAN	R.KADGSYAAWLSR.D	N	68.93	1323.66	1.5	662.837	2	41.2	F16:6162	2	1061	1072
5	8	P0C0L4|CO4A_HUMAN	R.YLDKTEQWSTLPPETKDHAVDLIQK.G	N	68.31	2954.5	-2.3	985.839	3	44.9	F17:6607	4	1027	1051
5	8	P0C0L4|CO4A_HUMAN	K.VGGNSKGTLK.V	N	67.11	959.54	-0.7	480.777	2	8.22	F18:701	5	1370	1379
5	8	P0C0L4|CO4A_HUMAN	K.LNMGITDLQGLR.L	N	66.53	1329.71	0.4	665.861	2	52.78	F16:8365	2	326	337
5	8	P0C0L4|CO4A_HUMAN	R.C(+105.06)SVFYGAPSKSR.L	N	66.24	1405.68	-1.1	469.567	3	23.76	F18:2428	2	1566	1577	S-pyridylethylation
5	8	P0C0L4|CO4A_HUMAN	R.AAC(+105.06)AQLNDFLQEYGTQGC(+105.06)QV	N	65.21	2368.06	2.2	1185.04	2	53.55	F17:8004	9	1725	1744	S-pyridylethylation
5	8	P0C0L4|CO4A_HUMAN	R.LLLFSPSVVHLGVPLSVGVQLQDVPR.G	N	65.01	2768.6	1.2	923.874	3	72.55	F18:9118	7	23	48
5	8	P0C0L4|CO4A_HUMAN	K.ITPGKPYILTVPGHLDEMQLDIQAR.Y	N	64.17	2804.49	-0.2	935.837	3	56.49	F16:9025	6	245	269
5	8	P0C0L4|CO4A_HUMAN	K.AEFQDALEKLNMGITDLQGLR.L	N	63.9	2361.2	0.4	788.074	3	69.42	F16:11139	4	317	337
5	8	P0C0L4|CO4A_HUMAN	R.GLQDEDGYR.M	N	63.75	1051.46	-1.1	526.735	2	23.05	F18:2318	8	1605	1613
5	8	P0C0L4|CO4A_HUMAN	K.LHLETDSLALVALGALDTALYAAGSK.S	N	63.46	2612.41	0.6	871.81	3	90.18	F19:9416	6	589	614
5	8	P0C0L4|CO4A_HUMAN	K.DHAVDLIQK.G	N	62.89	1037.55	-1.7	519.782	2	27.93	F17:3548	6	1043	1051
5	8	P0C0L4|CO4A_HUMAN	R.EC(+105.06)VGFEAVQEVPVGLVQPASATLYDYYNPERR.C	N	62.84	3703.8	2.1	1235.61	3	62.14	F17:9375	9	1534	1565	S-pyridylethylation
5	8	P0C0L4|CO4A_HUMAN	K.ITQVLHFTK.D	N	62.51	1085.62	0	543.819	2	35.16	F17:4856	4	1647	1655
5	8	P0C0L4|CO4A_HUMAN	R.DFALLSLQVPLKDAK.S	N	62.47	1656.94	0.9	829.481	2	61.15	F16:9840	6	81	95
5	8	P0C0L4|CO4A_HUMAN	R.GC(+105.06)GEQTMIYLAPTLAASR.Y	N	61.87	1985.97	-4.3	993.988	2	50.09	F16:7870	6	1009	1026	S-pyridylethylation
5	8	P0C0L4|CO4A_HUMAN	K.EVYMPSSIFQDDFVIPDISEPGTWK.I	N	61.18	2899.36	2.8	1450.69	2	75.41	F16:12008	2	190	214
5	8	P0C0L4|CO4A_HUMAN	K.SHALQLNNR.Q	N	60.9	1051.55	-1.3	526.783	2	18.88	F17:1994	3	1341	1349
5	8	P0C0L4|CO4A_HUMAN	R.KKEVYMPSSIFQDDFVIPDISEPGTWK.I	N	60.49	3155.55	2.6	1052.86	3	65.47	F16:10519	7	188	214
5	8	P0C0L4|CO4A_HUMAN	R.EMSGSPASGIPVK.V	N	59.97	1258.62	-1.2	630.318	2	32.17	F17:4315	4	392	404
5	8	P0C0L4|CO4A_HUMAN	K.VGGNSKGTLKVLR.T	N	59.36	1327.79	0	664.904	2	21.62	F18:2103	5	1370	1382
5	8	P0C0L4|CO4A_HUMAN	R.SFFPENWLWR.V	N	58.72	1380.66	-1.9	691.337	2	69.16	F18:8751	2	776	785
5	8	P0C0L4|CO4A_HUMAN	R.RGHLFLQTDQPIYNPGQR.V	N	56.71	2139.1	1.1	1070.56	2	40.61	F16:6044	3	138	155
5	8	P0C0L4|CO4A_HUMAN	K.LTSLSDRYVSHFETEGPHVLLYFDSVPTSR.E	N	56.45	3451.7	1.1	863.934	4	59.91	F17:9033	2	1504	1533
5	8	P0C0L4|CO4A_HUMAN	R.SMQGGLVGNDETVALTAFVTIALHHGLAVFQDEGAEPLK.Q	N	56.35	4035.04	-0.9	1009.77	4	89.21	F17:12883	4	1127	1165
5	8	P0C0L4|CO4A_HUMAN	R.GPEVQLVAHSPWLKDSLSR.T	N	56.02	2118.12	-1.2	707.047	3	49.88	F16:7831	4	105	123
5	8	P0C0L4|CO4A_HUMAN	R.QGSFQGGFR.S	N	55.2	982.462	-0.1	492.238	2	29.31	F19:2905	5	1292	1300
5	8	P0C0L4|CO4A_HUMAN	R.LLLFSPSVVHLGVPLSVGVQLQDVPRGQVVK.G	N	54.84	3279.91	0.5	1094.31	3	67.64	F16:10867	5	23	53
5	8	P0C0L4|CO4A_HUMAN	R.DSSTWLTAFVLK.V	Y	53.98	1366.71	-0.3	684.364	2	70.85	F18:8941	5	1073	1084
5	8	P0C0L4|CO4A_HUMAN	R.GRTLEIPGNSDPNMIPDGDFNSYVR.V	N	53.83	2763.29	0.3	922.105	3	52.44	F16:8305	4	955	979
5	8	P0C0L4|CO4A_HUMAN	R.QRAAC(+105.06)AQLNDFLQEYGTQGC(+105.06)QV	N	53.27	2652.22	0.1	885.081	3	50.76	F19:5484	6	1723	1744	S-pyridylethylation
5	8	P0C0L4|CO4A_HUMAN	R.C(+105.06)SVFYGAPSK.S	N	52.08	1162.55	-1.9	582.28	2	28.75	F17:3691	4	1566	1575	S-pyridylethylation
5	8	P0C0L4|CO4A_HUMAN	R.RC(+105.06)SVFYGAPSK.S	N	51.81	1318.65	0.1	440.557	3	24.45	F18:2535	5	1565	1575	S-pyridylethylation
5	8	P0C0L4|CO4A_HUMAN	R.GLQDEDGYRMK.F	N	51.51	1310.59	0.6	656.304	2	26.69	F19:2556	3	1605	1615
5	8	P0C0L4|CO4A_HUMAN	K.AEFQDALEKLNM(+15.99)GITDLQGLR.L	N	50.94	2377.19	1	793.406	3	69.62	F16:11168	1	317	337	Oxidation (M)
5	8	P0C0L4|CO4A_HUMAN	R.NVNFQKAINEKLGQYASPTAKR.C	N	50.23	2476.32	1.5	620.088	4	43.92	F19:4698	2	680	701
5	8	P0C0L4|CO4A_HUMAN	R.VEYGFQVK.V	N	49.96	968.497	-1.5	485.255	2	36.74	F17:5138	3	1623	1630
5	8	P0C0L4|CO4A_HUMAN	R.FGLLDEDGKK.T	N	49.94	1120.58	-0.3	561.295	2	35.65	F16:5052	4	284	293
5	8	P0C0L4|CO4A_HUMAN	R.EM(+15.99)SGSPASGIPVK.V	N	49.78	1274.62	-0.9	638.316	2	32.12	F17:4306	4	392	404	Oxidation (M)
5	8	P0C0L4|CO4A_HUMAN	R.LPMMR.S	N	48.52	646.33	1.7	324.173	2	29.47	F19:2926	6	710	714
5	8	P0C0L4|CO4A_HUMAN	R.HLVPGAPFLLQALVR.E	N	48.14	1629.97	-0.8	544.331	3	67.45	F16:10837	8	377	391
5	8	P0C0L4|CO4A_HUMAN	K.KYVLPNFEVK.I	N	47.51	1235.69	-0.7	618.852	2	44.27	F16:6762	4	235	244
5	8	P0C0L4|CO4A_HUMAN	K.AAANQMR.N	N	46.43	760.365	0.8	381.19	2	6.16	F17:546	2	1659	1665
5	8	P0C0L4|CO4A_HUMAN	R.VQQPDC(+105.06)REPFLSC(+105.06)C(+105.06)QFAESLR.K	N	46.41	2770.28	0.6	924.435	3	45.56	F17:6709	14	723	743	S-pyridylethylation
5	8	P0C0L4|CO4A_HUMAN	R.VTASDPLDTLGSEGALSPGGVASLLRLPR.G	N	46.23	2848.53	0.4	950.517	3	71.05	F17:10667	4	980	1008
5	8	P0C0L4|CO4A_HUMAN	K.SHKPLNMGK.V	N	45.74	1010.53	-1.2	506.273	2	8.26	F16:766	2	615	623
5	8	P0C0L4|CO4A_HUMAN	R.YLDKTEQWSTLPPETKDHAVDLIQKGYMR.I	N	45.73	3461.73	0.1	866.439	4	48.18	F16:7510	1	1027	1055
5	8	P0C0L4|CO4A_HUMAN	R.LRLEPGKEYLIMGLDGATYDLEGHPQYLLDSNSWIEEMPSER.L	N	45.47	4864.34	1.4	1217.09	4	69.47	F17:10447	3	1675	1716
5	8	P0C0L4|CO4A_HUMAN	K.ANSFLGEK.A	Y	45.22	864.434	-0.2	433.224	2	29.08	F17:3754	3	1175	1182
5	8	P0C0L4|CO4A_HUMAN	K.LELSVDGAK.Q	N	44.83	930.502	-0.5	466.258	2	35	F16:4917	2	571	579
5	8	P0C0L4|CO4A_HUMAN	K.YVLPNFEVK.I	N	44.34	1107.6	-0.6	554.805	2	50.34	F16:7915	4	236	244
5	8	P0C0L4|CO4A_HUMAN	R.VFALDQK.M	N	43.84	819.449	1.8	410.733	2	32.46	F16:4416	4	160	166
5	8	P0C0L4|CO4A_HUMAN	K.SC(+105.06)GLHQLLR.G	N	43.42	1130.6	-0.1	566.308	2	29.34	F16:3810	4	96	104	S-pyridylethylation
5	8	P0C0L4|CO4A_HUMAN	R.NGESVKLHLETDSLALVALGALDTALYAAGSK.S	N	43.29	3226.71	-3.3	807.682	4	87.36	F19:9179	3	583	614
5	8	P0C0L4|CO4A_HUMAN	R.YRVFALDQK.M	N	41.44	1138.61	0.2	380.545	3	37.05	F17:5194	10	158	166
5	8	P0C0L4|CO4A_HUMAN	R.FGLLDEDGKKTFFR.G	N	40.95	1671.86	-2.2	558.293	3	48.45	F16:7560	3	284	297
5	8	P0C0L4|CO4A_HUMAN	K.LTSLSDR.Y	N	40.13	790.418	0.7	396.217	2	20.31	F17:2224	2	1504	1510
5	8	P0C0L4|CO4A_HUMAN	K.VSATVSSPGSVPEVQDIQQNTDGSGQVSIPIIIPQTISELQLSVSAGSPHPAIAR.L	N	39.85	5561.89	-3.5	1391.47	4	75.75	F16:12056	2	405	459
5	8	P0C0L4|CO4A_HUMAN	R.DKGQAGLQR.A	N	38.61	971.515	-2	486.764	2	8.24	F16:764	4	748	756
5	8	P0C0L4|CO4A_HUMAN	K.VLSLAQEQVGGSPEKLQETSNWLLSQQQADGSFQDPC(+105.06)PVLDR.S	Y	38.53	4702.3	4.1	1176.59	4	60.26	F17:9087	4	1085	1126	S-pyridylethylation
5	8	P0C0L4|CO4A_HUMAN	R.LLATLC(+105.06)SAEVC(+105.06)QC(+105.06)AEGK.C	N	37.46	2052.98	-1.9	685.334	3	37.59	F17:5302	5	1578	1594	S-pyridylethylation
5	8	P0C0L4|CO4A_HUMAN	R.NPSDPMPQAPALWIETTAYALLHLLLHEGK.A	N	35.66	3325.72	1.2	832.438	4	99.02	F16:14915	1	1249	1278
5	8	P0C0L4|CO4A_HUMAN	R.LTVAAPPSGGPGFLSIERPDSRPPR.V	N	35.61	2573.37	1.3	858.799	3	47.37	F17:6996	8	460	484
5	8	P0C0L4|CO4A_HUMAN	K.SC(+105.06)GLHQLLRGPEVQLVAHSPWLKDSLSR.T	N	34.55	3230.71	-0.7	808.685	4	56.14	F16:8966	2	96	123	S-pyridylethylation
5	8	P0C0L4|CO4A_HUMAN	R.LPM(+15.99)MR.S	N	34.45	662.324	1.6	332.17	2	29.62	F19:2947	3	710	714	Oxidation (M)
5	8	P0C0L4|CO4A_HUMAN	K.VLQIEK.E	N	32.89	728.443	1.1	365.229	2	24.82	F16:2918	4	930	935
5	8	P0C0L4|CO4A_HUMAN	R.NFLVR.A	N	31.99	647.375	0.5	324.695	2	33.13	F17:4503	2	1666	1670
5	8	P0C0L4|CO4A_HUMAN	K.ADGSYAAWLSR.D	N	31.81	1195.56	-0.6	598.788	2	46.99	F16:7280	2	1062	1072
5	8	P0C0L4|CO4A_HUMAN	R.VEASISK.A	N	30.21	732.402	0.8	367.208	2	9.54	F17:965	2	1168	1174
5	8	P0C0L4|CO4A_HUMAN	K.GTLKVLR.T	N	28.99	785.512	-0.3	393.763	2	22.4	F18:2224	2	1376	1382
5	8	P0C0L4|CO4A_HUMAN	R.LSC(+105.06)PK.E	N	28.98	651.341	0.9	326.678	2	9.14	F16:902	1	667	671	S-pyridylethylation
5	8	P0C0L4|CO4A_HUMAN	R.RALER.G	N	28.01	643.376	0.4	322.696	2	4.92	F17:414	5	1600	1604
5	8	P0C0L4|CO4A_HUMAN	K.FAC(+105.06)YYPR.V	N	27.57	1023.46	0.6	512.739	2	30.25	F17:3971	4	1616	1622	S-pyridylethylation
5	8	P0C0L4|CO4A_HUMAN	R.LEPGKEYLIMGLDGATYDLEGHPQYLLDSNSWIEEMPSER.L	N	26.41	4595.15	4.5	1149.8	4	68	F17:10246	3	1677	1716
5	8	P0C0L4|CO4A_HUMAN	R.LPMM(+15.99)R.S	N	24.48	662.324	-0.2	332.169	2	19.45	F19:1654	3	710	714	Oxidation (M)
5	8	P0C0L4|CO4A_HUMAN	R.LPM(+15.99)M(+15.99)R.S	N	23.05	678.319	0.7	340.167	2	29.62	F17:3851	6	710	714	Oxidation (M)
5	8	P0C0L4|CO4A_HUMAN	R.IQQFR.K	N	22.61	690.381	1.2	346.198	2	14.76	F16:1457	4	1056	1060
5	8	P0C0L4|CO4A_HUMAN	R.SC(+105.06)EQR.A	N	22.17	726.312	0.4	364.163	2	5.37	F16:453	3	715	719	S-pyridylethylation
5	8	P0C0L4|CO4A_HUMAN	R.NVNFQK.A	N	20.7	748.387	1	375.201	2	17.66	F19:1456	3	680	685
6	15	P04114|APOB_HUMAN	K.TTLTAFGFASADLIEIGLEGK.G	Y	136.22	2153.13	-3.8	1077.57	2	110.99	F19:11304	2	675	695
6	15	P04114|APOB_HUMAN	K.LPQQANDYLNSFNWER.Q	Y	86.45	1993.93	0.5	997.972	2	56.97	F16:9113	2	2118	2133
6	15	P04114|APOB_HUMAN	R.AALGKLPQQANDYLNSFNWER.Q	Y	86.36	2434.2	3	1218.11	2	57.93	F16:9287	4	2113	2133
6	15	P04114|APOB_HUMAN	K.DKDQEVLLQTFLDDASPGDKR.L	Y	81.16	2389.18	0.8	797.4	3	61.42	F16:9885	4	538	558
6	15	P04114|APOB_HUMAN	R.KGNVATEISTER.D	Y	80.71	1303.67	0.6	652.844	2	23.15	F17:2718	8	196	207
6	15	P04114|APOB_HUMAN	K.TTLTAFGFASADLIEIGLEGKGFEPTLEALFGK.Q	Y	80.56	3442.79	1.5	1148.61	3	98.64	F18:11395	9	675	707
6	15	P04114|APOB_HUMAN	R.KYTYNYEAESSSGVPGTADSR.S	Y	78.12	2281.01	-0.1	1141.51	2	32.23	F16:4372	8	51	71
6	15	P04114|APOB_HUMAN	R.ATLYALSHAVNNYHK.T	Y	77.73	1700.86	-1.8	851.437	2	38.06	F16:5536	5	440	454
6	15	P04114|APOB_HUMAN	R.ITENDIQIALDDAK.I	Y	76.83	1557.79	0.8	779.902	2	52.62	F16:8336	2	2151	2164
6	15	P04114|APOB_HUMAN	K.KMTSNFPVDLSDYPK.S	Y	76.03	1740.84	-0.4	871.427	2	47.15	F16:7312	3	1188	1202
6	15	P04114|APOB_HUMAN	R.ILGEELGFASLHDLQLLGK.L	Y	73.2	2052.13	2	1027.07	2	67.47	F16:10840	5	779	797
6	15	P04114|APOB_HUMAN	K.LLSGGNTLHLVSTTK.T	Y	72.92	1539.86	-1	770.938	2	39.16	F16:5757	6	935	949
6	15	P04114|APOB_HUMAN	K.TILGTMPAFEVSLQALQK.A	Y	72.6	1946.05	0.9	974.035	2	69.03	F16:11082	2	2592	2609
6	15	P04114|APOB_HUMAN	K.TQFNNNEYSQDLDAYNTK.D	Y	72.44	2163.93	-1	1082.97	2	40.6	F16:6043	2	1985	2002
6	15	P04114|APOB_HUMAN	K.ALYWVNGQVPDGVSK.V	Y	72.24	1631.83	0.5	816.923	2	49.34	F16:7734	2	718	732
6	15	P04114|APOB_HUMAN	R.TSSFALNLPTLPEVKFPEVDVLTK.Y	Y	70.87	2644.44	-0.7	1323.22	2	70.45	F16:11292	4	3776	3799
6	15	P04114|APOB_HUMAN	K.MTSNFPVDLSDYPK.S	Y	70.8	1612.74	0.7	807.38	2	51.76	F16:8184	2	1189	1202
6	15	P04114|APOB_HUMAN	K.IAELSATAQEIIK.S	Y	70.49	1385.78	-0.9	693.895	2	48.52	F20:3980	9	4466	4478
6	15	P04114|APOB_HUMAN	K.TKNSEEFAAAM(+15.99)SR.Y	Y	70.16	1456.66	1.1	729.339	2	29.97	F16:3927	3	116	128	Oxidation (M)
6	15	P04114|APOB_HUMAN	R.ALVDTLKFVTQAEGAK.Q	Y	69.83	1689.93	0.4	845.973	2	55.92	F16:8928	5	1028	1043
6	15	P04114|APOB_HUMAN	K.NFVASHIANILNSEELDIQDLKK.L	Y	69.76	2610.37	0.1	871.129	3	62.75	F16:10099	2	591	613
6	15	P04114|APOB_HUMAN	R.TGISPLALIK.G	Y	69.54	1011.63	-0.6	506.823	2	55.36	F18:7072	7	220	229
6	15	P04114|APOB_HUMAN	K.SVSDGIAALDLNAVANK.I	Y	68.46	1656.87	-1.3	553.296	3	53.1	F16:8425	4	3830	3846
6	15	P04114|APOB_HUMAN	K.YTYNYEAESSSGVPGTADSR.S	Y	67.22	2152.92	0.5	1077.47	2	35.97	F16:5121	1	52	71
6	15	P04114|APOB_HUMAN	K.NSEEFAAAM(+15.99)SR.Y	Y	66.51	1227.52	-2	614.765	2	35.2	F17:4863	6	118	128	Oxidation (M)
6	15	P04114|APOB_HUMAN	R.LPYTIITTPPLKDFSLWEK.T	Y	66.44	2261.23	1.6	1131.63	2	67.38	F16:10824	4	3137	3155
6	15	P04114|APOB_HUMAN	K.QVFLYPEKDEPTYILNIK.R	Y	66.31	2209.17	1	1105.59	2	56.51	F16:9029	6	140	157
6	15	P04114|APOB_HUMAN	K.GFEPTLEALFGK.Q	Y	66.3	1307.68	0.6	654.846	2	66.57	F16:10695	2	696	707
6	15	P04114|APOB_HUMAN	K.ALVEQGFTVPEIK.T	Y	66.09	1429.78	-0.4	715.898	2	51.66	F16:8166	2	2579	2591
6	15	P04114|APOB_HUMAN	K.ATFQTPDFIVPLTDLR.I	Y	66.06	1832.97	-0.3	917.491	2	67.97	F16:10918	3	2610	2625
6	15	P04114|APOB_HUMAN	R.VIGNMGQTMEQLTPELK.S	Y	65.49	1887.94	1	944.98	2	54.56	F16:8686	6	491	507
6	15	P04114|APOB_HUMAN	K.TNPTGTQELLDIANYLMEQIQDDC(+105.06)TGDEDYTYLILR.V	Y	63.27	4268.98	0.3	1424	3	93.27	F16:14232	4	455	490	S-pyridylethylation
6	15	P04114|APOB_HUMAN	K.NSEEFAAAMSR.Y	Y	62.39	1211.52	-0.1	606.769	2	35.21	F17:4865	2	118	128
6	15	P04114|APOB_HUMAN	K.LTISEQNIQR.A	Y	61.99	1200.65	-0.6	601.33	2	33.31	F17:4537	4	335	344
6	15	P04114|APOB_HUMAN	K.NLTDFAEQYSIQDWAK.R	Y	61.75	1927.9	1	964.956	2	61.11	F16:9833	2	2560	2575
6	15	P04114|APOB_HUMAN	K.MGLAFESTK.S	Y	61.4	982.479	-1.4	492.246	2	38.92	F17:5542	4	306	314
6	15	P04114|APOB_HUMAN	K.GNVATEISTER.D	Y	61.08	1175.58	-1	588.796	2	28.6	F16:3661	4	197	207
6	15	P04114|APOB_HUMAN	R.NLQNNAEWVYQGAIR.Q	Y	61.07	1774.88	-0.1	888.445	2	49.59	F16:7778	7	4107	4121
6	15	P04114|APOB_HUMAN	R.SEYQADYESLR.F	Y	61.03	1359.59	-0.9	680.804	2	34.68	F16:4849	4	1600	1610
6	15	P04114|APOB_HUMAN	K.QVFLYPEKDEPTYILNIKR.G	Y	60.94	2365.27	0.7	789.431	3	51.29	F16:8094	7	140	158
6	15	P04114|APOB_HUMAN	K.VSALLTPAEQTGTWK.L	Y	60.66	1600.85	0	801.43	2	45.8	F16:7060	2	1968	1982
6	15	P04114|APOB_HUMAN	K.LLSGGNTLHLVSTTKTEVIPPLIENR.Q	Y	60.22	2801.56	0.4	934.863	3	53.64	F16:8521	2	935	960
6	15	P04114|APOB_HUMAN	K.ATGVLYDYVNK.Y	Y	59.92	1241.63	0.6	621.822	2	41.99	F16:6319	2	4077	4087
6	15	P04114|APOB_HUMAN	K.FPEVDVLTK.Y	Y	59.15	1046.56	-0.8	524.289	2	47.15	F16:7310	2	3791	3799
6	15	P04114|APOB_HUMAN	K.ATGVLYDYVNKYHWEHTGLTLR.E	Y	59	2635.32	-1.5	879.445	3	53.14	F16:8432	4	4077	4098
6	15	P04114|APOB_HUMAN	K.SVSLPSLDPASAK.I	Y	58.74	1270.68	-0.2	636.346	2	44.64	F16:6837	2	642	654
6	15	P04114|APOB_HUMAN	R.TSSFALNLPTLPEVK.F	Y	58.71	1615.88	0.4	808.949	2	61.22	F16:9852	2	3776	3790
6	15	P04114|APOB_HUMAN	R.TLQGIPQM(+15.99)IGEVIR.K	Y	57.92	1569.85	0.5	785.935	2	54.78	F16:8726	2	805	818	Oxidation (M)
6	15	P04114|APOB_HUMAN	K.KLTISEQNIQR.A	Y	57.89	1328.74	-0.2	665.378	2	28.33	F16:3602	4	334	344
6	15	P04114|APOB_HUMAN	R.VRESDEETQIKVNWEEEAASGLLTSLKDNVPK.A	Y	57.55	3613.81	0.5	904.461	4	63.7	F16:10254	2	4045	4076
6	15	P04114|APOB_HUMAN	R.KMEPKDKDQEVLLQTFLDDASPGDKR.L	Y	56.39	3002.5	-0.3	751.633	4	53.04	F16:8413	2	533	558
6	15	P04114|APOB_HUMAN	R.LNTDIAGLASAIDM(+15.99)STNYNSDSLHFSNVFR.S	Y	56.25	3288.54	0.3	1097.19	3	67.2	F16:10795	4	1868	1897	Oxidation (M)
6	15	P04114|APOB_HUMAN	R.SPSQADINKIVQILPWEQNEQVK.N	Y	56.15	2663.39	1.9	888.806	3	62.55	F16:10066	2	568	590
6	15	P04114|APOB_HUMAN	K.STSPPKQAEAVLK.T	Y	55.9	1354.75	-0.4	678.38	2	27.42	F17:3458	6	315	327
6	15	P04114|APOB_HUMAN	K.IEGNLIFDPNNYLPKESMLK.T	Y	55.86	2334.19	0.1	779.072	3	62.12	F16:9998	1	655	674
6	15	P04114|APOB_HUMAN	R.NLKHINIDQFVR.K	Y	55.82	1495.83	-0.6	499.616	3	42.35	F16:6386	2	2098	2109
6	15	P04114|APOB_HUMAN	K.SPAFTDLHLR.Y	Y	55.69	1155.6	-1	386.208	3	41.66	F16:6252	4	3980	3989
6	15	P04114|APOB_HUMAN	R.IPSVQINFK.D	Y	54.88	1044.6	-1.3	523.305	2	46.41	F16:7171	2	2626	2634
6	15	P04114|APOB_HUMAN	K.NKADYVETVLDSTC(+105.06)SSTVQFLEYELNVLGTHKIEDGTLASK.T	Y	54.78	4622.27	-0.3	1156.58	4	81.17	F16:12772	2	3904	3944	S-pyridylethylation
6	15	P04114|APOB_HUMAN	R.NNALDFVTK.S	Y	54.75	1020.52	-0.9	511.269	2	41.43	F16:6207	2	3213	3221
6	15	P04114|APOB_HUMAN	K.EVYGFNPEGK.A	Y	54.72	1138.53	-0.2	570.272	2	36.54	F17:5104	2	101	110
6	15	P04114|APOB_HUMAN	K.MEPKDKDQEVLLQTFLDDASPGDKR.L	Y	54.42	2874.41	-0.6	959.142	3	56.73	F16:9071	4	534	558
6	15	P04114|APOB_HUMAN	K.NKADYVETVLDSTC(+105.06)SSTVQFLEYELNVLGTHK.I	Y	54.02	3707.8	1.5	927.959	4	83.04	F16:13012	2	3904	3935	S-pyridylethylation
6	15	P04114|APOB_HUMAN	K.SVSDGIAALDLNAVANKIADFELPTIIVPEQTIEIPSIK.F	Y	53.87	4104.22	2.6	1369.09	3	83.26	F16:13037	5	3830	3868
6	15	P04114|APOB_HUMAN	K.SFDYHQFVDETNDKIR.E	Y	53.73	2012.92	-0.9	671.981	3	46.65	F16:7216	1	2429	2444
6	15	P04114|APOB_HUMAN	R.LAAYLMLMR.S	Y	53.5	1080.58	-1.4	541.298	2	58.11	F16:9320	3	559	567
6	15	P04114|APOB_HUMAN	K.LIVAMSSWLQK.A	Y	53.22	1274.71	2.4	638.362	2	58.05	F16:9309	2	1230	1240
6	15	P04114|APOB_HUMAN	K.SLHMYANR.L	Y	53.07	990.471	-0.5	496.242	2	19.96	F16:2090	5	1203	1210
6	15	P04114|APOB_HUMAN	R.EFQVPTFTIPK.L	Y	52.93	1305.7	0.2	653.856	2	57.76	F16:9256	2	1334	1344
6	15	P04114|APOB_HUMAN	R.VIGNM(+15.99)GQTMEQLTPELK.S	Y	51.56	1903.94	-0.2	952.976	2	54.69	F16:8711	1	491	507	Oxidation (M)
6	15	P04114|APOB_HUMAN	R.TIDQMLNSELQWPVPDIYLR.D	Y	50.72	2430.23	1.1	811.083	3	73.99	F16:11816	3	2675	2694
6	15	P04114|APOB_HUMAN	K.C(+105.06)VQSTKPSLMIQK.A	Y	50.51	1566.83	2.3	784.422	2	25.58	F16:3059	2	513	525	S-pyridylethylation
6	15	P04114|APOB_HUMAN	K.DKIGVELTGR.T	Y	50.08	1086.6	-1.4	544.308	2	32.09	F16:4345	4	2003	2012
6	15	P04114|APOB_HUMAN	K.VQGVEFSHR.L	Y	50.02	1057.53	-1.8	529.772	2	22.76	F16:2539	4	1859	1867
6	15	P04114|APOB_HUMAN	K.M(+15.99)GLAFESTK.S	Y	49.8	998.474	-2	500.243	2	38.86	F17:5531	4	306	314	Oxidation (M)
6	15	P04114|APOB_HUMAN	R.LTLDIQNK.K	Y	49.58	943.534	-0.9	472.774	2	36.65	F16:5256	2	1092	1099
6	15	P04114|APOB_HUMAN	K.IGVELTGR.T	Y	49.5	843.481	0.2	422.748	2	33.37	F16:4596	1	2005	2012
6	15	P04114|APOB_HUMAN	K.SVGFHLPSREFQVPTFTIPK.L	Y	49.13	2286.22	0.1	763.079	3	58.17	F16:9333	4	1325	1344
6	15	P04114|APOB_HUMAN	K.HINIDQFVR.K	Y	48.99	1140.6	-0.5	571.309	2	42.11	F16:6343	2	2101	2109
6	15	P04114|APOB_HUMAN	R.LELELRPTGEIEQYSVSATYELQR.E	Y	48.95	2823.43	1.4	942.152	3	57.88	F16:9278	2	1001	1024
6	15	P04114|APOB_HUMAN	K.SVGFHLPSR.E	Y	48.74	998.53	-1.1	500.272	2	36.21	F16:5166	4	1325	1333
6	15	P04114|APOB_HUMAN	R.DLKVEDIPLAR.I	Y	48.52	1267.71	-0.8	634.864	2	45.5	F16:7003	5	2695	2705
6	15	P04114|APOB_HUMAN	K.VNWEEEAASGLLTSLKDNVPK.A	Y	47.82	2299.17	1.5	767.398	3	67.75	F16:10886	2	4056	4076
6	15	P04114|APOB_HUMAN	K.IADFELPTIIVPEQTIEIPSIK.F	Y	47.77	2465.37	1.3	822.797	3	73.09	F16:11692	2	3847	3868
6	15	P04114|APOB_HUMAN	K.C(+105.06)VQSTKPSLM(+15.99)IQK.A	Y	47.73	1582.82	1.1	792.419	2	25.59	F16:3062	3	513	525	S-pyridylethylation; Oxidation (M)
6	15	P04114|APOB_HUMAN	K.QGFFPDSVNK.A	Y	47.29	1137.55	0	569.78	2	41.5	F16:6222	2	708	717
6	15	P04114|APOB_HUMAN	K.STSPPKQAEAVLKTLQELK.K	Y	47.12	2067.16	0.9	690.06	3	56.93	F16:9106	1	315	333
6	15	P04114|APOB_HUMAN	R.FFGEGTKK.M	Y	46.95	912.471	-1.1	457.242	2	21.73	F17:2466	3	298	305
6	15	P04114|APOB_HUMAN	K.GNVATEISTERDLGQC(+105.06)DR.F	Y	46.82	2067.96	-1.7	690.328	3	33.38	F16:4599	6	197	214	S-pyridylethylation
6	15	P04114|APOB_HUMAN	K.VLADKFIIPGLK.L	Y	46.67	1312.81	1	657.414	2	53.22	F16:8445	2	3725	3736
6	15	P04114|APOB_HUMAN	K.TEVIPPLIENR.Q	Y	46.67	1279.71	-0.4	640.864	2	47.51	F16:7381	2	950	960
6	15	P04114|APOB_HUMAN	K.TQFNNNEYSQDLDAYNTKDKIGVELTGR.T	Y	46.66	3232.53	1	809.14	4	47.23	F16:7327	2	1985	2012
6	15	P04114|APOB_HUMAN	K.GM(+15.99)ALFGEGK.A	Y	45.41	924.438	-0.4	463.226	2	41.7	F16:6260	2	3006	3014	Oxidation (M)
6	15	P04114|APOB_HUMAN	R.VNDESTEGK.T	Y	43.56	977.43	-1.2	489.722	2	5.96	F16:523	2	1079	1087
6	15	P04114|APOB_HUMAN	K.TGLKEFLK.T	Y	43.28	934.549	-0.8	468.281	2	36.63	F16:5252	4	3156	3163
6	15	P04114|APOB_HUMAN	K.IEIPLPFGGK.S	Y	42.29	1069.62	-0.1	535.816	2	58.44	F16:9380	2	1296	1305
6	15	P04114|APOB_HUMAN	R.TLADLTLLDSPIKVPLLLSEPINIIDALEMR.D	Y	42.2	3415.93	3.1	1139.65	3	94.64	F16:14385	4	2013	2043
6	15	P04114|APOB_HUMAN	K.LAPGELTIIL	Y	42.12	1038.63	-0.8	520.323	2	69.52	F16:11155	2	4554	4563
6	15	P04114|APOB_HUMAN	K.SQAIATKK.I	Y	41.72	845.497	-0.2	423.756	2	4.34	F16:353	2	4479	4486
6	15	P04114|APOB_HUMAN	K.LAIPEGK.Q	Y	41.36	726.428	-0.5	364.221	2	28.48	F17:3643	8	133	139
6	15	P04114|APOB_HUMAN	R.KGNVATEISTERDLGQC(+105.06)DR.F	Y	41.34	2196.06	-0.1	733.027	3	29.41	F16:3823	8	196	214	S-pyridylethylation
6	15	P04114|APOB_HUMAN	K.IDDIWNLEVK.E	Y	41.06	1243.64	1.1	622.83	2	55.77	F16:8902	1	3538	3547
6	15	P04114|APOB_HUMAN	K.LDFREIQIYK.K	Y	40.82	1323.72	-0.1	442.247	3	49.79	F16:7816	2	3763	3772
6	15	P04114|APOB_HUMAN	R.NIQEYLSILTDPDGKGKEK.I	Y	40.53	2147.11	0	537.785	4	57.83	F16:9269	2	4447	4465
6	15	P04114|APOB_HUMAN	K.NSLKIEIPLPFGGK.S	Y	40.3	1511.87	-2.5	504.963	3	58.79	F16:9442	2	1292	1305
6	15	P04114|APOB_HUMAN	R.SRATLYALSHAVNNYHK.T	Y	40.2	1944	-0.8	487.006	4	36.41	F16:5206	1	438	454
6	15	P04114|APOB_HUMAN	R.QIDDIDVR.F	Y	40.11	972.488	-3.2	487.25	2	31.39	F16:4198	2	4122	4129
6	15	P04114|APOB_HUMAN	K.IKGVISIPR.L	Y	40.1	981.634	-1.1	491.824	2	35.03	F16:4923	3	1120	1128
6	15	P04114|APOB_HUMAN	R.VIGNMGQTMEQLTPELKSSILK.C	Y	39.76	2416.27	-0.1	806.431	3	59.07	F16:9489	2	491	512
6	15	P04114|APOB_HUMAN	K.LKFIIPSPK.R	Y	38.53	1041.66	-0.4	521.836	2	44.79	F16:6867	3	922	930
6	15	P04114|APOB_HUMAN	R.LLDHRVPQTDM(+15.99)TFR.H	Y	37.84	1743.87	-3.1	582.296	3	36.72	F16:5269	1	1211	1224	Oxidation (M)
6	15	P04114|APOB_HUMAN	R.INC(+105.06)KVELEVPQLC(+105.06)SFILK.T	Y	36.81	2285.23	2.4	572.317	4	57.64	F16:9233	2	76	93	S-pyridylethylation
6	15	P04114|APOB_HUMAN	R.VPSYTLILPSLELPVLHVPR.N	Y	36.8	2242.31	4.5	1122.17	2	73.05	F16:11686	4	3292	3311
6	15	P04114|APOB_HUMAN	R.TPALHFK.S	Y	36.39	812.455	1.4	271.826	3	27.08	F16:3354	4	1318	1324
6	15	P04114|APOB_HUMAN	R.NYQLYK.S	Y	36.23	827.418	0.9	414.716	2	27.65	F16:3468	2	636	641
6	15	P04114|APOB_HUMAN	K.TILGTM(+15.99)PAFEVSLQALQK.A	Y	33.75	1962.05	0.8	982.033	2	62.06	F16:9988	6	2592	2609	Oxidation (M)
6	15	P04114|APOB_HUMAN	K.AAIQALR.K	Y	33.74	741.45	0.5	371.732	2	25.27	F16:3006	4	526	532
6	15	P04114|APOB_HUMAN	K.VELEVPQLC(+105.06)SFILK.T	Y	32.53	1721.94	0.1	574.988	3	63.33	F16:10197	2	80	93	S-pyridylethylation
6	15	P04114|APOB_HUMAN	R.ANLFNK.L	Y	32.21	705.381	1.2	353.698	2	26.51	F16:3238	1	345	350
6	15	P04114|APOB_HUMAN	K.FRETLEDTR.D	Y	32.09	1165.57	0.6	583.794	2	24.3	F16:2816	2	2512	2520
6	15	P04114|APOB_HUMAN	K.KIISDYHQQFR.Y	Y	31.53	1433.74	-1.8	478.92	3	26.7	F16:3276	2	4486	4496
6	15	P04114|APOB_HUMAN	R.TFQIPGYTVPVVNVEVSPFTIEM(+15.99)SAFGYVFPK.A	Y	31.4	3578.8	0.6	1193.94	3	83.07	F16:13016	1	3245	3276	Oxidation (M)
6	15	P04114|APOB_HUMAN	K.NIKIPSR.F	Y	31.4	826.502	0.8	414.259	2	23.21	F16:2620	4	2638	2644
6	15	P04114|APOB_HUMAN	R.FKHLR.K	Y	31.18	699.418	0.6	350.716	2	9	F19:742	3	46	50
6	15	P04114|APOB_HUMAN	K.AVSMPSFSILGSDVR.V	Y	30.48	1564.79	-0.5	522.604	3	59.95	F16:9639	2	3277	3291
6	15	P04114|APOB_HUMAN	K.FRETLEDTRDR.M	Y	29.6	1436.7	-1.8	719.356	2	19.33	F16:1998	9	2512	2522
6	15	P04114|APOB_HUMAN	K.KMGLAFESTK.S	Y	29.29	1110.57	-3.3	556.293	2	32.37	F17:4355	1	305	314
6	15	P04114|APOB_HUMAN	R.FFGEGTK.K	Y	28.96	784.375	0.5	393.195	2	28.43	F16:3622	2	298	304
6	15	P04114|APOB_HUMAN	K.IEGNLIFDPNNYLPK.E	Y	28.15	1745.9	3.1	873.959	2	62.73	F16:10096	3	655	669
6	15	P04114|APOB_HUMAN	K.LVTELR.G	Y	27.34	729.438	0.8	365.727	2	26.63	F16:3261	1	351	356
6	15	P04114|APOB_HUMAN	K.VIGTLK.N	Y	27.19	629.411	0.7	315.713	2	20.95	F16:2246	2	3029	3034
6	15	P04114|APOB_HUMAN	R.DLKM(+15.99)LETVR.T	Y	27.06	1119.6	-2.4	560.804	2	34.39	F16:4792	2	1309	1317	Oxidation (M)
6	15	P04114|APOB_HUMAN	K.YSQPEDSLIPFFEITVPESQLTVSQFTLPK.S	Y	25.45	3439.74	2.9	1147.59	3	81.62	F17:11998	4	3800	3829
6	15	P04114|APOB_HUMAN	K.KLTIFKTELR.V	Y	25.34	1247.76	0.1	416.927	3	36.99	F16:5326	1	4035	4044
6	15	P04114|APOB_HUMAN	K.NTASLK.Y	Y	24.15	632.349	1.2	317.182	2	18.15	F16:1839	1	1557	1562
6	15	P04114|APOB_HUMAN	R.LELELRPTGEIEQYSVSATYELQREDR.A	Y	23.84	3223.6	0.5	806.908	4	56.66	F16:9057	2	1001	1027
6	15	P04114|APOB_HUMAN	R.FREHNAK.F	Y	22.71	900.457	0.9	451.236	2	7.35	F16:647	1	1690	1696
6	15	P04114|APOB_HUMAN	K.AQIPILR.M	Y	22.52	809.512	1.2	405.764	2	40.25	F16:5976	2	3431	3437
6	15	P04114|APOB_HUMAN	K.GVISIPR.L	Y	21.99	740.455	0.1	371.235	2	36.51	F16:5226	2	1122	1128
6	15	P04114|APOB_HUMAN	K.QNALLR.S	Y	21.88	713.418	2	357.717	2	22.19	F16:2442	1	1594	1599
6	15	P04114|APOB_HUMAN	K.ATFQTPDFIVPLTDLRIPSVQINFKDLK.N	Y	21.18	3215.76	1.2	804.948	4	74.77	F16:11916	1	2610	2637
19	5	P04264|K2C1_HUMAN	R.GGGGGGYGSGGSSYGSGGGSYGSGGGGGGGR.G	Y	144.32	2382.94	-1	1192.48	2	23.86	F19:2191	6	519	549
19	5	P04264|K2C1_HUMAN	R.SLDLDSIIAEVKAQYEDIAQK.S	Y	123.49	2348.21	1.7	1175.11	2	79.47	F19:8533	8	344	364
19	5	P04264|K2C1_HUMAN	K.SKAEAESLYQSK.Y	Y	106.03	1339.66	0	670.838	2	21.61	F19:1912	2	365	376
19	5	P04264|K2C1_HUMAN	K.SKAEAESLYQSKYEELQITAGR.H	Y	103.73	2500.24	2.5	834.424	3	42.48	F19:4533	4	365	386
19	5	P04264|K2C1_HUMAN	R.FLEQQNQVLQTK.W	N	101.88	1474.78	-1	738.395	2	35.64	F19:3708	5	200	211
19	5	P04264|K2C1_HUMAN	R.SGGGFSSGSAGIINYQR.R	Y	100.72	1656.79	0.2	829.4	2	40.46	F20:3319	2	13	29
19	5	P04264|K2C1_HUMAN	K.WELLQQVDTSTR.T	Y	99.56	1474.74	-1	738.377	2	51.72	F19:5604	2	212	223
19	5	P04264|K2C1_HUMAN	R.SLDLDSIIAEVK.A	Y	94.09	1301.71	-1.1	651.861	2	65.43	F20:5578	9	344	355
19	5	P04264|K2C1_HUMAN	K.YEELQITAGR.H	N	90.18	1178.59	-0.2	590.304	2	37.23	F20:3065	5	377	386
19	5	P04264|K2C1_HUMAN	K.SLNNQFASFIDKVR.F	Y	87.48	1637.85	0.6	819.934	2	56.64	F19:6200	10	186	199
19	5	P04264|K2C1_HUMAN	K.AEAESLYQSK.Y	Y	86.8	1124.53	1	563.275	2	24.47	F19:2268	2	367	376
19	5	P04264|K2C1_HUMAN	K.SLNNQFASFIDK.V	Y	84.37	1382.68	0.2	692.349	2	52.76	F19:5728	2	186	197
19	5	P04264|K2C1_HUMAN	R.TLLEGEESR.M	Y	77.13	1032.51	-1.3	517.261	2	26.92	F19:2588	4	484	492
19	5	P04264|K2C1_HUMAN	R.TNAENEFVTIK.K	Y	75.31	1264.63	2.5	633.324	2	38.75	F20:3180	4	278	288
19	5	P04264|K2C1_HUMAN	R.TNAENEFVTIKK.D	Y	74.36	1392.72	1.8	697.371	2	31.67	F19:3212	8	278	289
19	5	P04264|K2C1_HUMAN	R.GSGGGSSGGSIGGR.G	Y	71.94	1091.5	0	546.755	2	9.41	F20:760	5	603	616
19	5	P04264|K2C1_HUMAN	K.AQYEDIAQKSK.A	Y	67.09	1279.64	0.4	640.828	2	20.63	F19:1797	2	356	366
19	5	P04264|K2C1_HUMAN	K.AEAESLYQSKYEELQITAGR.H	Y	62.41	2285.12	-2.2	762.711	3	45.34	F19:4857	2	367	386
19	5	P04264|K2C1_HUMAN	K.AQYEDIAQK.S	Y	60.47	1064.51	-0.7	533.264	2	23.36	F18:2362	5	356	364
19	5	P04264|K2C1_HUMAN	K.NM(+15.99)QDM(+15.99)VEDYR.N	Y	54.24	1331.51	-0.7	666.763	2	40.79	F19:4340	1	258	267	Oxidation (M)
19	5	P04264|K2C1_HUMAN	K.IEISELNR.V	N	53.63	972.524	-1.8	487.268	2	36.29	F19:3795	2	396	403
19	5	P04264|K2C1_HUMAN	K.NKLNDLEDALQQAKEDLAR.L	Y	53.02	2183.12	1.8	728.715	3	61.4	F16:9881	2	442	460
19	5	P04264|K2C1_HUMAN	K.SISISVAR.G	Y	48.36	831.481	2.2	416.749	2	33.43	F19:3449	9	75	82
19	5	P04264|K2C1_HUMAN	R.NKYEDEINKR.T	N	37.47	1307.65	-2.2	654.829	2	20.27	F19:1754	4	268	277
19	5	P04264|K2C1_HUMAN	R.RRVDQLKSDQSR.L	Y	35.32	1486.8	-0.9	496.606	3	8.91	F19:730	1	240	251
19	5	P04264|K2C1_HUMAN	R.GSGGGSSGGSIGGRGSSSGGVK.S	Y	32.62	1750.82	0.6	584.614	3	9.38	F20:757	3	603	624
19	5	P04264|K2C1_HUMAN	K.KDVDGAYMTK.V	Y	32.45	1126.53	-0.1	564.274	2	18.27	F19:1520	2	289	298
19	5	P04264|K2C1_HUMAN	K.SDQSRLDSELK.N	Y	31.48	1276.63	-1	639.32	2	25.55	F19:2404	2	247	257
19	5	P04264|K2C1_HUMAN	K.DVDGAYM(+15.99)TK.V	Y	30.13	1014.43	-0.6	508.223	2	25.93	F20:2098	1	290	298	Oxidation (M)
19	5	P04264|K2C1_HUMAN	R.RSGGGGGRFSSCGGGGGSFGAGGGFGSRSLVNLGGSK.S	Y	23.77	3247.53	1.9	1083.52	3	52	F18:6616	7	38	74
19	5	P04264|K2C1_HUMAN	R.SLVNLGGSK.S	Y	19.76	873.492	1.5	437.754	2	35.45	F19:3684	2	66	74
3	16	P00738|HPT_HUMAN	K.LRTEGDGVYTLNNEK.Q	Y	111.72	1707.84	-0.6	854.928	2	30.29	F20:2475	15	117	131
3	16	P00738|HPT_HUMAN	K.SPVGVQPILNEHTFC(+105.06)AGMSK.Y	Y	101.17	2219.09	1	1110.55	2	44.58	F17:6553	14	326	345	S-pyridylethylation
3	16	P00738|HPT_HUMAN	K.LRTEGDGVYTLNDK.K	N	101.02	1579.78	0.9	790.9	2	30.85	F19:3108	11	58	71
3	16	P00738|HPT_HUMAN	R.HYEGSTVPEKKTPK.S	Y	99.6	1599.83	-0.1	800.92	2	9.03	F19:747	8	312	325
3	16	P00738|HPT_HUMAN	K.AVGDKLPEC(+105.06)EAVC(+105.06)GKPK.N	N	97.86	1952.99	0.4	977.5	2	25.47	F18:2688	27	137	153	S-pyridylethylation
3	16	P00738|HPT_HUMAN	R.TEGDGVYTLNDK.K	N	97.14	1310.6	0.5	656.307	2	30.42	F18:3464	4	60	71
3	16	P00738|HPT_HUMAN	K.LRTEGDGVYTLNNEKQWINK.A	Y	95.79	2377.2	-2.4	793.406	3	39.89	F19:4227	13	117	136
3	16	P00738|HPT_HUMAN	R.TEGDGVYTLNNEK.Q	Y	95.16	1438.66	0.7	720.337	2	30.04	F19:3003	6	119	131
3	16	P00738|HPT_HUMAN	K.YVM(+15.99)LPVADQDQC(+105.06)IR.H	Y	94.93	1770.84	-3.1	886.426	2	43.29	F19:4620	22	298	311	Oxidation (M); S-pyridylethylation
3	16	P00738|HPT_HUMAN	K.LRTEGDGVYTLNDKK.Q	N	94.4	1707.88	0.8	570.301	3	28.8	F19:2835	25	58	72
3	16	P00738|HPT_HUMAN	K.YVMLPVADQDQC(+105.06)IR.H	Y	90.26	1754.85	0.6	878.432	2	43.35	F19:4628	21	298	311	S-pyridylethylation
3	16	P00738|HPT_HUMAN	K.SC(+105.06)AVAEYGVYVK.V	N	89.8	1392.67	2.1	697.346	2	37.65	F19:3958	100	380	391	S-pyridylethylation
3	16	P00738|HPT_HUMAN	R.TEGDGVYTLNNEKQWINK.A	Y	87.1	2108.02	-0.5	1055.02	2	41.71	F19:4442	8	119	136
3	16	P00738|HPT_HUMAN	K.YQEDTC(+105.06)YGDAGSAFAVHDLEEDTWYATGILSFDK.S	Y	86	3921.7	1.1	1308.24	3	70.59	F20:5987	56	346	379	S-pyridylethylation
3	16	P00738|HPT_HUMAN	R.TEGDGVYTLNDKK.Q	N	85.68	1438.69	0	720.354	2	24.71	F18:2573	12	60	72
3	16	P00738|HPT_HUMAN	K.SPVGVQPILNEHTFC(+105.06)AGM(+15.99)SK.Y	Y	85.49	2235.08	0.4	1118.55	2	41.11	F17:5931	23	326	345	S-pyridylethylation; Oxidation (M)
3	16	P00738|HPT_HUMAN	K.NYYKLRTEGDGVYTLNNEKQWINK.A	Y	84.44	2945.47	-1.1	982.829	3	42.17	F18:5249	9	113	136
3	16	P00738|HPT_HUMAN	K.AVGDKLPEC(+105.06)EADDGC(+105.06)PKPPEIAHGYVEHSVR.Y	Y	82.79	3527.66	-0.4	1176.89	3	34.17	F18:4047	8	78	108	S-pyridylethylation
3	16	P00738|HPT_HUMAN	K.VVLHPNYSQVDIGLIK.L	Y	81.84	1794	-0.1	898.009	2	49.13	F17:7298	4	236	251
3	16	P00738|HPT_HUMAN	K.LRTEGDGVYTLNDKKQWINK.A	N	78.37	2377.24	0.4	793.421	3	34.18	F18:4048	21	58	77
3	16	P00738|HPT_HUMAN	K.FTDHLKYVMLPVADQDQC(+105.06)IR.H	Y	78.18	2496.23	0.2	833.084	3	46.38	F17:6841	2	292	311	S-pyridylethylation
3	16	P00738|HPT_HUMAN	R.TEGDGVYTLNDKKQWINK.A	N	77.41	2108.05	0.5	1055.03	2	35.3	F18:4215	7	60	77
3	16	P00738|HPT_HUMAN	K.DIAPTLTLYVGK.K	N	76.28	1289.72	-0.1	645.869	2	54.38	F17:8137	2	216	227
3	16	P00738|HPT_HUMAN	R.VMPIC(+105.06)LPSKDYAEVGR.V	Y	74.55	1881.95	-0.7	941.981	2	41.13	F17:5935	11	262	277	S-pyridylethylation
3	16	P00738|HPT_HUMAN	R.HYEGSTVPEKK.T	Y	73.85	1273.63	0.1	637.822	2	7.57	F19:615	37	312	322
3	16	P00738|HPT_HUMAN	R.VGYVSGWGR.N	Y	73.25	979.487	-1.1	490.75	2	37.16	F18:4497	33	278	286
3	16	P00738|HPT_HUMAN	K.DIAPTLTLYVGKK.Q	N	73.04	1417.82	-0.1	709.916	2	47.74	F17:7056	12	216	228
3	16	P00738|HPT_HUMAN	K.LPEC(+105.06)EADDGC(+105.06)PKPPEIAHGYVEHSVR.Y	Y	72.47	3057.41	-2.8	1020.14	3	34.03	F18:4026	3	83	108	S-pyridylethylation
3	16	P00738|HPT_HUMAN	R.VM(+15.99)PIC(+105.06)LPSKDYAEVGR.V	Y	71.92	1897.94	-0.8	949.978	2	37.49	F17:5283	21	262	277	Oxidation (M); S-pyridylethylation
3	16	P00738|HPT_HUMAN	K.NYYKLRTEGDGVYTLNNEK.Q	Y	68.13	2276.11	-0.1	759.71	3	35.81	F18:4293	3	113	131
3	16	P00738|HPT_HUMAN	K.FTDHLKYVM(+15.99)LPVADQDQC(+105.06)IR.H	Y	67.89	2512.22	-0.6	838.415	3	46.35	F17:6836	4	292	311	Oxidation (M); S-pyridylethylation
3	16	P00738|HPT_HUMAN	R.ILGGHLDAKGSFPWQAK.M	N	62.96	1823.97	-1.1	608.996	3	45.83	F17:6753	4	162	178
3	16	P00738|HPT_HUMAN	R.NANFKFTDHLK.Y	Y	62.74	1333.68	-1.4	667.845	2	33.4	F17:4555	7	287	297
3	16	P00738|HPT_HUMAN	K.VTSIQDWVQK.T	Y	60.61	1202.63	0.6	602.322	2	43.6	F19:4661	5	392	401
3	16	P00738|HPT_HUMAN	K.TPKSPVGVQPILNEHTFC(+105.06)AGM(+15.99)SK.Y	Y	59.97	2561.28	0	854.766	3	42.41	F17:6164	4	323	345	S-pyridylethylation; Oxidation (M)
3	16	P00738|HPT_HUMAN	K.VTSIQDWVQKTIAEN	Y	58.82	1730.88	1.3	866.45	2	62.62	F17:9445	5	392	406
3	16	P00738|HPT_HUMAN	R.HYEGSTVPEK.K	Y	57.86	1145.54	-1.4	573.774	2	9.39	F17:934	4	312	321
3	16	P00738|HPT_HUMAN	K.NYYKLRTEGDGVYTLNDKK.Q	Y	54.29	2276.14	-3.6	759.719	3	33.63	F19:3473	10	54	72
3	16	P00738|HPT_HUMAN	K.GSFPWQAK.M	N	54.05	919.455	-1.1	460.734	2	42.27	F18:5263	6	171	178
3	16	P00738|HPT_HUMAN	K.QLVEIEKVVLHPNYSQVDIGLIK.L	Y	52.61	2633.48	-0.4	878.833	3	58.93	F17:8883	4	229	251
3	16	P00738|HPT_HUMAN	K.TPKSPVGVQPILNEHTFC(+105.06)AGMSK.Y	Y	52.26	2545.28	-0.9	849.434	3	42.42	F17:6165	4	323	345	S-pyridylethylation
3	16	P00738|HPT_HUMAN	R.ILGGHLDAK.G	N	49.51	922.524	-0.1	462.269	2	23.76	F17:2824	18	162	170
3	16	P00738|HPT_HUMAN	R.YQC(+105.06)KNYYK.L	Y	47.15	1213.56	-1.4	607.786	2	9.33	F18:861	9	50	57	S-pyridylethylation
3	16	P00738|HPT_HUMAN	K.DYAEVGR.V	Y	47	808.371	-0.3	405.193	2	21.06	F17:2350	2	271	277
3	16	P00738|HPT_HUMAN	R.VM(+15.99)PIC(+105.06)LPSK.D	N	45.83	1107.58	-0.2	554.798	2	37.24	F17:5230	3	262	270	Oxidation (M); S-pyridylethylation
3	16	P00738|HPT_HUMAN	K.NYYKLR.T	Y	43.6	855.46	0	428.737	2	22.42	F19:2018	6	54	59
3	16	P00738|HPT_HUMAN	K.QKVSVNER.V	Y	42.87	958.52	0.2	480.267	2	7.79	F17:726	10	254	261
3	16	P00738|HPT_HUMAN	K.YVM(+15.99)LPVADQDQC(+105.06)IRHYEGSTVPEKK.T	Y	39.38	3026.46	-0.1	1009.83	3	39.44	F17:5632	4	298	322	Oxidation (M); S-pyridylethylation
3	16	P00738|HPT_HUMAN	K.FTDHLK.Y	Y	39.3	759.391	0.6	380.703	2	17.73	F17:1822	6	292	297
3	16	P00738|HPT_HUMAN	R.VMPIC(+105.06)LPSK.D	N	38.67	1091.59	-1.1	546.8	2	37.3	F17:5241	4	262	270	S-pyridylethylation
3	16	P00738|HPT_HUMAN	K.QWINK.A	N	37.05	687.37	0.2	344.693	2	22.1	F18:2175	5	73	77
3	16	P00738|HPT_HUMAN	K.LPEC(+105.06)EAVC(+105.06)GKPK.N	N	35.62	1482.74	1.5	742.377	2	18.84	F18:1725	4	142	153	S-pyridylethylation
3	16	P00738|HPT_HUMAN	K.VSVNER.V	Y	35.37	702.366	-0.6	352.19	2	9.4	F17:935	3	256	261
3	16	P00738|HPT_HUMAN	K.LKQKVSVNER.V	Y	34.82	1199.7	-0.1	600.856	2	14.27	F17:1378	2	252	261
3	16	P00738|HPT_HUMAN	K.QLVEIEK.V	N	34.66	857.486	-0.5	429.75	2	30.32	F17:3985	4	229	235
3	16	P00738|HPT_HUMAN	K.YVM(+15.99)LPVADQDQCIR.H	Y	34.4	1665.79	-0.7	833.899	2	43.31	F17:6333	1	298	311	Oxidation (M)
3	16	P00738|HPT_HUMAN	K.KQLVEIEK.V	N	31.16	985.581	-3.4	493.796	2	24.19	F17:2913	4	228	235
3	16	P00738|HPT_HUMAN	K.AVGDKLPEC(+105.06)EAVC(+105.06)GKPKNPANPVQR.I	N	29.66	2829.44	-1.8	708.366	4	30.9	F19:3115	1	137	161	S-pyridylethylation
3	16	P00738|HPT_HUMAN	K.KQWINK.A	N	26.46	815.465	0.3	408.74	2	15.71	F19:1290	6	72	77
3	16	P00738|HPT_HUMAN	R.YQC(+105.06)KNYYKLR.T	Y	26.11	1482.74	-1.7	495.255	3	23.43	F18:2374	2	50	59	S-pyridylethylation
3	16	P00738|HPT_HUMAN	K.LPECEAVCGKPK.N	N	25.42	1272.62	-1.2	637.317	2	34.32	F20:2828	1	142	153
3	16	P00738|HPT_HUMAN	R.NANFK.F	Y	23.79	592.297	0.6	297.156	2	7.85	F17:737	3	287	291
7	14	P02751|FINC_HUMAN	R.TEIDKPSQMQVTDVQDNSISVK.W	Y	115.63	2461.2	-2.6	821.405	3	39.19	F19:4141	4	1540	1561
7	14	P02751|FINC_HUMAN	R.TEIDKPSQM(+15.99)QVTDVQDNSISVK.W	Y	114.36	2477.2	-1.2	826.738	3	39.01	F19:4119	7	1540	1561	Oxidation (M)
7	14	P02751|FINC_HUMAN	R.RPGGEPSPEGTTGQSYNQYSQR.Y	Y	100.15	2395.08	-2.7	799.365	3	26.51	F19:2531	6	2335	2356
7	14	P02751|FINC_HUMAN	K.FTQVTPTSLSAQWTPPNVQLTGYR.V	Y	90.89	2691.37	1	1346.69	2	59.74	F16:9602	4	1730	1753
7	14	P02751|FINC_HUMAN	R.NLQPASEYTVSLVAIKGNQESPK.A	Y	86.5	2472.29	-0.8	1237.15	2	47.52	F16:7383	6	1055	1077
7	14	P02751|FINC_HUMAN	R.HTSVQTTSSGSGPFTDVR.A	Y	85.58	1862.88	0.2	932.445	2	30.12	F16:3956	6	273	290
7	14	P02751|FINC_HUMAN	R.VPGTSTSATLTGLTR.G	Y	84.88	1460.78	0.7	731.399	2	39.43	F17:5631	5	2150	2164
7	14	P02751|FINC_HUMAN	R.SSPVVIDASTAIDAPSNLR.F	Y	83.49	1911.99	-0.1	957.002	2	49.34	F17:7336	21	1892	1910
7	14	P02751|FINC_HUMAN	K.GLKPGVVYEGQLISIQQYGHQEVTR.F	Y	80.12	2798.47	-1	933.83	3	48.9	F16:7652	3	670	694
7	14	P02751|FINC_HUMAN	R.ITYGETGGNSPVQEFTVPGSK.S	Y	77.48	2167.04	0.7	1084.53	2	46.95	F16:7272	4	1480	1500
7	14	P02751|FINC_HUMAN	K.TGLDSPTGIDFSDITANSFTVHWIAPR.A	Y	75.03	2917.42	4.1	973.486	3	68.89	F19:7574	3	1356	1382
7	14	P02751|FINC_HUMAN	R.GDSPASSKPISINYR.T	Y	74.73	1590.8	-0.8	796.407	2	31.41	F16:4200	2	1525	1539
7	14	P02751|FINC_HUMAN	R.SYTITGLQPGTDYKIYLYTLNDNAR.S	Y	74.19	2879.43	-0.1	1440.72	2	59.88	F16:9628	5	1867	1891
7	14	P02751|FINC_HUMAN	R.VDVIPVNLPGEHGQR.L	Y	73.09	1628.86	0.3	815.439	2	44.56	F16:6822	4	939	953
7	14	P02751|FINC_HUMAN	R.NTFAEVTGLSPGVTYYFK.V	Y	70.71	1992.98	-0.5	997.498	2	61.28	F16:9862	4	959	976
7	14	P02751|FINC_HUMAN	R.VEYELSEEGDEPQYLDLPSTATSVNIPDLLPGRK.Y	Y	66.48	3773.85	-0.5	1258.96	3	63.82	F16:10275	1	752	785
7	14	P02751|FINC_HUMAN	K.IYLYTLNDNAR.S	Y	66.23	1354.69	0.7	678.352	2	46.12	F17:6798	3	1881	1891
7	14	P02751|FINC_HUMAN	R.VTWAPPPSIDLTNFLVR.Y	Y	65.35	1925.04	1.5	963.529	2	71.65	F16:11480	2	1285	1301
7	14	P02751|FINC_HUMAN	R.FLATTPNSLLVSWQPPR.A	Y	64.83	1926.04	0	964.025	2	63.22	F17:9537	4	1911	1927
7	14	P02751|FINC_HUMAN	R.DAPIVNKVVTPLSPPTNLHLEANPDTGVLTVSWER.S	Y	64.74	3778.99	0.6	1260.67	3	63.07	F16:10155	2	1163	1197
7	14	P02751|FINC_HUMAN	R.ITGYIIKYEKPGSPPR.E	Y	63.83	1818	-0.6	607.008	3	34.56	F16:4826	4	1930	1945
7	14	P02751|FINC_HUMAN	K.TDELPQLVTLPHPNLHGPEILDVPSTVQK.T	Y	62.9	3186.69	-0.1	1063.24	3	59.5	F16:9559	2	1991	2019
7	14	P02751|FINC_HUMAN	R.DLQFVEVTDVK.V	Y	61.68	1291.67	-0.2	646.84	2	50.31	F16:7910	6	912	922
7	14	P02751|FINC_HUMAN	K.DTLTSRPAQGVVTTLENVSPPRR.A	Y	61.39	2493.33	-1.3	832.116	3	48.05	F16:7486	3	1797	1819
7	14	P02751|FINC_HUMAN	R.NLQPASEYTVSLVAIK.G	Y	60.72	1731.94	0	866.978	2	53.48	F16:8494	2	1055	1070
7	14	P02751|FINC_HUMAN	R.WSRPQAPITGYR.I	Y	59.82	1430.74	-1.3	716.377	2	34.32	F16:4777	4	831	842
7	14	P02751|FINC_HUMAN	R.KKTDELPQLVTLPHPNLHGPEILDVPSTVQK.T	Y	59.24	3442.88	-2	1148.63	3	53.65	F16:8522	3	1989	2019
7	14	P02751|FINC_HUMAN	R.SYTITGLQPGTDYK.I	Y	59.1	1542.76	-1.8	772.384	2	41.73	F16:6267	2	1867	1880
7	14	P02751|FINC_HUMAN	R.TKTETITGFQVDAVPANGQTPIQR.T	Y	58.71	2571.33	-1.1	858.116	3	44.68	F16:6846	2	1836	1859
7	14	P02751|FINC_HUMAN	R.EVVPRPRPGVTEATITGLEPGTEYTIYVIALKNNQK.S	Y	58.57	3953.13	0.1	989.289	4	59.01	F16:9478	2	1946	1981
7	14	P02751|FINC_HUMAN	K.WC(+105.06)GTTQNYDADQK.F	Y	56.45	1633.68	-1.1	817.848	2	22.93	F16:2568	2	445	457	S-pyridylethylation
7	14	P02751|FINC_HUMAN	K.KTDELPQLVTLPHPNLHGPEILDVPSTVQK.T	Y	56.11	3314.79	-0.4	829.704	4	56.11	F16:8961	2	1990	2019
7	14	P02751|FINC_HUMAN	R.DGQERDAPIVNKVVTPLSPPTNLHLEANPDTGVLTVSWER.S	Y	56.08	4364.24	-2.1	1092.07	4	60.8	F16:9784	1	1158	1197
7	14	P02751|FINC_HUMAN	R.YYRITYGETGGNSPVQEFTVPGSK.S	Y	55.62	2649.27	-0.2	884.097	3	48.37	F16:7545	1	1477	1500
7	14	P02751|FINC_HUMAN	K.VREEVVTVGNSVNEGLNQPTDDSC(+105.06)FDPYTVSHYAVGDEWER.M	Y	55.36	4717.13	0	1180.29	4	52.79	F16:8367	2	2183	2223	S-pyridylethylation
7	14	P02751|FINC_HUMAN	K.LGVRPSQGGEAPR.E	Y	54.41	1322.71	-0.3	441.909	3	9.37	F16:952	3	1117	1129
7	14	P02751|FINC_HUMAN	R.TFYSC(+105.06)TTEGR.Q	Y	54.14	1268.55	0.6	635.282	2	24.07	F16:2773	2	370	379	S-pyridylethylation
7	14	P02751|FINC_HUMAN	R.DLEVVAATPTSLLISWDAPAVTVR.Y	Y	53.48	2523.36	1.8	1262.69	2	77.11	F16:12239	1	1453	1476
7	14	P02751|FINC_HUMAN	R.GFNC(+105.06)ESKPEAEETC(+105.06)FDKYTGNTYR.V	Y	53.46	2998.29	0.2	1000.44	3	34.02	F16:4722	8	84	107	S-pyridylethylation
7	14	P02751|FINC_HUMAN	K.STATISGLKPGVDYTITVYAVTGRGDSPASSKPISINYR.T	Y	53.38	4042.1	-0.2	1011.53	4	54.04	F16:8589	2	1501	1539
7	14	P02751|FINC_HUMAN	R.QKTGLDSPTGIDFSDITANSFTVHWIAPR.A	Y	52.83	3173.58	0.9	794.403	4	64.12	F16:10323	7	1354	1382
7	14	P02751|FINC_HUMAN	K.VVTPLSPPTNLHLEANPDTGVLTVSWER.S	Y	52.79	3041.58	2.6	1014.87	3	63.57	F17:9588	3	1170	1197
7	14	P02751|FINC_HUMAN	K.WLPSSSPVTGYR.V	Y	52.73	1348.68	0.1	675.346	2	42.61	F16:6438	2	1562	1573
7	14	P02751|FINC_HUMAN	R.IRHHPEHFSGRPR.E	Y	52.43	1624.84	1.4	542.623	3	8.29	F16:771	7	1390	1402
7	14	P02751|FINC_HUMAN	R.WKEATIPGHLNSYTIK.G	Y	52.06	1856.98	-0.8	620	3	39.54	F16:5833	2	654	669
7	14	P02751|FINC_HUMAN	K.VTIMWTPPESAVTGYRVDVIPVNLPGEHGQR.L	Y	51.5	3417.75	4	1140.26	3	61.06	F16:9825	3	923	953
7	14	P02751|FINC_HUMAN	R.ISC(+105.06)TIANR.C	Y	50.21	981.507	-1.4	491.76	2	21.53	F17:2434	12	133	140	S-pyridylethylation
7	14	P02751|FINC_HUMAN	R.EVVPRPRPGVTEATITGLEPGTEYTIYVIALK.N	Y	49.67	3468.89	1.3	1157.3	3	63.23	F16:10181	4	1946	1977
7	14	P02751|FINC_HUMAN	K.NNQKSEPLIGR.K	Y	48.52	1254.67	-1.5	628.34	2	19.49	F16:2020	2	1978	1988
7	14	P02751|FINC_HUMAN	R.FTNIGPDTMR.V	Y	46.51	1150.54	-1.9	576.278	2	35.71	F16:5064	2	1275	1284
7	14	P02751|FINC_HUMAN	K.DDKESVPISDTIIPAVPPPTDLR.F	Y	46.34	2474.29	0.9	825.771	3	56.18	F16:8972	2	1252	1274
7	14	P02751|FINC_HUMAN	R.QYNVGPSVSK.Y	Y	44.59	1077.55	-0.9	539.779	2	23.78	F16:2721	2	1041	1050
7	14	P02751|FINC_HUMAN	R.FTNIGPDTM(+15.99)R.V	Y	44.56	1166.54	-2	584.276	2	35.39	F16:4999	4	1275	1284	Oxidation (M)
7	14	P02751|FINC_HUMAN	R.YSPVKNEEDVAELSISPSDNAVVLTNLLPGTEYVVSVSSVYEQHESTPLR.G	Y	44.1	5460.71	-2.7	1366.18	4	74.49	F16:11878	8	1302	1351
7	14	P02751|FINC_HUMAN	K.TGPMKEINLAPDSSSVVVSGLMVATK.Y	Y	41.27	2630.37	0.7	877.797	3	58.31	F16:9356	3	1762	1787
7	14	P02751|FINC_HUMAN	R.STTPDITGYR.I	Y	40.57	1109.54	-1.6	555.774	2	31.32	F16:4182	2	1198	1207
7	14	P02751|FINC_HUMAN	R.TNTNVNC(+105.06)PIEC(+105.06)FMPLDVQADREDSRE	Y	40.46	3205.43	0.2	1069.48	3	49.83	F16:7822	3	2361	2386	S-pyridylethylation
7	14	P02751|FINC_HUMAN	R.ATITGYR.I	Y	40.45	780.413	-0.1	391.214	2	21.25	F16:2292	2	1383	1389
7	14	P02751|FINC_HUMAN	K.VTIMWTPPESAVTGYR.V	Y	40.1	1806.9	0.1	904.456	2	55.35	F16:8827	2	923	938
7	14	P02751|FINC_HUMAN	R.EVTSDSGSIVVSGLTPGVEYVYTIQVLR.D	Y	38.92	2967.54	-0.2	990.188	3	76.76	F16:12190	10	1130	1157
7	14	P02751|FINC_HUMAN	R.GIGEWHC(+105.06)QPLQTYPSSSGPVEVFITETPSQPNSHPIQWNAPQPSHISK.Y	Y	38.75	5397.59	-3.4	1350.4	4	54.5	F16:8675	2	593	640	S-pyridylethylation
7	14	P02751|FINC_HUMAN	K.STATISGLKPGVDYTITVYAVTGR.G	Y	36.84	2469.31	0.6	824.112	3	56.83	F16:9087	2	1501	1524
7	14	P02751|FINC_HUMAN	K.IGEKWDR.Q	Y	36.59	902.461	0	452.238	2	20.3	F16:2143	4	2260	2266
7	14	P02751|FINC_HUMAN	K.IGDTWR.R	Y	35.9	746.371	0.5	374.193	2	26.71	F16:3277	2	150	155
7	14	P02751|FINC_HUMAN	R.LTVGLTR.R	Y	35.89	758.465	0.3	380.24	2	31.73	F16:4268	2	1029	1035
7	14	P02751|FINC_HUMAN	K.SEPLIGR.K	Y	35.81	770.429	0.2	386.222	2	26.31	F16:3194	2	1982	1988
7	14	P02751|FINC_HUMAN	R.IGDQWDKQHDMGHMMR.C	Y	35.16	1983.85	-0.6	496.969	4	32.34	F16:4394	2	480	495
7	14	P02751|FINC_HUMAN	K.GNQESPK.A	Y	35	758.356	1.5	380.186	2	4.04	F16:319	3	1071	1077
7	14	P02751|FINC_HUMAN	R.LTVGLTRR.G	Y	34.15	914.566	-1.8	458.29	2	25.95	F16:3128	2	1029	1036
7	14	P02751|FINC_HUMAN	R.VTDATETTITISWR.T	Y	32.2	1592.8	-4.1	531.94	3	88.56	F17:12808	20	1822	1835
7	14	P02751|FINC_HUMAN	R.C(+105.06)HEGGQSYK.I	Y	30.36	1112.47	0.4	557.243	2	8.13	F16:742	5	141	149	S-pyridylethylation
7	14	P02751|FINC_HUMAN	K.NSVGR.W	Y	30.36	531.277	0.9	266.646	2	5.51	F16:472	1	649	653
7	14	P02751|FINC_HUMAN	R.VTTTPK.N	Y	29.43	645.37	0.1	323.692	2	6	F16:529	1	1574	1579
7	14	P02751|FINC_HUMAN	R.LPISR.N	Y	26.88	584.365	1.1	293.19	2	18.96	F16:1948	4	954	958
7	14	P02751|FINC_HUMAN	K.DTLTSRPAQGVVTTLENVSPPR.R	Y	26.73	2337.23	1.4	780.085	3	51.34	F16:8103	1	1797	1818
7	14	P02751|FINC_HUMAN	K.YEVSVYALKDTLTSRPAQGVVTTLENVSPPRR.A	Y	26.68	3545.88	1.8	887.48	4	59.33	F16:9529	2	1788	1819
7	14	P02751|FINC_HUMAN	R.GFNC(+105.06)ESKPEAEETC(+105.06)FDK.Y	Y	25.02	2142.9	0.6	715.308	3	27.67	F16:3472	1	84	100	S-pyridylethylation
7	14	P02751|FINC_HUMAN	R.AQITGYR.L	Y	24.97	807.424	0.7	404.719	2	18.06	F16:1828	1	1022	1028
7	14	P02751|FINC_HUMAN	R.FLATTPNSLLVSWQPPRAR.I	Y	22.95	2153.17	0.3	718.732	3	57.79	F16:9262	2	1911	1929
7	14	P02751|FINC_HUMAN	R.WTPPR.A	Y	21.84	655.344	1	328.68	2	24.78	F16:2910	2	1017	1021
16	9	P02647|APOA1_HUMAN	K.DLATVYVDVLKDSGR.D	Y	116.07	1649.86	0.8	825.939	2	61.6	F18:7889	6	37	51
16	9	P02647|APOA1_HUMAN	K.QLNLKLLDNWDSVTSTFSK.L	Y	102.2	2208.14	1.3	1105.08	2	64.73	F18:8265	6	65	83
16	9	P02647|APOA1_HUMAN	R.DYVSQFEGSALGKQLNLK.L	Y	99.51	1996.03	2.9	999.023	2	57.37	F18:7339	1	52	69
16	9	P02647|APOA1_HUMAN	K.VSFLSALEEYTK.K	Y	98.53	1385.71	1	693.862	2	66.93	F18:8514	4	251	262
16	9	P02647|APOA1_HUMAN	R.VKDLATVYVDVLKDSGR.D	Y	98.47	1877.03	-0.7	626.682	3	53.12	F18:6761	6	35	51
16	9	P02647|APOA1_HUMAN	K.LLDNWDSVTSTFSK.L	Y	96.67	1611.78	0.9	806.897	2	56.09	F18:7170	6	70	83
16	9	P02647|APOA1_HUMAN	R.VKDLATVYVDVLKDSGRDYVSQFEGSALGK.Q	Y	95.53	3258.68	-0.1	1087.23	3	64.45	F18:8233	12	35	64
16	9	P02647|APOA1_HUMAN	K.ATEHLSTLSEK.A	Y	95	1214.61	-0.8	608.314	2	20.24	F18:1908	8	220	230
16	9	P02647|APOA1_HUMAN	R.THLAPYSDELRQR.L	Y	91.2	1584.8	0.8	793.408	2	28.59	F18:3162	8	185	197
16	9	P02647|APOA1_HUMAN	R.THLAPYSDELR.Q	Y	89.99	1300.64	1.2	651.329	2	31.52	F18:3628	2	185	195
16	9	P02647|APOA1_HUMAN	K.DLATVYVDVLK.D	Y	89.68	1234.68	0.2	618.348	2	60.32	F18:7723	2	37	47
16	9	P02647|APOA1_HUMAN	R.AHVDALRTHLAPYSDELRQR.L	Y	87.7	2347.21	-1.7	783.411	3	36.5	F18:4401	4	178	197
16	9	P02647|APOA1_HUMAN	K.DSGRDYVSQFEGSALGK.Q	Y	87.62	1814.84	1.1	908.43	2	46.06	F18:5796	6	48	64
16	9	P02647|APOA1_HUMAN	R.DYVSQFEGSALGK.Q	Y	84.52	1399.66	1.4	700.839	2	50.58	F17:7530	4	52	64
16	9	P02647|APOA1_HUMAN	R.VKDLATVYVDVLK.D	Y	83.41	1461.84	-0.5	731.929	2	51.54	F18:6553	7	35	47
16	9	P02647|APOA1_HUMAN	K.DLATVYVDVLKDSGRDYVSQFEGSALGK.Q	Y	75.75	3031.51	1.1	1011.51	3	70.44	F18:8902	8	37	64
16	9	P02647|APOA1_HUMAN	R.LAARLEALKENGGAR.L	Y	75.62	1567.88	-1.6	784.946	2	28.55	F18:3155	6	198	212
16	9	P02647|APOA1_HUMAN	K.LHELQEKLSPLGEEM(+15.99)RDR.A	Y	74.6	2195.1	-0.1	732.707	3	38.1	F18:4643	4	158	175	Oxidation (M)
16	9	P02647|APOA1_HUMAN	K.DSGRDYVSQFEGSALGKQLNLK.L	Y	72.85	2411.21	0.3	804.744	3	53.96	F18:6876	2	48	69
16	9	P02647|APOA1_HUMAN	K.VSFLSALEEYTKKLNTQ	Y	71.09	1970.04	3.6	986.029	2	69.69	F18:8814	3	251	267
16	9	P02647|APOA1_HUMAN	K.VQPYLDDFQKK.W	Y	70.21	1379.71	0.7	690.862	2	35.77	F18:4287	7	121	131
16	9	P02647|APOA1_HUMAN	K.WQEEMELYR.Q	Y	67.77	1282.57	0.6	642.29	2	43.95	F18:5505	2	132	140
16	9	P02647|APOA1_HUMAN	K.VEPLRAELQEGAR.Q	Y	66.39	1466.78	-0.6	734.399	2	33.11	F18:3882	7	143	155
16	9	P02647|APOA1_HUMAN	K.LLDNWDSVTSTFSKLR.E	Y	63.88	1880.96	0.7	627.995	3	60.63	F18:7762	4	70	85
16	9	P02647|APOA1_HUMAN	K.LSPLGEEM(+15.99)R.D	Y	61.7	1046.51	-1.4	524.26	2	36.18	F18:4352	4	165	173	Oxidation (M)
16	9	P02647|APOA1_HUMAN	K.AKPALEDLRQGLLPVLESFK.V	Y	61.44	2223.26	0.3	742.095	3	66.83	F18:8501	5	231	250
16	9	P02647|APOA1_HUMAN	K.ATEHLSTLSEKAKPALEDLR.Q	Y	59.45	2208.18	-0.5	737.065	3	37.43	F18:4537	1	220	239
16	9	P02647|APOA1_HUMAN	R.EQLGPVTQEFWDNLEK.E	Y	58	1931.93	4.1	966.975	2	63.24	F18:8090	3	86	101
16	9	P02647|APOA1_HUMAN	K.LREQLGPVTQEFWDNLEKETEGLRQEMSK.D	Y	56.27	3489.72	0.3	873.437	4	72.32	F17:10841	1	84	112
16	9	P02647|APOA1_HUMAN	K.LSPLGEEMR.D	Y	55.13	1030.51	0.6	516.263	2	36.08	F18:4336	2	165	173
16	9	P02647|APOA1_HUMAN	R.LEALKENGGAR.L	Y	54.75	1156.62	-0.4	579.317	2	18.5	F17:1938	4	202	212
16	9	P02647|APOA1_HUMAN	K.AKPALEDLR.Q	Y	54.07	1011.57	1.2	338.198	3	27.59	F18:3002	7	231	239
16	9	P02647|APOA1_HUMAN	K.WQEEM(+15.99)ELYR.Q	Y	52.76	1298.56	0.2	650.287	2	43.97	F18:5508	3	132	140	Oxidation (M)
16	9	P02647|APOA1_HUMAN	K.LHELQEKLSPLGEEMRDR.A	Y	50.54	2179.11	0	727.376	3	38.14	F18:4649	4	158	175
16	9	P02647|APOA1_HUMAN	K.VQPYLDDFQKKWQEEM(+15.99)ELYR.Q	Y	48.29	2660.26	1.7	887.761	3	55.55	F18:7098	2	121	140	Oxidation (M)
16	9	P02647|APOA1_HUMAN	K.VQPYLDDFQKKWQEEMELYR.Q	Y	41.02	2644.26	0.4	882.429	3	61.81	F17:9323	3	121	140
16	9	P02647|APOA1_HUMAN	R.AHVDALRTHLAPYSDELR.Q	Y	39.2	2063.05	-1.1	516.77	4	38.25	F18:4664	2	178	195
16	9	P02647|APOA1_HUMAN	R.QKVEPLRAELQEGAR.Q	Y	38.37	1722.94	2.9	862.479	2	30.61	F17:4041	6	141	155
16	9	P02647|APOA1_HUMAN	K.LSPLGEEM(+15.99)RDR.A	Y	38.19	1317.63	-2.2	659.823	2	32.25	F18:3743	6	165	175	Oxidation (M)
16	9	P02647|APOA1_HUMAN	R.LAEYHAKATEHLSTLSEK.A	Y	35.62	2027.03	-0.3	676.684	3	28.77	F19:2832	2	213	230
16	9	P02647|APOA1_HUMAN	R.QGLLPVLESFK.V	Y	29.43	1229.7	-0.2	615.858	2	63.63	F18:8139	3	240	250
16	9	P02647|APOA1_HUMAN	K.VSFLSALEEYTKK.L	Y	25.96	1513.8	-0.7	505.608	3	61.45	F18:7869	2	251	263
16	9	P02647|APOA1_HUMAN	K.VQPYLDDFQK.K	Y	25.84	1251.61	-0.3	626.814	2	41.4	F18:5136	1	121	130
35	3	P35908|K22E_HUMAN	R.HGGGGGGFGGGGFGSR.S	Y	130.05	1319.58	-2.1	660.794	2	26.14	F19:2483	7	46	61
35	3	P35908|K22E_HUMAN	R.GGSGGGGSISGGGYGSGGGSGGR.Y	Y	123.73	1740.74	2.7	871.38	2	19.01	F19:1602	2	550	572
35	3	P35908|K22E_HUMAN	R.GFSSGSAVVSGGSR.R	Y	118.53	1253.6	0.1	627.807	2	26.79	F19:2570	4	21	34
35	3	P35908|K22E_HUMAN	R.FLEQQNQVLQTK.W	N	101.88	1474.78	-1	738.395	2	35.64	F19:3708	5	198	209
35	3	P35908|K22E_HUMAN	K.VDLLNQEIEFLK.V	Y	93.4	1459.79	1.4	730.904	2	63.13	F19:6950	3	303	314
35	3	P35908|K22E_HUMAN	R.GSSSGGGYSSGSSSYGSGGR.Q	Y	92.39	1739.7	-0.5	870.856	2	9.44	F19:806	2	525	544
35	3	P35908|K22E_HUMAN	R.NLDLDSIIAEVK.A	N	86.6	1328.72	1.7	665.368	2	65.37	F19:7205	7	342	353
35	3	P35908|K22E_HUMAN	K.AQYEEIAQR.S	N	73.12	1106.54	0.2	554.275	2	25.77	F20:2083	5	354	362
35	3	P35908|K22E_HUMAN	R.NLDLDSIIAEVKAQYEEIAQR.S	N	71.98	2417.24	-0.7	806.755	3	81.4	F19:8693	7	342	362
35	3	P35908|K22E_HUMAN	K.FASFIDKVR.F	N	65.57	1081.59	-0.6	541.803	2	40.11	F19:4256	3	189	197
35	3	P35908|K22E_HUMAN	R.GFSSGSAVVSGGSRR.S	Y	62.18	1409.7	-0.6	705.857	2	23.11	F19:2095	5	21	35
35	3	P35908|K22E_HUMAN	R.STSSFSC(+105.06)LSR.H	Y	56.38	1178.54	-0.1	590.277	2	27.53	F19:2670	5	36	45	S-pyridylethylation
35	3	P35908|K22E_HUMAN	R.TAAENDFVTLK.K	Y	55.67	1207.61	3.9	604.814	2	39.52	F20:3244	4	276	286
35	3	P35908|K22E_HUMAN	K.IEISELNR.V	N	53.63	972.524	-1.8	487.268	2	36.29	F19:3795	2	394	401
35	3	P35908|K22E_HUMAN	R.SLVGLGGTK.S	Y	49.38	830.486	0.1	416.25	2	31.92	F20:2608	6	62	70
35	3	P35908|K22E_HUMAN	K.LLEGEEC(+105.06)R.M	N	47.77	1052.5	-1.2	527.255	2	20.8	F19:1820	3	483	490	S-pyridylethylation
35	3	P35908|K22E_HUMAN	K.GGSISGGGYGSGGGK.H	Y	42.51	1196.54	-5.5	599.275	2	18.55	F19:1551	2	581	595
35	3	P35908|K22E_HUMAN	K.VDPEIQNVKAQER.E	Y	39.21	1524.79	-1.1	763.401	2	26.09	F19:2477	1	167	179
35	3	P35908|K22E_HUMAN	K.KYEDEINKR.T	N	38.41	1193.6	0.1	597.809	2	9.35	F19:791	2	267	275
35	3	P35908|K22E_HUMAN	R.TSQNSELNNM(+15.99)QDLVEDYKK.K	Y	37.38	2271.03	2.1	758.02	3	49.42	F19:5332	2	248	266	Oxidation (M)
35	3	P35908|K22E_HUMAN	R.TSQNSELNNMQDLVEDYKK.K	Y	30.42	2255.04	3.6	752.689	3	49.37	F19:5325	2	248	266
35	3	P35908|K22E_HUMAN	K.GGSISGGGYGSGGGKHSSGGGSR.G	Y	25.37	1921.86	-0.3	641.628	3	9.11	F19:758	1	581	603
35	3	P35908|K22E_HUMAN	R.MSGDLSSNVTVSVTSSTISSNVASK.A	Y	22.36	2457.19	-7.5	820.065	3	40.04	F18:4942	1	491	515
15	13	P01008|ANT3_HUMAN	K.AFLEVNEEGSEAAASTAVVIAGR.S	Y	139.53	2290.14	-0.4	1146.08	2	57.71	F19:6330	39	403	425
15	13	P01008|ANT3_HUMAN	R.FRIEDGFSLKEQLQDMGLVDLFSPEK.S	Y	104.25	3040.52	-2.9	1014.51	3	74.28	F20:6272	12	355	380
15	13	P01008|ANT3_HUMAN	R.EVPLNTIIFMGR.V	Y	97.34	1388.75	-0.1	695.381	2	62.43	F19:6867	7	446	457
15	13	P01008|ANT3_HUMAN	K.ATEDEGSEQKIPEATNR.R	Y	87.94	1873.87	-0.4	937.94	2	22.32	F19:2007	8	62	78
15	13	P01008|ANT3_HUMAN	K.KATEDEGSEQKIPEATNR.R	Y	86.05	2001.96	-2.5	1001.98	2	19.64	F17:2112	3	61	78
15	13	P01008|ANT3_HUMAN	K.VEKELTPEVLQEWLDELEEMMLVVHMPR.F	Y	85.45	3421.7	0.4	1141.57	3	91.39	F17:13130	8	327	354
15	13	P01008|ANT3_HUMAN	R.EVPLNTIIFM(+15.99)GR.V	Y	80.25	1404.74	-1.5	703.378	2	56.64	F20:4762	6	446	457	Oxidation (M)
15	13	P01008|ANT3_HUMAN	K.EQLQDMGLVDLFSPEK.S	Y	72.43	1847.9	0.6	924.957	2	67.35	F17:10156	3	365	380
15	13	P01008|ANT3_HUMAN	K.LQPLDFKENAEQSR.A	Y	71.69	1673.84	-0.5	837.926	2	37	F17:5186	5	202	215
15	13	P01008|ANT3_HUMAN	K.SLAKVEKELTPEVLQEWLDELEEMMLVVHMPR.F	Y	68.07	3820.95	-0.2	1274.66	3	90.63	F17:13046	5	323	354
15	13	P01008|ANT3_HUMAN	R.FATTFYQHLADSKNDNDNIFLSPLSISTAFAMTK.L	Y	63.23	3807.85	0.9	1270.29	3	71.98	F17:10795	2	90	123
15	13	P01008|ANT3_HUMAN	R.VAEGTQVLELPFKGDDITMVLILPKPEK.S	Y	60.99	3079.69	1	1027.57	3	67.89	F16:10905	6	295	322
15	13	P01008|ANT3_HUMAN	R.SLNPNRVTFK.A	Y	55.59	1174.65	-1	588.33	2	30.55	F19:3069	8	426	435
15	13	P01008|ANT3_HUMAN	K.ANRPFLVFIR.E	Y	51.57	1231.72	-1.2	616.866	2	52.77	F19:5729	6	436	445
15	13	P01008|ANT3_HUMAN	R.RVAEGTQVLELPFKGDDITMVLILPKPEK.S	Y	51.11	3235.79	-0.2	809.954	4	65.19	F17:9836	4	294	322
15	13	P01008|ANT3_HUMAN	R.SPEKKATEDEGSEQKIPEATNR.R	Y	50.48	2443.18	-2.3	611.802	4	19.56	F17:2099	1	57	78
15	13	P01008|ANT3_HUMAN	R.ITDVIPSEAINELTVLVLVNTIYFK.G	Y	49.02	2803.56	3.7	935.532	3	99.01	F16:14913	7	230	254
15	13	P01008|ANT3_HUMAN	R.IEDGFSLKEQLQDMGLVDLFSPEK.S	Y	48.55	2737.35	0.7	913.459	3	73.37	F17:10962	4	357	380
15	13	P01008|ANT3_HUMAN	R.RVWELSK.A	Y	48.45	916.513	0	459.264	2	29.5	F19:2932	4	79	85
15	13	P01008|ANT3_HUMAN	R.DIPMNPMC(+105.06)IYR.S	Y	39.85	1456.67	-0.9	729.34	2	47.8	F16:7435	4	46	56	S-pyridylethylation
15	13	P01008|ANT3_HUMAN	K.KATEDEGSEQKIPEATNRR.V	Y	38.02	2158.06	1.7	720.362	3	17	F17:1716	3	61	79
15	13	P01008|ANT3_HUMAN	K.SKLPGIVAEGR.D	Y	37.66	1125.65	-0.3	563.832	2	30.78	F16:4078	1	381	391
15	13	P01008|ANT3_HUMAN	R.DIPMNPM(+15.99)C(+105.06)IYR.S	Y	36.94	1472.66	-1.3	737.337	2	47.88	F16:7453	4	46	56	Oxidation (M); S-pyridylethylation
15	13	P01008|ANT3_HUMAN	K.ATEDEGSEQKIPEATNRR.V	Y	35.61	2029.97	-0.6	677.662	3	20.05	F17:2182	5	62	79
15	13	P01008|ANT3_HUMAN	K.SKLPGIVAEGRDDLYVSDAFHK.A	Y	35.2	2416.24	-1.9	605.066	4	92.88	F17:13289	6	381	402
15	13	P01008|ANT3_HUMAN	K.TSDQIHFFFAK.L	Y	34.41	1339.66	-0.9	447.559	3	50.35	F16:7918	2	147	157
15	13	P01008|ANT3_HUMAN	R.SLNPNR.V	Y	33.86	699.366	1	350.691	2	9.45	F20:766	3	426	431
15	13	P01008|ANT3_HUMAN	R.VWELSK.A	Y	33.82	760.412	0.6	381.214	2	35.03	F16:4922	4	80	85
15	13	P01008|ANT3_HUMAN	R.DIPM(+15.99)NPM(+15.99)C(+105.06)IYR.S	Y	32.93	1488.66	-1.3	745.335	2	47.87	F16:7450	6	46	56	Oxidation (M); S-pyridylethylation
15	13	P01008|ANT3_HUMAN	R.VANPC(+105.06)VK	Y	32	834.442	-0.3	418.228	2	9.51	F20:775	1	458	464	S-pyridylethylation
15	13	P01008|ANT3_HUMAN	R.VAEGTQVLELPFKGDDITM(+15.99)VLILPKPEK.S	Y	28.93	3095.68	-1.8	774.927	4	68.16	F17:10269	4	295	322	Oxidation (M)
15	13	P01008|ANT3_HUMAN	K.ATEDEGSEQK.I	Y	27.27	1092.46	-1.7	547.235	2	5.78	F16:504	1	62	71
15	13	P01008|ANT3_HUMAN	R.LFGDK.S	Y	27.02	578.306	1.1	290.161	2	22.71	F17:2647	1	178	182
15	13	P01008|ANT3_HUMAN	K.LQPLDFK.E	Y	20.49	859.48	0	430.747	2	42.07	F17:6106	4	202	208
25	6	P13645|K1C10_HUMAN	K.GSLGGGFSSGGFSGGSFSR.G	Y	123.33	1706.76	-1.7	854.388	2	45.99	F19:4928	4	41	59
25	6	P13645|K1C10_HUMAN	R.NVSTGDVNVEMNAAPGVDLTQLLNNMR.S	Y	120.05	2871.39	-3.5	1436.7	2	71.92	F19:7877	7	296	322
25	6	P13645|K1C10_HUMAN	R.SLLEGEGSSGGGGR.G	Y	109.41	1261.59	0.5	631.803	2	26.26	F20:2138	4	451	464
25	6	P13645|K1C10_HUMAN	R.NVSTGDVNVEM(+15.99)NAAPGVDLTQLLNNM(+15.99)R.S	Y	94.86	2903.38	-0.2	968.799	3	59.87	F19:6585	9	296	322	Oxidation (M)
25	6	P13645|K1C10_HUMAN	K.TIDDLKNQILNLTTDNANILLQIDNAR.L	Y	88.85	3051.62	1	1018.22	3	75.83	F19:8239	5	202	228
25	6	P13645|K1C10_HUMAN	R.SQYEQLAEQNRK.D	Y	88.3	1492.73	-0.3	747.37	2	23.7	F19:2169	13	323	334
25	6	P13645|K1C10_HUMAN	R.SGGGGGGGGC(+105.06)GGGGGVSSLR.I	Y	85.95	1596.71	0.3	799.361	2	19.8	F19:1694	4	16	35	S-pyridylethylation
25	6	P13645|K1C10_HUMAN	R.ALEESNYELEGK.I	Y	85.82	1380.64	1.4	691.329	2	32.69	F20:2675	4	166	177
25	6	P13645|K1C10_HUMAN	R.SQYEQLAEQNR.K	Y	82.91	1364.63	-0.7	683.323	2	27.89	F19:2712	2	323	333
25	6	P13645|K1C10_HUMAN	R.NVSTGDVNVEM(+15.99)NAAPGVDLTQLLNNMR.S	Y	81.46	2887.38	0.1	963.467	3	68.7	F19:7551	6	296	322	Oxidation (M)
25	6	P13645|K1C10_HUMAN	K.VTMQNLNDR.L	N	76.28	1089.52	-1.4	545.768	2	26.67	F19:2552	2	148	156
25	6	P13645|K1C10_HUMAN	K.IRLENEIQTYR.S	Y	73.92	1433.76	-1	717.888	2	37.18	F19:3898	2	440	450
25	6	P13645|K1C10_HUMAN	K.DAEAWFNEK.S	N	67.66	1108.48	-1.2	555.248	2	43.98	F20:3599	4	335	343
25	6	P13645|K1C10_HUMAN	R.LAADDFR.L	N	64.61	806.392	0.5	404.204	2	29.85	F20:2438	8	229	235
25	6	P13645|K1C10_HUMAN	R.LASYLDKVR.A	N	64.15	1063.6	-1.3	532.808	2	32.31	F19:3293	2	157	165
25	6	P13645|K1C10_HUMAN	R.LKYENEVALR.Q	Y	63.64	1233.67	0.9	617.844	2	31.98	F19:3253	6	236	245
25	6	P13645|K1C10_HUMAN	K.YENEVALR.Q	Y	62.92	992.493	-1.7	497.253	2	28.04	F19:2731	4	238	245
25	6	P13645|K1C10_HUMAN	R.LENEIQTYR.S	Y	59.08	1164.58	-1.2	583.295	2	30.27	F20:2473	2	442	450
25	6	P13645|K1C10_HUMAN	R.DYSKYYK.T	Y	49.09	965.449	-0.7	483.732	2	25.21	F19:2358	2	195	201
25	6	P13645|K1C10_HUMAN	K.SKELTTEIDNNIEQISSYKSEITELRR.N	Y	46.13	3195.63	0.4	799.914	4	56.67	F17:8519	2	344	370
25	6	P13645|K1C10_HUMAN	K.SEITELRR.N	Y	40.62	1002.55	-1.2	502.279	2	24.09	F19:2221	3	363	370
25	6	P13645|K1C10_HUMAN	R.QSVEADINGLRR.V	N	40.53	1356.71	-0.2	679.363	2	35.43	F19:3681	3	246	257
25	6	P13645|K1C10_HUMAN	R.VLDELTLTKADLEM(+15.99)QIESLTEELAYLKK.N	Y	38.11	3251.71	0.6	813.935	4	79.63	F17:11764	4	258	285	Oxidation (M)
25	6	P13645|K1C10_HUMAN	R.VLDELTLTKADLEMQIESLTEELAYLKK.N	Y	38.01	3235.71	0.7	809.937	4	80.39	F17:11854	3	258	285
25	6	P13645|K1C10_HUMAN	R.NVSTGDVNVEMNAAPGVDLTQLLNNM(+15.99)R.S	Y	36.51	2887.38	-2.1	963.465	3	71.96	F19:7882	1	296	322	Oxidation (M)
25	6	P13645|K1C10_HUMAN	K.NHEEEMKDLR.N	Y	35.55	1299.59	-0.2	434.203	3	18.47	F17:1934	5	286	295
25	6	P13645|K1C10_HUMAN	R.VLDELTLTK.A	Y	24.12	1030.59	-1.6	516.302	2	42.24	F19:4504	1	258	266
25	6	P13645|K1C10_HUMAN	R.LAADDFRLK.Y	N	23.23	1047.57	-0.3	524.793	2	37.55	F19:3945	1	229	237
25	6	P13645|K1C10_HUMAN	R.LASYLDK.V	N	20.97	808.433	0.5	405.224	2	27.76	F19:2697	2	157	163
25	6	P13645|K1C10_HUMAN	K.QSLEASLA(+138.10)ETEGR.Y	Y	19.94	1527.78	4.3	510.269	3	30.64	F16:4052	1	387	399	SLHNE+Delta H(2)O (AL)
13	86	P01834|IGKC_HUMAN	K.VDNALQSGNSQESVTEQDSK.D	Y	136.15	2134.96	-1.9	1068.49	2	25.52	F18:2696	6	42	61
13	86	P01834|IGKC_HUMAN	K.VYAC(+105.06)EVTHQGLSSPVTK.S	Y	119.58	1922.96	-2.7	962.483	2	30.6	F19:3076	19	83	99	S-pyridylethylation
13	86	P01834|IGKC_HUMAN	K.VDNALQSGNSQESVTEQDSKDSTYSLSSTLTLSK.A	Y	111.18	3618.7	-3.4	1207.24	3	47.13	F20:3859	38	42	75
13	86	P01834|IGKC_HUMAN	K.HKVYAC(+105.06)EVTHQGLSSPVTK.S	Y	101.36	2188.11	-2.1	730.376	3	27.48	F18:2987	6	81	99	S-pyridylethylation
13	86	P01834|IGKC_HUMAN	K.VQWKVDNALQSGNSQESVTEQDSKDSTYSLSSTLTLSK.A	Y	100.18	4160	-5	1387.67	3	51.44	F18:6539	35	38	75
13	86	P01834|IGKC_HUMAN	TVAAPSVFIFPPSDEQLK.S	Y	98.68	1945.02	1.2	973.518	2	61.58	F18:7887	22	1	18
13	86	P01834|IGKC_HUMAN	K.SGTASVVC(+105.06)LLNNFYPR.E	Y	98.26	1844.92	-2.1	923.467	2	59.61	F19:6555	20	19	34	S-pyridylethylation
13	86	P01834|IGKC_HUMAN	K.SGTASVVC(+105.06)LLNNFYPREAK.V	Y	97.26	2173.1	-1.9	1087.55	2	55.27	F18:7060	6	19	37	S-pyridylethylation
13	86	P01834|IGKC_HUMAN	TVA(+156.12)APSVFIFPPSDEQLK.S	Y	93.38	2101.13	-6.2	1051.57	2	54.26	F18:6917	5	1	18	SL-HNE (A)
13	86	P01834|IGKC_HUMAN	K.ADYEKHKVYAC(+105.06)EVTHQGLSSPVTK.S	Y	89.09	2794.37	-1.8	932.464	3	31.71	F19:3218	22	76	99	S-pyridylethylation
13	86	P01834|IGKC_HUMAN	K.VQWKVDNALQSGNSQESVTEQDSK.D	Y	84.65	2676.26	1.7	893.096	3	38.33	F18:4677	1	38	61
13	86	P01834|IGKC_HUMAN	TVAAPSVFIFPPSDEQLKSGTASVVC(+105.06)LLNNFYPR.E	Y	67.25	3771.93	0.6	1258.32	3	76.75	F18:9525	15	1	34	S-pyridylethylation
13	86	P01834|IGKC_HUMAN	K.VDNALQSGNSQESVTEQDSKDSTYSLSSTLTLSKADYEK.H	Y	63	4224.97	-7.5	1409.32	3	46.54	F18:5864	5	42	80
13	86	P01834|IGKC_HUMAN	K.SFNRGEC(+105.06)	Y	36.53	916.386	-0.6	459.2	2	9.33	F18:859	7	100	106	S-pyridylethylation
13	86	P01834|IGKC_HUMAN	K.VYAC(+105.06)EVTHQ(+158.13)GLSSPVTKSFNR.G	Y	20.31	2585.33	-4.5	862.78	3	63.51	F18:8124	1	83	103	S-pyridylethylation; SL-HNE+Delta H(2) (RQN)
8	40	P01876|IGHA1_HUMAN	R.QEPSQGTTTFAVTSILR.V	N	141.16	1834.94	0.3	918.479	2	55.07	F19:6008	77	283	299
8	40	P01876|IGHA1_HUMAN	K.TFTC(+105.06)TAAYPESK.T	Y	98.09	1422.65	0.5	712.332	2	27.72	F18:3020	13	201	212	S-pyridylethylation
8	40	P01876|IGHA1_HUMAN	K.KGDTFSC(+105.06)MVGHEALPLAFTQK.T	N	95.11	2384.17	1	1193.09	2	48.68	F17:7224	8	307	327	S-pyridylethylation
8	40	P01876|IGHA1_HUMAN	K.YLTWASRQEPSQGTTTFAVTSILR.V	N	85.43	2712.39	1.1	905.137	3	58.6	F18:7499	4	276	299
8	40	P01876|IGHA1_HUMAN	K.TFTC(+105.06)TAAYPESKTPLTATLSK.S	Y	84.89	2335.18	0	1168.6	2	40.24	F17:5780	8	201	221	S-pyridylethylation
8	40	P01876|IGHA1_HUMAN	R.WLQGSQELPREK.Y	N	81.01	1469.76	-1.7	735.887	2	32.51	F18:3789	4	264	275
8	40	P01876|IGHA1_HUMAN	K.KGDTFSC(+105.06)M(+15.99)VGHEALPLAFTQK.T	N	78.62	2400.16	0.8	1201.09	2	48.68	F17:7225	16	307	327	S-pyridylethylation; Oxidation (M)
8	40	P01876|IGHA1_HUMAN	K.GDTFSC(+105.06)MVGHEALPLAFTQK.T	N	76.73	2256.07	0.7	1129.04	2	52.45	F17:7833	8	308	327	S-pyridylethylation
8	40	P01876|IGHA1_HUMAN	R.NFPPSQDASGDLYTTSSQLTLPATQC(+105.06)LAGK.S	Y	72.7	3215.54	-3.6	1072.85	3	53.62	F18:6830	26	52	81	S-pyridylethylation
8	40	P01876|IGHA1_HUMAN	K.SGNTFRPEVHLLPPPSEELALNELVTLTC(+105.06)LAR.G	N	72.56	3620.9	-0.1	906.233	4	73.23	F19:8009	54	222	253	S-pyridylethylation
8	40	P01876|IGHA1_HUMAN	R.WLQGSQELPR.E	N	68.92	1212.63	0.1	607.32	2	38.44	F18:4694	6	264	273
8	40	P01876|IGHA1_HUMAN	R.DASGVTFTWTPSSGK.S	Y	66.73	1539.72	-0.7	770.867	2	47.86	F16:7448	6	154	168
8	40	P01876|IGHA1_HUMAN	R.VAAEDWKKGDTFSC(+105.06)MVGHEALPLAFTQK.T	N	66.24	3183.55	0.8	1062.19	3	51.38	F17:7657	10	300	327	S-pyridylethylation
8	40	P01876|IGHA1_HUMAN	R.GFSPKDVLVR.W	N	64.64	1116.63	-0.5	559.322	2	39.8	F17:5701	8	254	263
8	40	P01876|IGHA1_HUMAN	K.GDTFSC(+105.06)M(+15.99)VGHEALPLAFTQK.T	N	63.65	2272.07	0.9	758.363	3	52.29	F17:7806	3	308	327	S-pyridylethylation; Oxidation (M)
8	40	P01876|IGHA1_HUMAN	K.VFPLSLC(+105.06)STQPDGNVVIAC(+105.06)LVQGFFPQEPLSVTWSESGQGVTAR.N	Y	60.14	4873.42	-0.8	1219.36	4	82.87	F17:12149	6	8	51	S-pyridylethylation
8	40	P01876|IGHA1_HUMAN	K.SAVQGPPER.D	N	54.93	939.477	-0.2	470.746	2	9.68	F17:987	8	169	177
8	40	P01876|IGHA1_HUMAN	K.YLTWASR.Q	N	54.48	895.455	-0.5	448.735	2	37.72	F18:4581	8	276	282
8	40	P01876|IGHA1_HUMAN	K.TPLTATLSK.S	Y	51.6	930.539	-2.8	466.275	2	34.04	F17:4672	2	213	221
8	40	P01876|IGHA1_HUMAN	R.VAAEDWKKGDTFSC(+105.06)M(+15.99)VGHEALPLAFTQK.T	N	47.65	3199.55	-0.9	1067.52	3	51.49	F17:7675	5	300	327	S-pyridylethylation; Oxidation (M)
8	40	P01876|IGHA1_HUMAN	R.VAAEDWKK.G	N	47.5	945.492	-0.8	473.753	2	18.83	F17:1986	4	300	307
8	40	P01876|IGHA1_HUMAN	R.VAAEDWK.K	N	45.58	817.397	0	409.706	2	24.57	F17:2982	4	300	306
8	40	P01876|IGHA1_HUMAN	R.DLC(+105.06)GC(+105.06)YSVSSVLPGC(+105.06)AEPWNHGK.T	Y	39.42	2736.23	0.1	913.084	3	45.42	F17:6687	3	178	200	S-pyridylethylation
8	40	P01876|IGHA1_HUMAN	K.DVLVR.W	N	33.5	600.36	0.9	301.187	2	21.32	F16:2304	3	259	263
8	40	P01876|IGHA1_HUMAN	R.EKYLTWASR.Q	N	25.51	1152.59	1	385.205	3	35.99	F17:5003	2	274	282
8	40	P01876|IGHA1_HUMAN	K.SVTC(+105.06)HVK.H	N	19.87	877.448	0.4	439.731	2	8.2	F16:756	6	82	88	S-pyridylethylation
12	26	P01871|IGHM_HUMAN	K.QVGSGVTTDQVQAEAK.E	Y	121.47	1616.8	-0.8	809.407	2	27.24	F19:2632	9	154	169
12	26	P01871|IGHM_HUMAN	R.EGKQVGSGVTTDQVQAEAK.E	Y	119.01	1930.96	-0.7	966.486	2	24.26	F19:2243	12	151	169
12	26	P01871|IGHM_HUMAN	R.GQPLSPEKYVTSAPMPEPQAPGR.Y	N	85.39	2436.21	-1.9	1219.11	2	43.66	F16:6646	8	369	391
12	26	P01871|IGHM_HUMAN	R.GQPLSPEKYVTSAPM(+15.99)PEPQAPGR.Y	N	82.67	2452.21	0.3	1227.11	2	43.99	F17:6455	11	369	391	Oxidation (M)
12	26	P01871|IGHM_HUMAN	R.FTC(+105.06)TVTHTDLPSPLK.Q	N	79.5	1763.89	-0.1	882.953	2	38.51	F16:5625	10	301	315	S-pyridylethylation
12	26	P01871|IGHM_HUMAN	R.ESATITC(+105.06)LVTGFSPADVFVQWMQR.G	N	77.25	2790.35	1.1	931.125	3	78.95	F19:8488	8	345	368	S-pyridylethylation
12	26	P01871|IGHM_HUMAN	K.SKLIC(+105.06)QATGFSPR.Q	N	74.54	1511.79	0.1	756.903	2	31.21	F17:4144	8	130	142	S-pyridylethylation
12	26	P01871|IGHM_HUMAN	K.YVTSAPM(+15.99)PEPQAPGR.Y	N	73.88	1615.77	0	808.89	2	35.16	F17:4857	6	377	391	Oxidation (M)
12	26	P01871|IGHM_HUMAN	R.GGKYAATSQVLLPSKDVMQGTDEHVVC(+105.06)K.V	Y	68.68	3065.53	-2.1	1022.85	3	37.79	F16:5482	6	62	89	S-pyridylethylation
12	26	P01871|IGHM_HUMAN	K.NVPLPVIAELPPKVSVFVPPR.D	Y	65.21	2267.34	0.6	1134.68	2	64.93	F16:10447	10	100	120
12	26	P01871|IGHM_HUMAN	K.YAATSQVLLPSKDVMQGTDEHVVC(+105.06)K.V	Y	64.99	2823.39	1.6	942.14	3	40.2	F16:5966	7	65	89	S-pyridylethylation
12	26	P01871|IGHM_HUMAN	R.VFAIPPSFASIFLTK.S	N	64.36	1636.92	1.3	819.47	2	76.49	F17:11354	6	224	238
12	26	P01871|IGHM_HUMAN	K.LIC(+105.06)QATGFSPR.Q	N	61.97	1296.66	0.4	649.34	2	32.85	F17:4448	8	132	142	S-pyridylethylation
12	26	P01871|IGHM_HUMAN	R.GGKYAATSQVLLPSK.D	Y	60.71	1518.84	-0.6	760.427	2	33.31	F16:4586	4	62	76
12	26	P01871|IGHM_HUMAN	K.YAATSQVLLPSKDVM(+15.99)QGTDEHVVC(+105.06)K.V	Y	59.7	2839.39	0.3	947.47	3	40.23	F16:5971	12	65	89	Oxidation (M); S-pyridylethylation
12	26	P01871|IGHM_HUMAN	K.NVPLPVIAELPPK.V	Y	59.48	1385.83	0.7	693.922	2	57.41	F16:9193	12	100	112
12	26	P01871|IGHM_HUMAN	K.GVALHRPDVYLLPPAR.E	N	57.95	1773	-1.1	887.509	2	43.15	F16:6548	6	323	338
12	26	P01871|IGHM_HUMAN	K.VSVFVPPRDGFFGNPR.K	N	56.48	1789.93	-0.2	895.97	2	51.51	F16:8136	6	113	128
12	26	P01871|IGHM_HUMAN	K.VSVFVPPR.D	N	55.58	899.523	0.3	450.769	2	37.42	F16:5412	4	113	120
12	26	P01871|IGHM_HUMAN	R.GGKYAATSQVLLPSKDVM(+15.99)QGTDEHVVC(+105.06)K.V	Y	53.66	3081.53	-3.3	1028.18	3	37.83	F16:5490	4	62	89	Oxidation (M); S-pyridylethylation
12	26	P01871|IGHM_HUMAN	R.QIQVSWLR.E	Y	52.01	1028.58	-1.1	515.295	2	48.94	F18:6194	6	143	150
12	26	P01871|IGHM_HUMAN	R.FTC(+105.06)TVTHTDLPSPLKQTISRPK.G	N	50.96	2574.36	-1.4	859.127	3	37.69	F16:5463	3	301	322	S-pyridylethylation
12	26	P01871|IGHM_HUMAN	R.DGFFGNPR.K	N	49.32	908.414	-0.8	455.214	2	39.06	F17:5569	4	121	128
12	26	P01871|IGHM_HUMAN	K.GVALHRPDVYLLPPAREQLNLR.E	N	48.91	2526.42	0.6	843.147	3	47.56	F17:7028	8	323	344
12	26	P01871|IGHM_HUMAN	K.DVM(+15.99)QGTDEHVVC(+105.06)K.V	Y	44.06	1580.7	-1.9	791.354	2	25.13	F16:2980	1	77	89	Oxidation (M); S-pyridylethylation
12	26	P01871|IGHM_HUMAN	R.GFPSVLRGGK.Y	Y	42.42	1016.58	-1.9	509.295	2	35.63	F17:4937	2	55	64
12	26	P01871|IGHM_HUMAN	R.TVDKSTGKPTLYNVSLVMSDTAGTC(+105.06)Y	N	40.56	2855.37	0.8	952.799	3	51.6	F16:8155	2	427	452	S-pyridylethylation
12	26	P01871|IGHM_HUMAN	R.GFPSVLR.G	Y	39.97	774.439	-1.6	388.226	2	41.04	F18:5084	8	55	61
12	26	P01871|IGHM_HUMAN	K.VSVFVPPRDGFFGNPRK.S	N	37.29	1918.02	0.4	640.348	3	46.58	F16:7202	4	113	129
12	26	P01871|IGHM_HUMAN	R.DGFFGNPRK.S	N	34.43	1036.51	-1.4	519.261	2	30.8	F16:4081	2	121	129
12	26	P01871|IGHM_HUMAN	K.NVPLPVIAELPPKVSVFVPPRDGFFGNPR.K	Y	33.61	3157.74	2.4	1053.59	3	68.5	F16:11002	9	100	128
12	26	P01871|IGHM_HUMAN	K.YAATSQVLLPSK.D	Y	33.35	1276.7	0.2	639.359	2	37.18	F16:5366	1	65	76
12	26	P01871|IGHM_HUMAN	R.EQLNLRESATITC(+105.06)LVTGFSPADVFVQWMQR.G	N	28.83	3543.76	-3.3	886.945	4	79.83	F20:6710	4	339	368	S-pyridylethylation
21	37	P02649|APOE_HUMAN	K.VQAAVGTSAAPVPSDNH	Y	115.89	1619.79	-1	810.902	2	28.45	F19:2788	4	301	317
21	37	P02649|APOE_HUMAN	R.AATVGSLAGQPLQER.A	Y	102.24	1496.79	-0.5	749.404	2	36.83	F19:3855	8	210	224
21	37	P02649|APOE_HUMAN	K.AYKSELEEQLTPVAEETR.A	Y	100.12	2092.03	-0.4	1047.02	2	42.06	F17:6105	4	91	108
21	37	P02649|APOE_HUMAN	R.WVQTLSEQVQEELLSSQVTQELR.A	Y	96.7	2729.39	-0.1	1365.7	2	67.86	F17:10227	10	57	79
21	37	P02649|APOE_HUMAN	R.VRAATVGSLAGQPLQER.A	Y	89.08	1751.96	0.5	876.99	2	35.03	F17:4835	3	208	224
21	37	P02649|APOE_HUMAN	K.SELEEQLTPVAEETR.A	Y	88.09	1729.84	-1.1	865.925	2	42.1	F17:6112	2	94	108
21	37	P02649|APOE_HUMAN	R.LAVYQAGAR.E	Y	74.92	947.519	-0.6	474.766	2	27.18	F19:2624	4	177	185
21	37	P02649|APOE_HUMAN	R.DRLDEVKEQVAEVR.A	Y	74.56	1684.87	-0.3	843.444	2	38.98	F17:5555	6	245	258
21	37	P02649|APOE_HUMAN	R.LSKELQAAQAR.L	Y	71.06	1213.68	-1.3	607.845	2	20.43	F17:2245	6	111	121
21	37	P02649|APOE_HUMAN	R.LKSWFEPLVEDMQR.Q	Y	70.67	1776.89	0	889.451	2	61.37	F17:9254	3	279	292
21	37	P02649|APOE_HUMAN	K.SWFEPLVEDMQR.Q	Y	68.48	1535.71	0.4	768.861	2	63.71	F17:9612	2	281	292
21	37	P02649|APOE_HUMAN	R.AKLEEQAQQIR.L	Y	68.24	1312.71	-0.5	657.362	2	23.06	F17:2704	6	259	269
21	37	P02649|APOE_HUMAN	R.LGADMEDVC(+105.06)GR.L	Y	67	1269.55	0.7	635.782	2	31.39	F17:4174	2	122	132	S-pyridylethylation
21	37	P02649|APOE_HUMAN	R.LGPLVEQGR.V	Y	62.45	967.545	-1.5	484.779	2	31.22	F18:3582	6	199	207
21	37	P02649|APOE_HUMAN	R.LGADM(+15.99)EDVC(+105.06)GR.L	Y	59.55	1285.54	0.2	643.779	2	31.38	F17:4172	6	122	132	Oxidation (M); S-pyridylethylation
21	37	P02649|APOE_HUMAN	R.TRDRLDEVKEQVAEVR.A	Y	58.34	1942.02	0.3	648.348	3	35.26	F17:4875	5	243	258
21	37	P02649|APOE_HUMAN	K.RLAVYQAGAR.E	Y	51.06	1103.62	-1.8	552.816	2	23.38	F17:2761	2	176	185
21	37	P02649|APOE_HUMAN	R.WELALGR.F	Y	48.04	843.46	0.2	422.738	2	48.25	F17:7150	2	44	50
21	37	P02649|APOE_HUMAN	R.LLRDADDLQK.R	Y	47.95	1185.64	0.5	396.219	3	25.68	F17:3163	4	166	175
21	37	P02649|APOE_HUMAN	R.AQAWGER.L	Y	44.16	816.388	-0.5	409.201	2	21.06	F17:2351	3	225	231
21	37	P02649|APOE_HUMAN	R.AQAWGERLR.A	Y	42.62	1085.57	-1.4	543.793	2	28.66	F19:2816	3	225	233
21	37	P02649|APOE_HUMAN	R.ALMDETM(+15.99)KELK.A	Y	41.9	1323.64	0.4	662.828	2	31.91	F17:4271	2	80	90	Oxidation (M)
21	37	P02649|APOE_HUMAN	R.ALM(+15.99)DETM(+15.99)K.E	Y	41.68	969.415	-0.6	485.714	2	31.1	F17:4125	2	80	87	Oxidation (M)
21	37	P02649|APOE_HUMAN	R.LLRDADDLQKR.L	Y	41.01	1341.74	-0.4	448.253	3	22.95	F17:2686	4	166	176
21	37	P02649|APOE_HUMAN	R.FWDYLR.W	Y	37.49	898.434	-0.2	450.224	2	50.45	F17:7509	2	51	56
21	37	P02649|APOE_HUMAN	R.GLSAIRER.L	Y	35.05	900.514	-1.1	451.264	2	20.38	F17:2236	8	191	198
21	37	P02649|APOE_HUMAN	R.ALM(+15.99)DETM(+15.99)KELK.A	Y	32.18	1339.64	-0.7	447.552	3	31.9	F17:4268	4	80	90	Oxidation (M)
21	37	P02649|APOE_HUMAN	R.QWAGLVEK.V	Y	30.11	929.497	0.5	465.756	2	37.45	F17:5273	2	293	300
21	37	P02649|APOE_HUMAN	K.LEEQAQQIR.L	Y	27.03	1113.58	5.2	557.799	2	21.62	F19:1914	1	261	269
21	37	P02649|APOE_HUMAN	R.GLSAIR.E	Y	26.28	615.37	0.8	308.693	2	22.8	F17:2662	1	191	196
14	22	P08603|CFAH_HUMAN	R.NTEILTGSWSDQTYPEGTQAIYK.C	Y	121.2	2601.22	-2.8	1301.62	2	52.02	F19:5642	10	29	51
14	22	P08603|CFAH_HUMAN	R.DTSC(+105.06)VNPPTVQNAYIVSR.Q	Y	86.65	2068	-0.3	1035.01	2	39.91	F17:5721	6	1045	1062	S-pyridylethylation
14	22	P08603|CFAH_HUMAN	R.EC(+105.06)ELPKIDVHLVPDR.K	Y	80.5	1866.97	-0.7	934.49	2	44.64	F16:6838	5	568	582	S-pyridylethylation
14	22	P08603|CFAH_HUMAN	K.TDC(+105.06)LSLPSFENAIPMGEK.K	Y	78.47	2055.96	1.2	1028.99	2	55.82	F16:8912	5	987	1004	S-pyridylethylation
14	22	P08603|CFAH_HUMAN	K.TDC(+105.06)LSLPSFENAIPMGEKK.D	Y	72.24	2184.06	0.2	729.027	3	51.65	F16:8163	4	987	1005	S-pyridylethylation
14	22	P08603|CFAH_HUMAN	K.SPDVINGSPISQK.I	Y	71.19	1340.69	0.2	671.354	2	33.27	F16:4579	3	212	224
14	22	P08603|CFAH_HUMAN	K.SSNLIILEEHLK.N	Y	70.66	1394.78	-1.2	698.395	2	49.3	F17:7328	8	755	766
14	22	P08603|CFAH_HUMAN	R.RNTEILTGSWSDQTYPEGTQAIYK.C	Y	69.01	2757.32	-0.3	920.115	3	47.64	F16:7405	2	28	51
14	22	P08603|CFAH_HUMAN	K.SIDVAC(+105.06)HPGYALPK.A	Y	67.75	1574.79	0.3	788.403	2	34.81	F17:4798	8	411	424	S-pyridylethylation
14	22	P08603|CFAH_HUMAN	K.TKEEYGHSEVVEYYC(+105.06)NPR.F	Y	64.32	2307.03	-4.7	770.013	3	31.65	F17:4223	8	645	662	S-pyridylethylation
14	22	P08603|CFAH_HUMAN	K.C(+105.06)FEGFGIDGPAIAK.C	Y	63.46	1528.74	1	765.377	2	46.79	F16:7242	5	959	972	S-pyridylethylation
14	22	P08603|CFAH_HUMAN	K.C(+105.06)LPVTAPENGK.I	Y	59.97	1232.62	-1	617.318	2	23.79	F18:2432	6	146	156	S-pyridylethylation
14	22	P08603|CFAH_HUMAN	K.NKKEFDHNSNIR.Y	Y	57.53	1500.74	1.2	751.38	2	8.51	F16:802	3	767	778
14	22	P08603|CFAH_HUMAN	K.EKTKEEYGHSEVVEYYC(+105.06)NPR.F	Y	54.74	2564.16	1.2	855.73	3	29.97	F16:3926	4	643	662	S-pyridylethylation
14	22	P08603|CFAH_HUMAN	R.EIMENYNIALR.W	N	54.54	1364.68	-0.6	683.345	2	46.5	F16:7188	2	1172	1182
14	22	P08603|CFAH_HUMAN	R.EC(+105.06)DTDGWTNDIPIC(+105.06)EVVK.C	Y	53.1	2246	-0.6	749.674	3	50.29	F16:7905	6	128	145	S-pyridylethylation
14	22	P08603|CFAH_HUMAN	K.DQYKVGEVLK.F	Y	52.11	1177.63	1.5	589.825	2	32.69	F16:4465	4	585	594
14	22	P08603|CFAH_HUMAN	R.EIM(+15.99)ENYNIALR.W	N	51.99	1380.67	-0.8	691.342	2	46.41	F16:7172	3	1172	1182	Oxidation (M)
14	22	P08603|CFAH_HUMAN	R.SLGNVIMVC(+105.06)R.K	Y	51.97	1195.62	0.6	598.818	2	40.12	F16:5950	3	58	67	S-pyridylethylation
14	22	P08603|CFAH_HUMAN	K.DGWSAQPTC(+105.06)IK.S	Y	51.7	1309.61	-1.2	655.813	2	31.47	F16:4214	4	497	507	S-pyridylethylation
14	22	P08603|CFAH_HUMAN	K.IDVHLVPDR.K	Y	51.05	1062.58	-1.7	532.297	2	36.27	F16:5178	4	574	582
14	22	P08603|CFAH_HUMAN	K.SC(+105.06)DIPVFM(+15.99)NAR.T	Y	50.91	1372.63	-1.4	687.32	2	42.93	F16:6504	3	508	518	S-pyridylethylation; Oxidation (M)
14	22	P08603|CFAH_HUMAN	K.LSYTC(+105.06)EGGFR.I	Y	49.36	1236.56	-0.9	619.287	2	31.89	F16:4304	3	897	906	S-pyridylethylation
14	22	P08603|CFAH_HUMAN	R.TGDEITYQC(+105.06)R.N	Y	49.28	1289.57	-3.4	645.791	2	24.03	F17:2881	9	286	295	S-pyridylethylation
14	22	P08603|CFAH_HUMAN	K.VSVLC(+105.06)QENYLIQEGEEITC(+105.06)KDGR.W	Y	49.26	2835.36	1.6	946.128	3	52.66	F16:8343	5	835	857	S-pyridylethylation
14	22	P08603|CFAH_HUMAN	K.FSC(+105.06)KPGFTIVGPNSVQC(+105.06)YHFGLSPDLPIC(+105.06)K.E	Y	47.8	3568.75	-1.7	893.193	4	53.11	F16:8427	1	595	624	S-pyridylethylation
14	22	P08603|CFAH_HUMAN	R.SLGNVIM(+15.99)VC(+105.06)R.K	Y	47.1	1211.62	0.3	606.815	2	40.15	F16:5956	4	58	67	Oxidation (M); S-pyridylethylation
14	22	P08603|CFAH_HUMAN	K.C(+105.06)TSTGWIPAPR.C	Y	46.07	1292.63	-0.5	647.324	2	35.08	F16:4932	8	309	319	S-pyridylethylation
14	22	P08603|CFAH_HUMAN	K.IVSSAMEPDREYHFGQAVR.F	Y	43.32	2191.05	-1.4	731.356	3	36.85	F16:5296	3	157	175
14	22	P08603|CFAH_HUMAN	R.KGEWVALNPLRK.C	Y	42.33	1409.81	-0.4	470.945	3	40.09	F16:5944	2	68	79
14	22	P08603|CFAH_HUMAN	R.TGESVEFVC(+105.06)K.R	Y	41.89	1202.56	-1	602.289	2	30.13	F16:3957	2	1193	1202	S-pyridylethylation
14	22	P08603|CFAH_HUMAN	R.RPYFPVAVGK.Y	N	40.14	1132.64	-2.2	567.326	2	37.08	F16:5344	1	342	351
14	22	P08603|CFAH_HUMAN	R.C(+105.06)TLKPC(+105.06)DYPDIK.H	Y	39.36	1604.77	-0.9	803.393	2	28.7	F16:3682	3	320	331	S-pyridylethylation
14	22	P08603|CFAH_HUMAN	K.C(+105.06)YFPYLENGYNQNYGR.K	N	35.85	2104.91	-1	702.643	3	47.24	F16:7330	1	389	404	S-pyridylethylation
14	22	P08603|CFAH_HUMAN	R.DGEKVSVLC(+105.06)QENYLIQEGEEITC(+105.06)KDGR.W	Y	34.57	3264.54	0.8	817.144	4	52.72	F16:8353	1	831	857	S-pyridylethylation
14	22	P08603|CFAH_HUMAN	K.VSVLC(+105.06)QENYLIQEGEEITC(+105.06)K.D	Y	33.94	2507.21	-0.4	627.809	4	54.08	F17:8090	7	835	854	S-pyridylethylation
14	22	P08603|CFAH_HUMAN	K.IIYKENERFQYK.C	Y	32.03	1629.85	-0.4	544.291	3	29.59	F16:3856	2	225	236
14	22	P08603|CFAH_HUMAN	K.C(+105.06)VEISC(+105.06)K.S	Y	31.46	990.467	0.3	331.163	3	16.05	F17:1578	2	205	211	S-pyridylethylation
14	22	P08603|CFAH_HUMAN	K.VGEVLK.F	Y	30.51	643.39	0	322.702	2	16.54	F16:1648	2	589	594
14	22	P08603|CFAH_HUMAN	R.EC(+105.06)ELPKIDVHLVPDRK.K	Y	30.23	1995.06	-1.2	499.772	4	41.18	F16:6159	2	568	583	S-pyridylethylation
14	22	P08603|CFAH_HUMAN	K.AVYTC(+105.06)NEGYQLLGEINYR.E	Y	29.61	2210.05	1.7	737.691	3	52.65	F19:5714	2	110	127	S-pyridylethylation
14	22	P08603|CFAH_HUMAN	K.WSHPPSC(+105.06)IK.T	Y	28.74	1158.56	-0.5	580.289	2	21.08	F16:2264	3	978	986	S-pyridylethylation
14	22	P08603|CFAH_HUMAN	K.AGEQVTYTC(+105.06)ATYYK.M	Y	28.17	1701.77	-0.6	568.264	3	32.38	F16:4401	1	1010	1023	S-pyridylethylation
14	22	P08603|CFAH_HUMAN	K.IIYKENER.F	Y	27.79	1063.57	-2	532.789	2	15.8	F17:1548	2	225	232
14	22	P08603|CFAH_HUMAN	R.FLM(+15.99)KGPNK.I	Y	27.36	949.505	-0.5	475.76	2	23.05	F16:2589	3	663	670	Oxidation (M)
14	22	P08603|CFAH_HUMAN	R.TGESVEFVC(+105.06)KR.G	Y	27.21	1358.67	-1	453.895	3	25.91	F16:3121	2	1193	1203	S-pyridylethylation
14	22	P08603|CFAH_HUMAN	R.WTAKQKLYSRTGESVEFVCK.R	Y	24.94	2359.2	-2.2	787.405	3	49.16	F18:6225	1	1183	1202
14	22	P08603|CFAH_HUMAN	K.TDC(+105.06)LSLPSFENAIPMGEKKDVYK.A	Y	24.6	2689.31	0.5	673.336	4	50.37	F16:7921	2	987	1009	S-pyridylethylation
14	22	P08603|CFAH_HUMAN	K.SC(+105.06)DNPYIPNGDYSPLR.I	Y	23.84	1914.86	-0.7	639.293	3	42.51	F16:6416	2	266	281	S-pyridylethylation
14	22	P08603|CFAH_HUMAN	K.IDVHLVPDRK.K	Y	23.41	1190.68	0	397.9	3	30.63	F16:4050	2	574	583
14	22	P08603|CFAH_HUMAN	R.C(+105.06)TLKPC(+105.06)DYPDIKHGGLYHENMR.R	Y	20.18	2799.31	-0.5	700.834	4	33.83	F16:4684	1	320	341	S-pyridylethylation
14	22	P08603|CFAH_HUMAN	K.HRTGDEITYQCRNGFYPATRGNTAK(+138.10).C	Y	16.86	2993.46	-1.8	749.37	4	42.17	F18:5248	1	284	308	SL-HNE+Delta H(2)O (K)
38	10	P35527|K1C9_HUMAN	R.GGSGGSYGGGGSGGGYGGGSGSR.G	Y	139.26	1790.72	-0.8	896.367	2	9.42	F19:802	6	491	513
38	10	P35527|K1C9_HUMAN	K.VQALEEANNDLENK.I	Y	108.02	1585.76	0	793.886	2	34.15	F19:3531	2	171	184
38	10	P35527|K1C9_HUMAN	R.FSSSSGYGGGSSR.V	Y	102.99	1234.52	-0.1	618.268	2	9.59	F20:788	8	47	59
38	10	P35527|K1C9_HUMAN	R.SGGGGGGGLGSGGSIR.S	Y	89.4	1231.59	-1.4	616.802	2	21.68	F19:1921	9	14	29
38	10	P35527|K1C9_HUMAN	K.IGLGGRGGSGGSYGR.G	Y	79.14	1349.68	-0.4	675.847	2	23.76	F19:2178	5	473	487
38	10	P35527|K1C9_HUMAN	K.DIENQYETQITQIEHEVSSSGQEVQSSAK.E	Y	76.72	3263.51	-1.5	1088.84	3	61.7	F19:6785	3	340	368
38	10	P35527|K1C9_HUMAN	K.EIETYHNLLEGGQEDFESSGAGK.I	Y	72	2509.12	-0.3	837.382	3	47.32	F19:5084	2	450	472
38	10	P35527|K1C9_HUMAN	K.STMQELNSR.L	Y	70.45	1064.49	-0.5	533.253	2	22.15	F18:2184	6	155	163
38	10	P35527|K1C9_HUMAN	K.TLLDIDNTR.M	Y	68.06	1059.56	-1.8	530.784	2	40.77	F20:3346	6	225	233
38	10	P35527|K1C9_HUMAN	K.TLNDMRQEYEQLIAK.N	Y	65.72	1850.92	-0.4	617.98	3	52.19	F19:5660	9	322	336
38	10	P35527|K1C9_HUMAN	R.HGVQELEIELQSQLSKK.A	Y	64.48	1965.05	-1.1	656.024	3	52.09	F19:5650	1	375	391
38	10	P35527|K1C9_HUMAN	R.QGVDADINGLR.Q	Y	56.86	1156.58	0.5	579.299	2	35.9	F19:3742	3	251	261
38	10	P35527|K1C9_HUMAN	K.NYSPYYNTIDDLKDQIVDLTVGNNK.T	Y	54.93	2901.4	2.3	968.144	3	70.89	F17:10645	4	200	224
38	10	P35527|K1C9_HUMAN	K.STM(+15.99)QELNSR.L	Y	54.02	1080.49	-0.1	541.251	2	23.22	F17:2731	2	155	163	Oxidation (M)
38	10	P35527|K1C9_HUMAN	R.QEYEQLIAK.N	Y	53.59	1120.58	0.2	561.296	2	35.26	F19:3660	1	328	336
38	10	P35527|K1C9_HUMAN	R.IKFEMEQNLR.Q	Y	51.49	1306.67	-0.6	654.342	2	39.24	F19:4147	2	241	250
38	10	P35527|K1C9_HUMAN	K.TLNDM(+15.99)RQEYEQLIAK.N	Y	45.23	1866.91	-0.5	934.464	2	52.23	F19:5666	9	322	336	Oxidation (M)
38	10	P35527|K1C9_HUMAN	R.IKFEM(+15.99)EQNLR.Q	Y	40.7	1322.67	0.6	662.34	2	39.32	F19:4158	4	241	250	Oxidation (M)
38	10	P35527|K1C9_HUMAN	R.FSSSGGGGGGGR.F	Y	34.19	981.426	2.6	491.722	2	9.05	F19:749	2	35	46
38	10	P35527|K1C9_HUMAN	R.M(+15.99)TLDDFR.I	Y	32.41	912.401	0.6	457.208	2	42.4	F19:4522	2	234	240	Oxidation (M)
38	10	P35527|K1C9_HUMAN	K.IGLGGR.G	Y	28.61	571.344	0.5	286.68	2	21.19	F19:1859	5	473	478
38	10	P35527|K1C9_HUMAN	R.LASYLDK.V	N	20.97	808.433	0.5	405.224	2	27.76	F19:2697	2	164	170
10	57	P01877|IGHA2_HUMAN	R.QEPSQGTTTFAVTSILR.V	N	141.16	1834.94	0.3	918.479	2	55.07	F19:6008	77	270	286
10	57	P01877|IGHA2_HUMAN	K.KGDTFSC(+105.06)MVGHEALPLAFTQK.T	N	95.11	2384.17	1	1193.09	2	48.68	F17:7224	8	294	314	S-pyridylethylation
10	57	P01877|IGHA2_HUMAN	K.YLTWASRQEPSQGTTTFAVTSILR.V	N	85.43	2712.39	1.1	905.137	3	58.6	F18:7499	4	263	286
10	57	P01877|IGHA2_HUMAN	R.WLQGSQELPREK.Y	N	81.01	1469.76	-1.7	735.887	2	32.51	F18:3789	4	251	262
10	57	P01877|IGHA2_HUMAN	K.KGDTFSC(+105.06)M(+15.99)VGHEALPLAFTQK.T	N	78.62	2400.16	0.8	1201.09	2	48.68	F17:7225	16	294	314	S-pyridylethylation; Oxidation (M)
10	57	P01877|IGHA2_HUMAN	K.GDTFSC(+105.06)MVGHEALPLAFTQK.T	N	76.73	2256.07	0.7	1129.04	2	52.45	F17:7833	8	295	314	S-pyridylethylation
10	57	P01877|IGHA2_HUMAN	K.SGNTFRPEVHLLPPPSEELALNELVTLTC(+105.06)LAR.G	N	72.56	3620.9	-0.1	906.233	4	73.23	F19:8009	54	209	240	S-pyridylethylation
10	57	P01877|IGHA2_HUMAN	R.WLQGSQELPR.E	N	68.92	1212.63	0.1	607.32	2	38.44	F18:4694	6	251	260
10	57	P01877|IGHA2_HUMAN	R.NFPPSQDASGDLYTTSSQLTLPATQC(+105.06)PDGK.S	Y	67.57	3243.5	0.8	1082.18	3	48.43	F17:7182	16	52	81	S-pyridylethylation
10	57	P01877|IGHA2_HUMAN	R.VAAEDWKKGDTFSC(+105.06)MVGHEALPLAFTQK.T	N	66.24	3183.55	0.8	1062.19	3	51.38	F17:7657	10	287	314	S-pyridylethylation
10	57	P01877|IGHA2_HUMAN	R.DASGATFTWTPSSGK.S	Y	65.33	1511.69	-0.6	756.851	2	43.12	F17:6298	4	141	155
10	57	P01877|IGHA2_HUMAN	R.GFSPKDVLVR.W	N	64.64	1116.63	-0.5	559.322	2	39.8	F17:5701	8	241	250
10	57	P01877|IGHA2_HUMAN	K.GDTFSC(+105.06)M(+15.99)VGHEALPLAFTQK.T	N	63.65	2272.07	0.9	758.363	3	52.29	F17:7806	3	295	314	S-pyridylethylation; Oxidation (M)
10	57	P01877|IGHA2_HUMAN	K.SAVQGPPER.D	N	54.93	939.477	-0.2	470.746	2	9.68	F17:987	8	156	164
10	57	P01877|IGHA2_HUMAN	K.YLTWASR.Q	N	54.48	895.455	-0.5	448.735	2	37.72	F18:4581	8	263	269
10	57	P01877|IGHA2_HUMAN	K.HYTNPSQDVTVPC(+105.06)PVPPPPPC(+105.06)C(+105.06)HPR.L	Y	51.72	3052.43	-0.1	764.115	4	34.72	F16:4858	2	89	113	S-pyridylethylation
10	57	P01877|IGHA2_HUMAN	R.VAAEDWKKGDTFSC(+105.06)M(+15.99)VGHEALPLAFTQK.T	N	47.65	3199.55	-0.9	1067.52	3	51.49	F17:7675	5	287	314	S-pyridylethylation; Oxidation (M)
10	57	P01877|IGHA2_HUMAN	R.VAAEDWKK.G	N	47.5	945.492	-0.8	473.753	2	18.83	F17:1986	4	287	294
10	57	P01877|IGHA2_HUMAN	R.VAAEDWK.K	N	45.58	817.397	0	409.706	2	24.57	F17:2982	4	287	293
10	57	P01877|IGHA2_HUMAN	K.DVLVR.W	N	33.5	600.36	0.9	301.187	2	21.32	F16:2304	3	246	250
10	57	P01877|IGHA2_HUMAN	R.EKYLTWASR.Q	N	25.51	1152.59	1	385.205	3	35.99	F17:5003	2	261	269
10	57	P01877|IGHA2_HUMAN	K.SVTC(+105.06)HVK.H	N	19.87	877.448	0.4	439.731	2	8.2	F16:756	6	82	88	S-pyridylethylation
9	41	P00739|HPTR_HUMAN	R.LRTEGDGVYTLNDK.K	N	101.02	1579.78	0.9	790.9	2	30.85	F19:3108	11	59	72
9	41	P00739|HPTR_HUMAN	K.AVGDKLPEC(+105.06)EAVC(+105.06)GKPK.N	N	97.86	1952.99	0.4	977.5	2	25.47	F18:2688	27	79	95	S-pyridylethylation
9	41	P00739|HPTR_HUMAN	R.TEGDGVYTLNDK.K	N	97.14	1310.6	0.5	656.307	2	30.42	F18:3464	4	61	72
9	41	P00739|HPTR_HUMAN	R.LRTEGDGVYTLNDKK.Q	N	94.4	1707.88	0.8	570.301	3	28.8	F19:2835	25	59	73
9	41	P00739|HPTR_HUMAN	K.SC(+105.06)AVAEYGVYVK.V	N	89.8	1392.67	2.1	697.346	2	37.65	F19:3958	100	322	333	S-pyridylethylation
9	41	P00739|HPTR_HUMAN	R.TEGDGVYTLNDKK.Q	N	85.68	1438.69	0	720.354	2	24.71	F18:2573	12	61	73
9	41	P00739|HPTR_HUMAN	R.LRTEGDGVYTLNDKKQWINK.A	N	78.37	2377.24	0.4	793.421	3	34.18	F18:4048	21	59	78
9	41	P00739|HPTR_HUMAN	R.TEGDGVYTLNDKKQWINK.A	N	77.41	2108.05	0.5	1055.03	2	35.3	F18:4215	7	61	78
9	41	P00739|HPTR_HUMAN	K.DIAPTLTLYVGK.K	N	76.28	1289.72	-0.1	645.869	2	54.38	F17:8137	2	158	169
9	41	P00739|HPTR_HUMAN	K.DIAPTLTLYVGKK.Q	N	73.04	1417.82	-0.1	709.916	2	47.74	F17:7056	12	158	170
9	41	P00739|HPTR_HUMAN	R.ILGGHLDAKGSFPWQAK.M	N	62.96	1823.97	-1.1	608.996	3	45.83	F17:6753	4	104	120
9	41	P00739|HPTR_HUMAN	K.SPVGVQPILNEHTFC(+105.06)VGM(+15.99)SK.Y	Y	61.18	2263.11	-1	755.378	3	47.79	F17:7065	1	268	287	S-pyridylethylation; Oxidation (M)
9	41	P00739|HPTR_HUMAN	K.GSFPWQAK.M	N	54.05	919.455	-1.1	460.734	2	42.27	F18:5263	6	113	120
9	41	P00739|HPTR_HUMAN	R.ILGGHLDAK.G	N	49.51	922.524	-0.1	462.269	2	23.76	F17:2824	18	104	112
9	41	P00739|HPTR_HUMAN	R.VM(+15.99)PIC(+105.06)LPSK.N	N	45.83	1107.58	-0.2	554.798	2	37.24	F17:5230	3	204	212	Oxidation (M); S-pyridylethylation
9	41	P00739|HPTR_HUMAN	M.SDLGAVISLLLWGR.Q	Y	39.44	1498.85	0.8	750.433	2	91.14	F19:9497	2	2	15
9	41	P00739|HPTR_HUMAN	R.VMPIC(+105.06)LPSK.N	N	38.67	1091.59	-1.1	546.8	2	37.3	F17:5241	4	204	212	S-pyridylethylation
9	41	P00739|HPTR_HUMAN	R.VM(+15.99)PIC(+105.06)LPSKNYAEVGR.V	Y	37.38	1896.96	-1.6	475.246	4	40.38	F17:5805	4	204	219	Oxidation (M); S-pyridylethylation
9	41	P00739|HPTR_HUMAN	K.QWINK.A	N	37.05	687.37	0.2	344.693	2	22.1	F18:2175	5	74	78
9	41	P00739|HPTR_HUMAN	K.LPEC(+105.06)EAVC(+105.06)GKPK.N	N	35.62	1482.74	1.5	742.377	2	18.84	F18:1725	4	84	95	S-pyridylethylation
9	41	P00739|HPTR_HUMAN	K.QLVEIEK.V	N	34.66	857.486	-0.5	429.75	2	30.32	F17:3985	4	171	177
9	41	P00739|HPTR_HUMAN	K.YVMLPVADQYDC(+105.06)ITHYEGSTC(+105.06)PK.W	Y	33.54	2842.28	0.5	948.435	3	47.95	F17:7094	2	240	262	S-pyridylethylation
9	41	P00739|HPTR_HUMAN	K.KQLVEIEK.V	N	31.16	985.581	-3.4	493.796	2	24.19	F17:2913	4	170	177
9	41	P00739|HPTR_HUMAN	K.YVM(+15.99)LPVADQYDC(+105.06)ITHYEGSTC(+105.06)PK.W	Y	31.11	2858.28	-0.1	715.576	4	47.82	F17:7069	4	240	262	Oxidation (M); S-pyridylethylation
9	41	P00739|HPTR_HUMAN	K.AVGDKLPEC(+105.06)EAVC(+105.06)GKPKNPANPVQR.I	N	29.66	2829.44	-1.8	708.366	4	30.9	F19:3115	1	79	103	S-pyridylethylation
9	41	P00739|HPTR_HUMAN	K.KQWINK.A	N	26.46	815.465	0.3	408.74	2	15.71	F19:1290	6	73	78
9	41	P00739|HPTR_HUMAN	K.LPECEAVCGKPK.N	N	25.42	1272.62	-1.2	637.317	2	34.32	F20:2828	1	84	95
9	41	P00739|HPTR_HUMAN	K.VTSIQH(+138.10)WVQK.T	Y	20.42	1362.77	-2.3	455.262	3	24.76	F19:2305	1	334	343	SL-HNE+Delta H(2)O (H)
17	11	Q14624|ITIH4_HUMAN	K.AEAQAQYSAAVAK.G	Y	102.34	1306.65	1.5	654.334	2	23.96	F19:2204	8	99	111
17	11	Q14624|ITIH4_HUMAN	K.LQDRGPDVLTATVSGK.L	Y	101.53	1655.88	-1.2	828.948	2	36.92	F18:4463	5	497	512
17	11	Q14624|ITIH4_HUMAN	K.SPEQQETVLDGNLIIR.Y	Y	95.77	1810.94	-1.3	906.477	2	51.47	F19:5571	14	225	240
17	11	Q14624|ITIH4_HUMAN	R.ANTVQEATFQMELPK.K	Y	76.37	1705.83	0.2	853.925	2	49.99	F17:7436	5	61	75
17	11	Q14624|ITIH4_HUMAN	R.LWAYLTIQQLLEQTVSASDADQQALR.N	Y	75.76	2960.52	-0.4	987.848	3	84.84	F18:10214	7	547	572
17	11	Q14624|ITIH4_HUMAN	K.NVVFVIDKSGSM(+15.99)SGR.K	Y	75.42	1610.81	-0.9	806.411	2	40.87	F16:6093	2	274	288	Oxidation (M)
17	11	Q14624|ITIH4_HUMAN	R.GPDVLTATVSGK.L	Y	73.25	1143.61	-0.2	572.814	2	36.38	F18:4384	2	501	512
17	11	Q14624|ITIH4_HUMAN	K.ITFELVYEELLK.R	Y	72.83	1495.82	-0.2	748.916	2	110.77	F17:14997	7	140	151
17	11	Q14624|ITIH4_HUMAN	K.NVVFVIDKSGSMSGR.K	Y	71.7	1594.81	-0.7	798.414	2	40.91	F16:6100	1	274	288
17	11	Q14624|ITIH4_HUMAN	K.YIFHNFMER.L	Y	71.26	1255.58	-0.3	628.798	2	45.21	F18:5682	8	538	546
17	11	Q14624|ITIH4_HUMAN	R.DQFNLIVFSTEATQWRPSLVPASAENVNK.A	Y	66.64	3260.65	1.7	1087.89	3	71.54	F17:10734	3	308	336
17	11	Q14624|ITIH4_HUMAN	K.YIFHNFM(+15.99)ER.L	Y	62.55	1271.58	0	636.795	2	45.13	F18:5669	8	538	546	Oxidation (M)
17	11	Q14624|ITIH4_HUMAN	R.FAHTVVTSR.V	Y	58.71	1016.54	-1.6	509.277	2	19.75	F17:2131	8	48	56
17	11	Q14624|ITIH4_HUMAN	K.ILDDLSPRDQFNLIVFSTEATQWRPSLVPASAENVNK.A	Y	56.45	4170.14	-2.9	1391.05	3	72	F17:10798	5	300	336
17	11	Q14624|ITIH4_HUMAN	K.LALDNGGLAR.R	Y	54.41	998.551	-1.1	500.282	2	35.19	F17:4861	2	429	438
17	11	Q14624|ITIH4_HUMAN	K.IPKPEASFSPR.R	Y	54.25	1227.66	1.2	410.228	3	30.31	F16:3990	3	634	644
17	11	Q14624|ITIH4_HUMAN	R.LGVYELLLK.V	Y	53.85	1046.64	-0.1	524.326	2	60.5	F17:9126	2	154	162
17	11	Q14624|ITIH4_HUMAN	R.RIHEDSDSALQLQDFYQEVANPLLTAVTFEYPSNAVEEVTQNNFR.L	Y	52.76	5197.49	1.3	1300.38	4	79.36	F16:12538	4	439	483
17	11	Q14624|ITIH4_HUMAN	R.IHEDSDSALQLQDFYQEVANPLLTAVTFEYPSNAVEEVTQNNFR.L	Y	47.42	5041.39	3.2	1261.36	4	82.67	F16:12964	3	440	483
17	11	Q14624|ITIH4_HUMAN	R.M(+15.99)NFRPGVLSSR.Q	Y	46.19	1278.65	-0.4	427.224	3	36.57	F18:4412	5	658	668	Oxidation (M)
17	11	Q14624|ITIH4_HUMAN	R.FKPTLSQQQK.S	Y	44.76	1203.66	0.2	602.838	2	18.52	F16:1886	18	215	224
17	11	Q14624|ITIH4_HUMAN	R.AISGGSIQIENGYFVHYFAPEGLTTMPK.N	Y	44.32	3026.48	0.7	1009.84	3	64.13	F19:7064	3	246	273
17	11	Q14624|ITIH4_HUMAN	K.ILDDLSPR.D	Y	42.11	927.503	-1.1	464.758	2	35.94	F16:5113	2	300	307
17	11	Q14624|ITIH4_HUMAN	K.NVVFVIDK.S	Y	40.58	932.533	-2.4	467.273	2	43.1	F16:6537	2	274	281
17	11	Q14624|ITIH4_HUMAN	R.ANTVQEATFQM(+15.99)ELPK.K	Y	37.1	1721.83	0.6	861.923	2	49.96	F17:7432	2	61	75	Oxidation (M)
17	11	Q14624|ITIH4_HUMAN	K.VRPQQLVK.H	Y	36.66	966.597	0.5	323.207	3	20.88	F17:2324	4	163	170
17	11	Q14624|ITIH4_HUMAN	R.KIQQTR.E	Y	32.92	772.456	1	387.235	2	4.77	F17:393	3	289	294
17	11	Q14624|ITIH4_HUMAN	R.RLDYQEGPPGVEISC(+105.06)WSVEL	Y	30.73	2381.14	-0.4	794.719	3	60.84	F17:9176	1	911	930	S-pyridylethylation
17	11	Q14624|ITIH4_HUMAN	K.ITFELVYEELLKR.R	Y	24.56	1651.92	-0.8	551.646	3	68.62	F17:10328	3	140	152
17	11	Q14624|ITIH4_HUMAN	K.L(+138.10)ALDNGGLAR.R	Y	23.92	1136.66	-2.5	569.333	2	55.53	F20:4650	2	429	438	SLHNE+Delta H(2)O (AL)
17	11	Q14624|ITIH4_HUMAN	K.IQQTR.E	Y	22.31	644.361	1.2	323.188	2	5.61	F17:490	1	290	294
29	83	P0CG05|LAC2_HUMAN	K.QSNNKYAASSYLSLTPEQWK.S	N	119.69	2314.12	1.3	1158.07	2	49.87	F18:6325	15	61	80
29	83	P0CG05|LAC2_HUMAN	K.YAASSYLSLTPEQWK.S	N	111.04	1742.85	0.1	872.433	2	55.01	F19:6001	10	66	80
29	83	P0CG05|LAC2_HUMAN	R.SYSC(+105.06)QVTHEGSTVEKTVAPTEC(+105.06)S	N	101.14	2652.18	-0.4	1327.1	2	28.86	F18:3204	14	84	106	S-pyridylethylation
29	83	P0CG05|LAC2_HUMAN	K.AGVETTTPSKQSNNKYAASSYLSLTPEQWK.S	N	99.54	3285.62	-0.1	1096.21	3	47.11	F18:5942	3	51	80
29	83	P0CG05|LAC2_HUMAN	K.ADSSPVKAGVETTTPSK.Q	Y	95.46	1673.85	-0.9	837.93	2	22.74	F18:2272	16	44	60
29	83	P0CG05|LAC2_HUMAN	K.AAPSVTLFPPSSEELQANK.A	N	86.98	1985.01	0.5	993.513	2	51.81	F18:6591	7	5	23
29	83	P0CG05|LAC2_HUMAN	R.SYSC(+105.06)QVTHEGSTVEK.T	N	79.68	1758.79	0.4	880.402	2	9.43	F18:879	27	84	98	S-pyridylethylation
29	83	P0CG05|LAC2_HUMAN	K.YAASSYLSLTPEQWKSHR.S	N	66.18	2123.04	0.1	708.688	3	45.81	F18:5763	4	66	83
29	83	P0CG05|LAC2_HUMAN	R.SYSCQVTHEGSTVEKTVAPTEC(+105.06)S	N	66.1	2547.13	3.5	850.052	3	33.38	F18:3924	1	84	106	S-pyridylethylation
29	83	P0CG05|LAC2_HUMAN	K.ADSSPVKAGVETTTPSKQSNNK.Y	Y	63.72	2245.12	0.4	749.38	3	18.93	F18:1737	2	44	65
29	83	P0CG05|LAC2_HUMAN	K.SHRSYSC(+105.06)QVTHEGSTVEK.T	N	47.15	2138.98	0.4	714.001	3	17.8	F18:1611	3	81	98	S-pyridylethylation
29	83	P0CG05|LAC2_HUMAN	K.SHRSYSC(+105.06)QVTHEGSTVEKTVAPTEC(+105.06)S	N	43.07	3032.38	-2	759.1	4	28.11	F18:3084	2	81	106	S-pyridylethylation
29	83	P0CG05|LAC2_HUMAN	K.ADSSPVK.A	Y	42.56	702.355	0.9	352.185	2	8.85	F18:775	4	44	50
29	83	P0CG05|LAC2_HUMAN	K.TVAPTEC(+105.06)S	N	39.68	911.406	-0.8	456.71	2	9.45	F18:883	7	99	106	S-pyridylethylation
29	83	P0CG05|LAC2_HUMAN	K.AGVETTTPSK.Q	N	34.66	989.503	1	495.759	2	15.23	F18:1354	2	51	60
42	24	P10909|CLUS_HUMAN	R.VTTVASHTSDSDVPSGVTEVVVK.L	Y	122.29	2313.17	0.1	1157.59	2	38.71	F17:5504	4	386	408
42	24	P10909|CLUS_HUMAN	K.LFDSDPITVTVPVEVSR.K	Y	108.31	1872.98	0.1	937.499	2	57.56	F18:7364	8	409	425
42	24	P10909|CLUS_HUMAN	K.FMETVAEKALQEYR.K	Y	106.57	1713.84	-0.8	857.926	2	49.59	F18:6286	5	430	443
42	24	P10909|CLUS_HUMAN	R.EILSVDC(+105.06)STNNPSQAK.L	Y	80.82	1809.86	2.9	905.938	2	30.76	F17:4067	3	307	322	S-pyridylethylation
42	24	P10909|CLUS_HUMAN	R.ELDESLQVAER.L	Y	78.89	1287.63	0.4	644.823	2	35.73	F19:3720	21	326	336
42	24	P10909|CLUS_HUMAN	K.FM(+15.99)ETVAEKALQEYR.K	Y	78.8	1729.83	-4.7	865.92	2	49.73	F18:6306	8	430	443	Oxidation (M)
42	24	P10909|CLUS_HUMAN	R.ASSIIDELFQDR.F	Y	68.96	1392.69	-0.2	697.351	2	65.11	F17:9824	2	183	194
42	24	P10909|CLUS_HUMAN	K.TLLSNLEEAK.K	Y	65.11	1116.6	-1.1	559.308	2	47.55	F17:7026	2	69	78
42	24	P10909|CLUS_HUMAN	K.TLIEKTNEER.K	Y	59.68	1231.64	-0.9	616.827	2	18.25	F17:1901	4	58	67
42	24	P10909|CLUS_HUMAN	R.KTLLSNLEEAKK.K	Y	56.06	1372.79	-1.2	687.403	2	33.99	F17:4664	4	68	79
42	24	P10909|CLUS_HUMAN	R.KTLLSNLEEAK.K	Y	53.24	1244.7	-1	623.356	2	39.46	F17:5636	3	68	78
42	24	P10909|CLUS_HUMAN	K.FMETVAEK.A	Y	47.45	953.453	-0.6	477.733	2	27.7	F17:3505	4	430	437
42	24	P10909|CLUS_HUMAN	K.C(+105.06)REILSVDC(+105.06)STNNPSQAK.L	Y	47.18	2174.02	-0.7	725.682	3	27.26	F17:3430	2	305	322	S-pyridylethylation
42	24	P10909|CLUS_HUMAN	K.FM(+15.99)ETVAEK.A	Y	44.03	969.448	-0.4	485.731	2	21.43	F17:2416	6	430	437	Oxidation (M)
42	24	P10909|CLUS_HUMAN	K.TLIEKTNEERKTLLSNLEEAKK.K	Y	39.88	2586.42	-1.2	863.147	3	46.23	F17:6814	2	58	79
42	24	P10909|CLUS_HUMAN	R.KYNELLK.S	Y	34.75	906.518	-0.3	454.266	2	23.72	F18:2422	5	340	346
42	24	P10909|CLUS_HUMAN	K.ALQEYR.K	Y	34.44	778.397	0.4	390.206	2	19.33	F17:2062	1	438	443
42	24	P10909|CLUS_HUMAN	R.ELDESLQVAERLTR.K	Y	29.34	1657.86	0.7	829.94	2	47.89	F18:6049	1	326	339
42	24	P10909|CLUS_HUMAN	K.SYQWK.M	Y	27.42	710.339	0.3	356.177	2	25.3	F17:3098	2	347	351
42	24	P10909|CLUS_HUMAN	R.VTTVASHTSDSDVPSGVTEVVVKLFDSDPITVTVPVEVSR.K	Y	21.32	4168.14	1.8	1043.04	4	75.48	F17:11229	2	386	425
27	12	P19823|ITIH2_HUMAN	K.VVNNSPQPQNVVFDVQIPK.G	Y	110.55	2121.12	0.4	1061.57	2	54.27	F18:6918	10	94	112
27	12	P19823|ITIH2_HUMAN	K.NILFVIDVSGSMWGVK.M	Y	99.01	1763.93	1.1	882.972	2	110.92	F19:11296	7	310	325
27	12	P19823|ITIH2_HUMAN	R.SILQMSLDHHIVTPLTSLVIENEAGDER.M	Y	89.44	3116.58	1.2	1039.87	3	64.68	F17:9758	7	611	638
27	12	P19823|ITIH2_HUMAN	K.TILDDLRAEDHFSVIDFNQNIR.T	Y	81.5	2630.31	0.8	877.778	3	64.58	F17:9743	5	335	356
27	12	P19823|ITIH2_HUMAN	K.FYNQVSTPLLR.N	Y	71.84	1336.71	-0.2	669.364	2	46.35	F17:6835	4	489	499
27	12	P19823|ITIH2_HUMAN	K.AHVSFKPTVAQQR.I	Y	69.47	1467.79	-1.3	734.904	2	22.59	F16:2508	6	247	259
27	12	P19823|ITIH2_HUMAN	K.IQPSGGTNINEALLR.A	Y	68.99	1581.85	0.1	791.931	2	42.38	F17:6158	4	380	394
27	12	P19823|ITIH2_HUMAN	R.FLHVPDTFEGHFDGVPVISK.G	Y	68.52	2240.13	0.3	1121.07	2	55.08	F16:8782	8	223	242
27	12	P19823|ITIH2_HUMAN	R.IYGNQDTSSQLKK.F	Y	67.56	1480.75	-1.2	741.383	2	20.11	F17:2192	7	476	488
27	12	P19823|ITIH2_HUMAN	R.SSALDMENFRTEVNVLPGAK.V	Y	63.03	2177.08	-0.5	726.7	3	52.64	F16:8340	2	157	176
27	12	P19823|ITIH2_HUMAN	K.KFYNQVSTPLLR.N	Y	59.06	1464.81	2.7	733.414	2	41.16	F16:6154	3	488	499
27	12	P19823|ITIH2_HUMAN	R.SSALDM(+15.99)ENFR.T	Y	57.46	1184.51	-0.1	593.264	2	42.04	F17:6100	2	157	166	Oxidation (M)
27	12	P19823|ITIH2_HUMAN	R.YIEKIQPSGGTNINEALLR.A	Y	55.7	2115.13	-0.5	706.051	3	44.17	F16:6744	2	376	394
27	12	P19823|ITIH2_HUMAN	R.KLWAYLTINQLLAER.S	Y	55.33	1831.04	1.6	916.527	2	66.71	F16:10718	4	582	596
27	12	P19823|ITIH2_HUMAN	R.FLHVPDTFEGHFDGVPVISKGQQK.A	Y	54.5	2681.36	-0.1	671.347	4	50.69	F16:7980	2	223	246
27	12	P19823|ITIH2_HUMAN	R.SSALDMENFR.T	Y	53.71	1168.52	-1.3	585.266	2	41.66	F16:6253	3	157	166
27	12	P19823|ITIH2_HUMAN	R.TEVNVLPGAK.V	Y	49.98	1026.57	-0.7	514.292	2	32.8	F17:4438	4	167	176
27	12	P19823|ITIH2_HUMAN	R.NDLISATK.T	Y	46.26	860.46	-0.4	431.237	2	24.8	F16:2914	1	360	367
27	12	P19823|ITIH2_HUMAN	R.MLADAPPQDPSC(+105.06)C(+105.06)SGALYYGSK.V	Y	43.64	2483.1	0.6	828.706	3	36.49	F16:5222	3	639	660	S-pyridylethylation
27	12	P19823|ITIH2_HUMAN	R.MATTM(+15.99)IQSK.V	Y	43.01	1025.49	1.5	513.752	2	25.36	F16:3023	2	85	93	Oxidation (M)
27	12	P19823|ITIH2_HUMAN	K.HLEVDVWVIEPQGLR.F	Y	38.79	1788.95	-1.4	597.324	3	58.94	F17:8884	3	208	222
27	12	P19823|ITIH2_HUMAN	R.IYLQPGR.L	Y	37.54	845.476	0.5	423.745	2	28.02	F16:3541	2	198	204
27	12	P19823|ITIH2_HUMAN	R.LSNENHGIAQR.I	Y	34.36	1237.62	-1.3	619.815	2	15.7	F16:1551	2	465	475
27	12	P19823|ITIH2_HUMAN	R.MATTMIQSK.V	Y	32.39	1009.49	0.5	505.754	2	25.26	F16:3004	2	85	93
27	12	P19823|ITIH2_HUMAN	K.VQFELHYQEVK.W	Y	30.21	1418.72	-0.1	473.914	3	40.26	F16:5978	2	177	187
27	12	P19823|ITIH2_HUMAN	R.M(+15.99)LADAPPQDPSC(+105.06)C(+105.06)SGALYYGSK.V	Y	27.37	2499.09	-0.4	834.037	3	36.52	F16:5227	4	639	660	Oxidation (M); S-pyridylethylation
27	12	P19823|ITIH2_HUMAN	R.M(+15.99)ATTM(+15.99)IQSK.V	Y	22.14	1041.48	1.5	521.75	2	25.36	F16:3022	2	85	93	Oxidation (M)
27	12	P19823|ITIH2_HUMAN	R.AIFILNEANNLGLLDPNSVSLIILVSDGDPTVGELK.L	Y	20.69	3763.03	-4.5	1255.34	3	98.59	F17:13923	4	395	430
36	85	P0CG06|LAC3_HUMAN	K.QSNNKYAASSYLSLTPEQWK.S	N	119.69	2314.12	1.3	1158.07	2	49.87	F18:6325	15	61	80
36	85	P0CG06|LAC3_HUMAN	K.YAASSYLSLTPEQWK.S	N	111.04	1742.85	0.1	872.433	2	55.01	F19:6001	10	66	80
36	85	P0CG06|LAC3_HUMAN	K.SYSC(+105.06)QVTHEGSTVEKTVAPTEC(+105.06)S	N	101.14	2652.18	-0.4	1327.1	2	28.86	F18:3204	14	84	106	S-pyridylethylation
36	85	P0CG06|LAC3_HUMAN	K.AGVETTTPSKQSNNKYAASSYLSLTPEQWK.S	N	99.54	3285.62	-0.1	1096.21	3	47.11	F18:5942	3	51	80
36	85	P0CG06|LAC3_HUMAN	K.SHKSYSC(+105.06)QVTHEGSTVEKTVAPTEC(+105.06)S	Y	87.53	3004.37	-1.3	1002.46	3	28.06	F18:3074	4	81	106	S-pyridylethylation
36	85	P0CG06|LAC3_HUMAN	K.AAPSVTLFPPSSEELQANK.A	N	86.98	1985.01	0.5	993.513	2	51.81	F18:6591	7	5	23
36	85	P0CG06|LAC3_HUMAN	K.SYSC(+105.06)QVTHEGSTVEK.T	N	79.68	1758.79	0.4	880.402	2	9.43	F18:879	27	84	98	S-pyridylethylation
36	85	P0CG06|LAC3_HUMAN	K.SHKSYSC(+105.06)QVTHEGSTVEK.T	Y	69.02	2110.97	0.6	704.666	3	9.3	F18:854	13	81	98	S-pyridylethylation
36	85	P0CG06|LAC3_HUMAN	K.SYSCQVTHEGSTVEKTVAPTEC(+105.06)S	N	66.1	2547.13	3.5	850.052	3	33.38	F18:3924	1	84	106	S-pyridylethylation
36	85	P0CG06|LAC3_HUMAN	K.TVAPTEC(+105.06)S	N	39.68	911.406	-0.8	456.71	2	9.45	F18:883	7	99	106	S-pyridylethylation
36	85	P0CG06|LAC3_HUMAN	K.YAASSYLSLTPEQWKSHK.S	Y	35.57	2095.04	-0.6	699.353	3	45.44	F18:5714	2	66	83
36	85	P0CG06|LAC3_HUMAN	K.AGVETTTPSK.Q	N	34.66	989.503	1	495.759	2	15.23	F18:1354	2	51	60
32	17	P00450|CERU_HUMAN	R.GVYSSDVFDIFPGTYQTLEMFPR.T	Y	108.91	2668.25	-1.9	1335.13	2	77.6	F18:9604	5	1009	1031
32	17	P00450|CERU_HUMAN	K.ERGPEEEHLGILGPVIWAEVGDTIR.V	Y	77.98	2771.42	1.1	924.816	3	67.48	F16:10841	3	438	462
32	17	P00450|CERU_HUMAN	R.FNKNNEGTYYSPNYNPQSR.S	Y	76.29	2292.02	1.5	1147.02	2	30.81	F16:4083	4	482	500
32	17	P00450|CERU_HUMAN	K.MYYSAVDPTKDIFTGLIGPMK.I	Y	73.87	2346.16	0.5	1174.09	2	64.83	F16:10432	6	538	558
32	17	P00450|CERU_HUMAN	K.NNEGTYYSPNYNPQSR.S	Y	71.61	1902.81	-1.1	952.413	2	32.04	F16:4334	2	485	500
32	17	P00450|CERU_HUMAN	R.ADDKVYPGEQYTYMLLATEEQSPGEGDGNC(+105.06)VTR.I	Y	69.06	3740.66	-0.9	1247.89	3	56.09	F16:8958	4	145	177	S-pyridylethylation
32	17	P00450|CERU_HUMAN	K.M(+15.99)YYSAVDPTKDIFTGLIGPMK.I	Y	67.38	2362.16	0.5	788.394	3	63.41	F16:10208	3	538	558	Oxidation (M)
32	17	P00450|CERU_HUMAN	R.SVPPSASHVAPTETFTYEWTVPK.E	Y	65.65	2530.24	0.1	1266.13	2	51.09	F16:8056	4	501	523
32	17	P00450|CERU_HUMAN	R.KAEEEHLGILGPQLHADVGDKVK.I	Y	61.77	2482.32	-1.1	828.446	3	38	F16:5524	4	799	821
32	17	P00450|CERU_HUMAN	K.DVDKEFYLFPTVFDENESLLLEDNIR.M	Y	60.62	3159.53	2.2	1054.19	3	76.28	F17:11327	4	573	598
32	17	P00450|CERU_HUMAN	R.QKDVDKEFYLFPTVFDENESLLLEDNIR.M	Y	57.86	3415.68	1.3	1139.57	3	69.42	F16:11140	7	571	598
32	17	P00450|CERU_HUMAN	K.GAYPLSIEPIGVR.F	Y	57.69	1370.76	-1.3	686.384	2	52.05	F16:8237	3	469	481
32	17	P00450|CERU_HUMAN	R.VTFHNKGAYPLSIEPIGVR.F	Y	57.52	2097.14	-0.5	700.053	3	45.67	F16:7035	4	463	481
32	17	P00450|CERU_HUMAN	R.TTIEKPVWLGFLGPIIK.A	Y	56.73	1911.12	-2.2	956.567	2	70.71	F16:11334	3	82	98
32	17	P00450|CERU_HUMAN	R.SVPPSASHVAPTETFTYEWTVPKEVGPTNADPVC(+105.06)LAK.M	Y	56.43	4029.98	2.2	1008.51	4	51.3	F16:8095	2	501	537	S-pyridylethylation
32	17	P00450|CERU_HUMAN	K.DLYSGLIGPLIVC(+105.06)R.R	Y	54.8	1622.89	0.4	812.45	2	65.18	F16:10478	2	888	901	S-pyridylethylation
32	17	P00450|CERU_HUMAN	K.EVGPTNADPVC(+105.06)LAK.M	Y	54.43	1517.75	2.2	759.886	2	32.62	F16:4452	3	524	537	S-pyridylethylation
32	17	P00450|CERU_HUMAN	K.TYC(+105.06)SEPEKVDKDNEDFQESNR.M	Y	53.06	2637.13	-0.3	880.05	3	23.98	F16:2756	4	238	258	S-pyridylethylation
32	17	P00450|CERU_HUMAN	R.M(+15.99)FTTAPDQVDKEDEDFQESNK.M	Y	50.03	2489.05	-0.6	830.692	3	38.31	F16:5584	2	599	619	Oxidation (M)
32	17	P00450|CERU_HUMAN	R.SGAGTEDSAC(+105.06)IPWAYYSTVDQVKDLYSGLIGPLIVC(+105.06)R.R	Y	49.07	4157.03	1.5	1040.27	4	77.23	F16:12255	1	865	901	S-pyridylethylation
32	17	P00450|CERU_HUMAN	R.QSEDSTFYLGER.T	Y	49.04	1430.63	0.1	716.323	2	39.64	F16:5853	1	721	732
32	17	P00450|CERU_HUMAN	R.MFTTAPDQVDKEDEDFQESNK.M	Y	48.56	2473.06	-0.2	825.36	3	38.3	F16:5582	2	599	619
32	17	P00450|CERU_HUMAN	R.GPEEEHLGILGPVIWAEVGDTIR.V	Y	46.13	2486.28	2.4	829.769	3	71.94	F16:11530	1	440	462
32	17	P00450|CERU_HUMAN	R.QYTDSTFRVPVER.K	Y	44.52	1596.79	-2.6	799.4	2	37.88	F16:5499	4	786	798
32	17	P00450|CERU_HUMAN	R.IYHSHIDAPKDIASGLIGPLIIC(+105.06)K.K	Y	43.17	2678.46	-1.9	670.621	4	54.73	F16:8717	2	178	201	S-pyridylethylation
32	17	P00450|CERU_HUMAN	K.DSLDKEKEK.H	Y	38.86	1090.55	-1.3	546.282	2	5.94	F16:521	2	203	211
32	17	P00450|CERU_HUMAN	K.MYYSAVDPTKDIFTGLIGPM(+15.99)K.I	Y	38.4	2362.16	-0.2	788.393	3	61.39	F16:9880	2	538	558	Oxidation (M)
32	17	P00450|CERU_HUMAN	K.DIASGLIGPLIIC(+105.06)KK.D	Y	34.79	1644.96	-0.5	549.328	3	55.96	F16:8937	4	188	202	S-pyridylethylation
32	17	P00450|CERU_HUMAN	K.HIDREFVVMFSVVDENFSWYLEDNIK.T	Y	34.31	3230.54	1.1	808.643	4	97.9	F18:11308	10	212	237
32	17	P00450|CERU_HUMAN	K.SSSKDNIR.G	Y	24.2	905.457	-1.8	453.735	2	4.22	F16:342	2	360	367
32	17	P00450|CERU_HUMAN	R.GVYSSDVFDIFPGTYQTLEM(+15.99)FPR.T	Y	24.11	2684.25	3.2	895.759	3	77.73	F18:9615	1	1009	1031	Oxidation (M)
32	17	P00450|CERU_HUMAN	R.IYHSHIDAPKDIASGLIGPLIIC(+105.06)KK.D	Y	21.33	2806.56	0.2	702.646	4	52.02	F16:8232	1	178	202	S-pyridylethylation
32	17	P00450|CERU_HUMAN	K.HYYIGIIETTWDYASDHGEKK.L	Y	19.81	2525.19	0.6	632.304	4	55.36	F16:8829	1	23	43
40	31	P68871|HBB_HUMAN	R.FFESFGDLSTPDAVM(+15.99)GNPK.V	Y	115.3	2073.94	-1.4	1037.97	2	54.55	F19:5941	9	42	60	Oxidation (M)
40	31	P68871|HBB_HUMAN	M.VHLTPEEKSAVTALWGKVNVDEVGGEALGR.L	Y	107.25	3160.65	-2.3	1054.56	3	58.36	F19:6408	12	2	31
40	31	P68871|HBB_HUMAN	R.FFESFGDLSTPDAVM(+15.99)GNPKVK.A	Y	100.73	2301.1	0.8	768.041	3	55.61	F19:6073	3	42	62	Oxidation (M)
40	31	P68871|HBB_HUMAN	R.FFESFGDLSTPDAVMGNPKVK.A	Y	98.57	2285.1	-1.9	1143.56	2	55.76	F19:6091	3	42	62
40	31	P68871|HBB_HUMAN	R.FFESFGDLSTPDAVMGNPK.V	Y	96.54	2057.94	1.6	1029.98	2	59.02	F18:7552	12	42	60
40	31	P68871|HBB_HUMAN	K.VNVDEVGGEALGR.L	Y	95.27	1313.66	-1.9	657.835	2	37.68	F19:3961	14	19	31
40	31	P68871|HBB_HUMAN	K.VVAGVANALAHKYH	N	94.19	1448.79	1.1	725.403	2	34.15	F19:3530	7	134	147
40	31	P68871|HBB_HUMAN	M.VHLTPEEKSAVTALWGK.V	Y	89.23	1865	-2	933.508	2	48.48	F19:5213	5	2	18
40	31	P68871|HBB_HUMAN	K.SAVTALWGKVNVDEVGGEALGR.L	Y	86.32	2227.16	-0.6	743.393	3	57.02	F19:6249	6	10	31
40	31	P68871|HBB_HUMAN	R.LLVVYPWTQR.F	N	80.43	1273.72	-0.2	637.866	2	56.39	F19:6167	8	32	41
40	31	P68871|HBB_HUMAN	K.EFTPPVQAAYQK.V	Y	65.19	1377.69	0.1	689.854	2	37.72	F19:3967	1	122	133
40	31	P68871|HBB_HUMAN	M.VHLTPEEK.S	N	53.68	951.503	-2	476.758	2	17.08	F19:1408	22	2	9
20	38	P00734|THRB_HUMAN	R.IVEGSDAEIGMSPWQVMLFR.K	Y	117.13	2264.1	1.6	1133.06	2	72.54	F19:7939	13	364	383
20	38	P00734|THRB_HUMAN	R.ELLESYIDGR.I	Y	84.92	1193.59	0.7	597.804	2	47.62	F19:5116	4	354	363
20	38	P00734|THRB_HUMAN	R.TATSEYQTFFNPR.T	Y	84.45	1560.72	-1.6	781.366	2	47.9	F20:3929	8	315	327
20	38	P00734|THRB_HUMAN	K.SLEDKTERELLESYIDGR.I	Y	84.14	2152.06	0.4	718.362	3	53.47	F19:5814	4	346	363
20	38	P00734|THRB_HUMAN	K.HQDFNSAVQLVENFC(+105.06)R.N	Y	73.6	2010.94	0	671.32	3	58.19	F17:8766	4	248	263	S-pyridylethylation
20	38	P00734|THRB_HUMAN	K.GQPSVLQVVNLPIVERPVC(+105.06)K.D	Y	65.26	2279.28	2.2	1140.65	2	54.66	F16:8705	8	518	537	S-pyridylethylation
20	38	P00734|THRB_HUMAN	R.SEGSSVNLSPPLEQC(+105.06)VPDR.G	Y	61.39	2118.01	-0.3	707.009	3	42.27	F17:6140	1	199	217	S-pyridylethylation
20	38	P00734|THRB_HUMAN	R.VTGWGNLKETWTANVGK.G	Y	60.09	1859.95	0.2	930.984	2	49.26	F16:7719	3	501	517
20	38	P00734|THRB_HUMAN	R.IVEGSDAEIGMSPWQVMLFRK.S	Y	59.01	2392.19	0.3	798.405	3	64.12	F17:9672	8	364	384
20	38	P00734|THRB_HUMAN	R.GDAC(+105.06)EGDSGGPFVM(+15.99)K.S	Y	55.52	1589.65	-1.9	795.83	2	33.39	F17:4553	6	561	575	S-pyridylethylation; Oxidation (M)
20	38	P00734|THRB_HUMAN	R.NIEKISM(+15.99)LEK.I	Y	47	1219.65	1.4	610.832	2	35.69	F17:4948	4	437	446	Oxidation (M)
20	38	P00734|THRB_HUMAN	R.TFGSGEADC(+105.06)GLRPLFEK.K	Y	46.27	1930.92	-0.2	644.649	3	44.35	F19:4746	5	328	344	S-pyridylethylation
20	38	P00734|THRB_HUMAN	R.YNWRENLDRDIALMK.L	Y	44.7	1935.96	-0.5	646.328	3	53.23	F16:8448	8	453	467
20	38	P00734|THRB_HUMAN	R.ITDNM(+15.99)FC(+105.06)AGYKPDEGKR.G	Y	42.61	2064.94	-0.8	689.32	3	32.11	F16:4348	3	544	560	Oxidation (M); S-pyridylethylation
20	38	P00734|THRB_HUMAN	R.ENLDRDIALM(+15.99)K.L	Y	41.33	1332.67	0.3	667.343	2	40.29	F17:5788	2	457	467	Oxidation (M)
20	38	P00734|THRB_HUMAN	K.KPVAFSDYIHPVC(+105.06)LPDRETAASLLQAGYK.G	Y	40.99	3293.69	1.4	824.431	4	54.55	F16:8684	4	470	498	S-pyridylethylation
20	38	P00734|THRB_HUMAN	K.IYIHPR.Y	Y	40.73	797.455	0.3	399.735	2	18.78	F18:1718	10	447	452
20	38	P00734|THRB_HUMAN	K.LKKPVAFSDYIHPVC(+105.06)LPDRETAASLLQAGYK.G	Y	40.3	3534.87	-0.4	884.724	4	52.94	F16:8394	2	468	498	S-pyridylethylation
20	38	P00734|THRB_HUMAN	R.SEGSSVNLSPPLEQC(+105.06)VPDRGQQYQGR.L	Y	39.9	2935.39	-0.2	979.47	3	39.87	F17:5715	2	199	224	S-pyridylethylation
20	38	P00734|THRB_HUMAN	K.KSLEDKTERELLESYIDGR.I	Y	36.47	2280.16	-1	571.047	4	48.99	F19:5276	2	345	363
20	38	P00734|THRB_HUMAN	K.ISMLEK.I	Y	20.5	719.389	0.1	360.702	2	28.15	F17:3585	4	441	446
20	38	P00734|THRB_HUMAN	R.IVEGSDAEIGMSPWQVM(+15.99)LFRK.S	Y	19.96	2408.19	-0.3	803.736	3	64.22	F17:9688	1	364	384	Oxidation (M)
20	38	P00734|THRB_HUMAN	R.TFGSGEADC(+140.12)GLRPL(+156.12)FEK.K	Y	15.46	2122.1	2.1	708.376	3	55.02	F16:8771	1	328	344	Reduce Schiff base adduct; SL-HNE (L)
31	72	B9A064|IGLL5_HUMAN	K.QSNNKYAASSYLSLTPEQWK.S	N	119.69	2314.12	1.3	1158.07	2	49.87	F18:6325	15	169	188
31	72	B9A064|IGLL5_HUMAN	K.YAASSYLSLTPEQWK.S	N	111.04	1742.85	0.1	872.433	2	55.01	F19:6001	10	174	188
31	72	B9A064|IGLL5_HUMAN	R.SYSC(+105.06)QVTHEGSTVEKTVAPTEC(+105.06)S	N	101.14	2652.18	-0.4	1327.1	2	28.86	F18:3204	14	192	214	S-pyridylethylation
31	72	B9A064|IGLL5_HUMAN	K.ANPTVTLFPPSSEELQANK.A	Y	80.14	2042.03	1	1022.02	2	52.56	F18:6690	3	113	131
31	72	B9A064|IGLL5_HUMAN	R.SYSC(+105.06)QVTHEGSTVEK.T	N	79.68	1758.79	0.4	880.402	2	9.43	F18:879	27	192	206	S-pyridylethylation
31	72	B9A064|IGLL5_HUMAN	K.AGVETTKPSK.Q	Y	77.23	1016.55	-1.2	509.282	2	8.38	F18:723	9	159	168
31	72	B9A064|IGLL5_HUMAN	K.YAASSYLSLTPEQWKSHR.S	N	66.18	2123.04	0.1	708.688	3	45.81	F18:5763	4	174	191
31	72	B9A064|IGLL5_HUMAN	R.SYSCQVTHEGSTVEKTVAPTEC(+105.06)S	N	66.1	2547.13	3.5	850.052	3	33.38	F18:3924	1	192	214	S-pyridylethylation
31	72	B9A064|IGLL5_HUMAN	K.ADGSPVKAGVETTKPSK.Q	Y	51.51	1670.88	1	557.969	3	9.41	F18:875	2	152	168
31	72	B9A064|IGLL5_HUMAN	K.SHRSYSC(+105.06)QVTHEGSTVEK.T	N	47.15	2138.98	0.4	714.001	3	17.8	F18:1611	3	189	206	S-pyridylethylation
31	72	B9A064|IGLL5_HUMAN	K.SHRSYSC(+105.06)QVTHEGSTVEKTVAPTEC(+105.06)S	N	43.07	3032.38	-2	759.1	4	28.11	F18:3084	2	189	214	S-pyridylethylation
31	72	B9A064|IGLL5_HUMAN	K.ADGSPVK.A	N	40.48	672.344	1.1	337.18	2	8.74	F18:760	2	152	158
31	72	B9A064|IGLL5_HUMAN	K.TVAPTEC(+105.06)S	N	39.68	911.406	-0.8	456.71	2	9.45	F18:883	7	207	214	S-pyridylethylation
31	72	B9A064|IGLL5_HUMAN	K.VTVLGQPK.A	Y	30.1	840.507	4.5	421.263	2	31.47	F18:3620	6	105	112
24	36	P01857|IGHG1_HUMAN	R.TPEVTC(+105.06)VVVDVSHEDPEVK.F	Y	103.56	2186.06	0.2	1094.04	2	42.01	F17:6094	15	139	157	S-pyridylethylation
24	36	P01857|IGHG1_HUMAN	K.TTPPVLDSDGSFFLYSK.L	Y	89.59	1872.91	3.5	937.468	2	58.78	F19:6453	7	276	292
24	36	P01857|IGHG1_HUMAN	K.STSGGTAALGC(+105.06)LVK.D	N	89.3	1368.71	0.1	685.361	2	35.4	F19:3678	13	17	30	S-pyridylethylation
24	36	P01857|IGHG1_HUMAN	K.GFYPSDIAVEWESNGQPENNYK.T	N	88.79	2543.12	1.9	1272.57	2	57.3	F18:7330	1	254	275
24	36	P01857|IGHG1_HUMAN	K.GPSVFPLAPSSK.S	Y	83.45	1185.64	0.5	593.827	2	44.71	F19:4790	8	5	16
24	36	P01857|IGHG1_HUMAN	K.FNWYVDGVEVHNAK.T	Y	82.11	1676.79	-0.2	839.404	2	47.09	F17:6952	6	158	171
24	36	P01857|IGHG1_HUMAN	K.VSNKALPAPIEK.T	N	77.39	1265.73	0.4	633.875	2	26.49	F18:2846	10	206	217
24	36	P01857|IGHG1_HUMAN	K.ALPAPIEKTISK.A	N	73.5	1266.75	-0.3	634.384	2	36.03	F18:4328	7	210	221
24	36	P01857|IGHG1_HUMAN	R.EPQVYTLPPSRDELTK.N	Y	72.59	1871.96	-1.2	936.988	2	38.25	F17:5428	4	228	243
24	36	P01857|IGHG1_HUMAN	K.GQPREPQVYTLPPSRDELTK.N	Y	66.74	2310.2	-0.8	771.072	3	35.5	F17:4913	4	224	243
24	36	P01857|IGHG1_HUMAN	R.VVSVLTVLHQDWLNGKEYK.C	N	60.52	2227.2	-0.4	743.407	3	60.9	F17:9186	5	185	203
24	36	P01857|IGHG1_HUMAN	K.NQVSLTC(+105.06)LVK.G	N	58.09	1208.66	1	605.337	2	37.86	F19:3983	8	244	253	S-pyridylethylation
24	36	P01857|IGHG1_HUMAN	K.GQPREPQVYTLPPSRDELTKNQVSLTC(+105.06)LVK.G	Y	38.9	3500.84	0.2	876.219	4	45.72	F17:6735	2	224	253	S-pyridylethylation
24	36	P01857|IGHG1_HUMAN	K.LTVDKSR.W	N	35.56	817.466	1.4	409.741	2	7.91	F17:745	4	293	299
24	36	P01857|IGHG1_HUMAN	K.DTLMISR.T	N	35.29	834.427	0.8	418.221	2	32.34	F16:4392	3	132	138
24	36	P01857|IGHG1_HUMAN	K.DTLM(+15.99)ISR.T	N	34.73	850.422	0	426.218	2	27.8	F17:3523	5	132	138	Oxidation (M)
24	36	P01857|IGHG1_HUMAN	K.VDKKVEPK.S	Y	34.55	941.555	0.3	314.859	3	7.53	F17:682	7	94	101
24	36	P01857|IGHG1_HUMAN	K.SC(+105.06)DKTHTC(+105.06)PPC(+105.06)PAPELLGGPSVFLFPPKPK.D	Y	31.28	3477.74	2.8	870.446	4	54.57	F17:8169	1	102	131	S-pyridylethylation
24	36	P01857|IGHG1_HUMAN	K.AKGQPREPQVYTLPPSRDELTK.N	Y	27.26	2509.33	0.3	628.34	4	32.88	F17:4455	2	222	243
24	36	P01857|IGHG1_HUMAN	K.AKGQPR.E	N	22.34	655.376	0.1	328.696	2	3.36	F17:252	2	222	227
24	36	P01857|IGHG1_HUMAN	K.ALPAPIEK.T	N	21.06	837.496	0.6	419.755	2	29.54	F16:3846	6	210	217
11	18	P20742|PZP_HUMAN	K.AGAFC(+105.06)LSEDAGLGISSTASLR.A	N	126.55	2130.04	-0.8	1066.03	2	98.26	F19:10120	171	773	793	S-pyridylethylation
11	18	P20742|PZP_HUMAN	K.MVSGFIPLKPTVK.M	N	105.04	1415.82	0.7	708.918	2	45.3	F18:5694	12	1391	1403
11	18	P20742|PZP_HUMAN	K.GSFALSFPVESDVAPIAR.M	Y	86.26	1861.96	0.8	931.987	2	61.37	F16:9876	2	518	535
11	18	P20742|PZP_HUMAN	K.M(+15.99)VSGFIPLKPTVK.M	N	80.93	1431.82	-0.2	716.915	2	45.2	F18:5679	17	1391	1403	Oxidation (M)
11	18	P20742|PZP_HUMAN	R.NQGNTWLTAFVLK.T	N	75.26	1490.79	0.9	746.402	2	66.52	F17:10034	4	1041	1053
11	18	P20742|PZP_HUMAN	R.SSGSLLNNAIK.G	N	72.9	1102.6	-1.8	552.305	2	36.9	F17:5168	5	1088	1098
11	18	P20742|PZP_HUMAN	R.AFQPFFVELTMPYSVIR.G	N	60.44	2044.05	1.8	1023.03	2	77.36	F16:12273	4	794	810
11	18	P20742|PZP_HUMAN	R.YGAATFTR.T	N	59.95	885.434	0	443.724	2	27.81	F17:3524	4	1270	1277
11	18	P20742|PZP_HUMAN	R.AFQPFFVELTM(+15.99)PYSVIR.G	N	58.48	2060.04	0.8	1031.03	2	77.47	F16:12287	2	794	810	Oxidation (M)
11	18	P20742|PZP_HUMAN	K.TLLVEAEGIEQEK.T	Y	57.67	1457.76	-0.9	729.887	2	45.8	F16:7059	1	908	920
11	18	P20742|PZP_HUMAN	K.ATVLNYLPK.C	N	52.33	1017.59	-1	509.8	2	48.2	F16:7514	2	818	826
11	18	P20742|PZP_HUMAN	K.VYDYYETDESVVAEYIAPC(+105.06)STDTEHGNV	Y	49.64	3273.4	3.9	1092.14	3	58.28	F16:9352	2	1455	1482	S-pyridylethylation
11	18	P20742|PZP_HUMAN	R.NELIPLIYLENPRR.N	Y	48.19	1738.97	0	870.494	2	59.12	F16:9497	2	158	171
11	18	P20742|PZP_HUMAN	R.IQHPFTVEEFVLPKFEVK.V	Y	38.69	2186.18	-1.8	547.551	4	59.44	F16:9549	2	214	231
22	19	P01009|A1AT_HUMAN	K.VFSNGADLSGVTEEAPLK.L	Y	94.03	1832.92	0.7	917.466	2	46.39	F17:6843	2	335	352
22	19	P01009|A1AT_HUMAN	K.ITPNLAEFAFSLYR.Q	Y	83.6	1640.86	0.6	821.436	2	72.43	F17:10856	7	50	63
22	19	P01009|A1AT_HUMAN	K.SVLGQLGITK.V	Y	80.61	1014.61	-0.9	508.31	2	47.67	F18:6020	6	325	334
22	19	P01009|A1AT_HUMAN	K.ELDRDTVFALVNYIFFK.G	Y	75.89	2089.09	1.1	1045.55	2	87.5	F17:12683	5	199	215
22	19	P01009|A1AT_HUMAN	K.GTEAAGAMFLEAIPMSIPPEVK.F	Y	74.09	2258.13	2.4	1130.08	2	70.76	F17:10626	3	368	389
22	19	P01009|A1AT_HUMAN	K.QINDYVEKGTQGK.I	Y	69.24	1478.74	-0.2	740.375	2	25.82	F17:3187	5	180	192
22	19	P01009|A1AT_HUMAN	K.VFSNGADLSGVTEEAPLKLSK.A	Y	61.15	2161.13	1	721.384	3	48.23	F17:7146	4	335	355
22	19	P01009|A1AT_HUMAN	K.LSITGTYDLK.S	Y	58.15	1109.6	-0.5	555.805	2	43.53	F20:3559	28	315	324
22	19	P01009|A1AT_HUMAN	K.FNKPFVFLMIEQNTKSPLFMGK.V	Y	57.15	2615.36	1.3	872.797	3	68	F17:10247	2	390	411
22	19	P01009|A1AT_HUMAN	K.LVDKFLEDVKK.L	Y	56.41	1332.77	-1	667.389	2	37.71	F17:5325	4	150	160
22	19	P01009|A1AT_HUMAN	K.IVDLVKELDRDTVFALVNYIFFK.G	Y	55.82	2756.52	1.8	919.847	3	91.43	F17:13134	4	193	215
22	19	P01009|A1AT_HUMAN	K.LSSWVLLMK.Y	Y	55.8	1075.61	-0.7	538.812	2	59.91	F17:9034	2	259	267
22	19	P01009|A1AT_HUMAN	R.SASLHLPK.L	Y	55.2	851.486	0.8	426.751	2	26.97	F17:3380	7	307	314
22	19	P01009|A1AT_HUMAN	K.FNKPFVFLMIEQNTK.S	Y	55.09	1854.97	0	619.331	3	63.06	F17:9512	7	390	404
22	19	P01009|A1AT_HUMAN	K.AVLTIDEK.G	Y	51.7	887.496	-0.1	444.755	2	31.92	F17:4273	2	360	367
22	19	P01009|A1AT_HUMAN	K.SPLFMGK.V	Y	50.16	778.405	-0.2	390.21	2	37.07	F17:5197	2	405	411
22	19	P01009|A1AT_HUMAN	K.FNKPFVFLM(+15.99)IEQNTK.S	Y	44.16	1870.97	0.8	624.663	3	63.65	F17:9602	2	390	404	Oxidation (M)
22	19	P01009|A1AT_HUMAN	K.KQINDYVEKGTQGK.I	Y	42.27	1606.83	0.9	536.618	3	22.08	F17:2527	1	179	192
22	19	P01009|A1AT_HUMAN	K.QINDYVEK.G	Y	39.97	1007.49	-1.2	504.753	2	25.64	F17:3157	2	180	187
22	19	P01009|A1AT_HUMAN	K.KQINDYVEK.G	Y	39.13	1135.59	-1.8	568.8	2	22.32	F17:2576	2	179	187
22	19	P01009|A1AT_HUMAN	K.VVNPTQK	Y	38.97	784.444	-0.6	393.229	2	9.42	F17:941	1	412	418
22	19	P01009|A1AT_HUMAN	K.FLENEDRR.S	Y	32.67	1077.52	-2.5	539.766	2	19.56	F17:2098	3	299	306
22	19	P01009|A1AT_HUMAN	K.GTEAAGAM(+15.99)FLEAIPMSIPPEVK.F	Y	31.64	2274.13	1	1138.07	2	66.67	F17:10057	2	368	389	Oxidation (M)
22	19	P01009|A1AT_HUMAN	K.SPLFM(+15.99)GK.V	Y	25.59	794.4	0.3	398.207	2	36.48	F17:5093	4	405	411	Oxidation (M)
22	19	P01009|A1AT_HUMAN	K.AVLTIDEKGTEAAGAMFLEAIPMSIPPEVK.F	Y	24.72	3127.62	-0.1	1043.55	3	72.59	F18:9122	10	360	389
22	19	P01009|A1AT_HUMAN	K.VPM(+15.99)M(+15.99)K.R	Y	23.48	636.298	1.3	319.156	2	21.24	F17:2382	2	242	246	Oxidation (M)
22	19	P01009|A1AT_HUMAN	K.IVDLVK.E	Y	22.55	685.437	-2.1	343.725	2	31.63	F17:4220	1	193	198
88	129	P02656|APOC3_HUMAN	K.TAKDALSSVQESQVAQQAR.G	Y	159.06	2016.02	-0.7	1009.02	2	32.63	F19:3337	6	42	60
88	129	P02656|APOC3_HUMAN	K.HATKTAKDALSSVQESQVAQQAR.G	Y	120.58	2453.26	-0.2	818.761	3	30.13	F19:3015	5	38	60
88	129	P02656|APOC3_HUMAN	K.DALSSVQESQVAQQAR.G	Y	104.16	1715.84	-1.2	858.928	2	36.38	F19:3806	12	45	60
88	129	P02656|APOC3_HUMAN	R.GWVTDGFSSLK.D	Y	73.03	1195.59	2.3	598.802	2	51.81	F19:5616	2	61	71
50	4	P19827|ITIH1_HUMAN	K.GSLVQASEANLQAAQDFVR.G	Y	92.83	2003.01	-0.1	1002.51	2	57.72	F17:8693	6	342	360
50	4	P19827|ITIH1_HUMAN	K.ILGDMQPGDYFDLVLFGTR.V	Y	92.78	2156.06	1.9	1079.04	2	79.03	F16:12493	2	318	336
50	4	P19827|ITIH1_HUMAN	R.GFSLDEATNLNGGLLR.G	Y	85.76	1675.85	2	838.935	2	57.58	F17:8668	5	361	376
50	4	P19827|ITIH1_HUMAN	R.LWAYLTIQELLAK.R	Y	76.49	1560.89	1.2	781.454	2	110.86	F17:15009	5	565	577
50	4	P19827|ITIH1_HUMAN	R.VQSWKGSLVQASEANLQAAQDFVR.G	Y	72.69	2631.34	0.5	878.121	3	58.75	F16:9435	2	337	360
50	4	P19827|ITIH1_HUMAN	K.AAISGENAGLVR.A	Y	70.58	1156.62	0.5	579.318	2	30.47	F17:4016	4	126	137
50	4	P19827|ITIH1_HUMAN	R.KAAISGENAGLVR.A	Y	70.53	1284.71	-0.1	643.365	2	25.2	F17:3082	9	125	137
50	4	P19827|ITIH1_HUMAN	R.QAVDTAVDGVFIR.S	Y	69.3	1389.73	-0.1	695.87	2	47.9	F16:7456	2	42	54
50	4	P19827|ITIH1_HUMAN	R.GMADQDGLKPTIDKPSEDSPPLEMLGPR.R	Y	64.99	2993.45	-1.8	998.821	3	48.86	F16:7644	4	613	640
50	4	P19827|ITIH1_HUMAN	K.QYYEGSEIVVAGR.I	Y	64.69	1469.71	0	735.865	2	38.22	F16:5566	4	502	514
50	4	P19827|ITIH1_HUMAN	K.LDAQASFLPK.E	Y	61.89	1088.59	-1.8	545.3	2	42.54	F17:6190	3	205	214
50	4	P19827|ITIH1_HUMAN	R.IYEDHDATQQLQGFYSQVAKPLLVDVDLQYPQDAVLALTQNHHK.Q	Y	58.96	5048.53	-1.1	1263.14	4	71.97	F16:11536	1	458	501
50	4	P19827|ITIH1_HUMAN	R.EVAFDLEIPK.T	Y	56.6	1159.61	1.5	580.814	2	54.19	F19:5894	8	84	93
50	4	P19827|ITIH1_HUMAN	R.GM(+15.99)ADQDGLKPTIDKPSEDSPPLEMLGPR.R	Y	48.75	3009.44	-1.6	753.367	4	47.4	F16:7359	1	613	640	Oxidation (M)
50	4	P19827|ITIH1_HUMAN	K.ELAAQTIK.K	Y	38.54	872.497	0.2	437.256	2	22.35	F16:2466	2	215	222
50	4	P19827|ITIH1_HUMAN	R.LWAYLTIQELLAKR.M	Y	35.38	1716.99	-0.8	573.338	3	70.97	F17:10655	4	565	578
50	4	P19827|ITIH1_HUMAN	K.ILGDM(+15.99)QPGDYFDLVLFGTR.V	Y	26.85	2172.06	2.1	1087.04	2	74.94	F16:11940	1	318	336	Oxidation (M)
50	4	P19827|ITIH1_HUMAN	K.ADVQAHGEGQEFSITC(+105.06)LVDEEEMK.K	Y	24.25	2769.23	-1.8	693.313	4	52.48	F16:8312	1	525	548	S-pyridylethylation
50	4	P19827|ITIH1_HUMAN	R.LTVTR.G	N	22.1	588.36	1.9	295.188	2	21.18	F17:2372	1	865	869
37	25	P04217|A1BG_HUMAN	R.TPGAAANLELIFVGPQHAGNYR.C	Y	90.82	2295.18	2	1148.6	2	58	F16:9298	15	448	469
37	25	P04217|A1BG_HUMAN	K.SLPAPWLSMAPVSWITPGLK.T	Y	82.95	2150.16	2.7	1076.09	2	79.1	F16:12504	5	115	134
37	25	P04217|A1BG_HUMAN	K.VTLTC(+105.06)VAPLSGVDFQLR.R	Y	81.29	1923.03	0.7	962.522	2	57.06	F16:9129	5	228	244	S-pyridylethylation
37	25	P04217|A1BG_HUMAN	K.HQFLLTGDTQGR.Y	Y	71.2	1371.69	-0.2	686.852	2	33.57	F16:4635	4	79	90
37	25	P04217|A1BG_HUMAN	R.SWVPHTFESELSDPVELLVAES	Y	70.43	2470.19	1	1236.1	2	75.23	F19:8185	8	474	495
37	25	P04217|A1BG_HUMAN	R.C(+105.06)EGPIPDVTFELLREGETK.A	Y	69.56	2237.1	0.2	1119.56	2	56.76	F16:9076	7	423	441	S-pyridylethylation
37	25	P04217|A1BG_HUMAN	R.C(+105.06)EGPIPDVTFELLR.E	Y	64.62	1692.85	1.1	847.435	2	59.87	F16:9625	3	423	436	S-pyridylethylation
37	25	P04217|A1BG_HUMAN	K.SLPAPWLSM(+15.99)APVSWITPGLK.T	Y	61.3	2166.15	0.7	1084.09	2	79.32	F16:12533	2	115	134	Oxidation (M)
37	25	P04217|A1BG_HUMAN	R.SGLSTGWTQLSK.L	Y	59.21	1263.65	-0.5	632.83	2	43.27	F16:6571	2	95	106
37	25	P04217|A1BG_HUMAN	R.LHDNQNGWSGDSAPVELILSDETLPAPEFSPEPESGR.A	Y	59.05	3989.86	2.9	1330.96	3	66.21	F16:10637	1	283	319
37	25	P04217|A1BG_HUMAN	R.ATWSGAVLAGR.D	Y	55.8	1087.58	-1.1	544.795	2	40.67	F16:6054	3	407	417
37	25	P04217|A1BG_HUMAN	R.SSTSPDRIFFHLNAVALGDGGHYTC(+105.06)R.Y	Y	49.35	2925.4	-0.4	732.356	4	50.92	F17:7586	4	255	280	S-pyridylethylation
37	25	P04217|A1BG_HUMAN	R.RGEKELLVPR.S	Y	46.3	1195.7	0.7	598.86	2	23.84	F16:2731	6	245	254
37	25	P04217|A1BG_HUMAN	K.NGVAQEPVHLDSPAIKHQFLLTGDTQGR.Y	Y	45.54	3027.55	-0.7	757.895	4	44.87	F16:6882	2	63	90
37	25	P04217|A1BG_HUMAN	R.YRSWVPHTFESELSDPVELLVAES	Y	44.46	2789.35	-2.1	930.79	3	71.05	F17:10668	3	472	495
37	25	P04217|A1BG_HUMAN	R.GEKELLVPR.S	Y	42.37	1039.6	-1	520.808	2	28.11	F16:3558	3	246	254
37	25	P04217|A1BG_HUMAN	R.IFFHLNAVALGDGGHYTC(+105.06)R.Y	Y	41.87	2195.07	-2.2	549.774	4	48.93	F16:7657	2	262	280	S-pyridylethylation
37	25	P04217|A1BG_HUMAN	R.C(+105.06)LAPLEGAR.F	Y	38.31	1033.54	-0.5	517.776	2	27.59	F17:3487	6	325	333	S-pyridylethylation
37	25	P04217|A1BG_HUMAN	R.GVTFLLR.R	Y	32.37	804.486	0.7	403.25	2	48.33	F16:7538	2	145	151
37	25	P04217|A1BG_HUMAN	R.TDGEGALSEPSATVTIEELAAPPPPVLMHHGESSQVLHPGNK.V	Y	31.66	4299.11	0.2	1075.79	4	55.66	F16:8880	2	186	227
37	25	P04217|A1BG_HUMAN	R.FALVR.E	Y	30.22	604.37	0.5	303.192	2	34.39	F17:4731	4	334	338
37	25	P04217|A1BG_HUMAN	R.LELHVDGPPPRPQLR.A	Y	29.85	1722.95	-1.6	575.324	3	38.03	F16:5530	4	392	406
37	25	P04217|A1BG_HUMAN	R.FALVREDR.G	Y	29.42	1004.54	-2.1	503.276	2	28.79	F16:3699	5	334	341
37	25	P04217|A1BG_HUMAN	R.C(+105.06)EGPIPDVTFELLREGETKAVK.T	Y	27.5	2535.3	-0.5	634.833	4	55.63	F16:8875	2	423	444	S-pyridylethylation
26	21	P02787|TRFE_HUMAN	R.SAGWNIPIGLLYC(+105.06)DLPEPR.K	Y	93.2	2218.12	-1.3	1110.07	2	68.67	F18:8699	10	144	162	S-pyridylethylation
26	21	P02787|TRFE_HUMAN	K.MYLGYEYVTAIR.N	Y	78.93	1477.73	0.8	739.872	2	110.89	F17:15013	8	332	343
26	21	P02787|TRFE_HUMAN	K.NLNEKDYELLC(+105.06)LDGTR.K	Y	73.88	1999.97	0.9	1000.99	2	44.88	F16:6883	9	572	587	S-pyridylethylation
26	21	P02787|TRFE_HUMAN	R.FDEFFSEGC(+105.06)APGSK.K	Y	69.97	1624.69	0.1	813.351	2	41.58	F16:6237	4	495	508	S-pyridylethylation
26	21	P02787|TRFE_HUMAN	K.DGAGDVAFVK.H	Y	67.71	977.482	-0.3	489.748	2	34.65	F17:4773	4	216	225
26	21	P02787|TRFE_HUMAN	K.SVIPSDGPSVAC(+105.06)VK.K	Y	63.7	1462.75	-0.2	732.382	2	33.99	F18:4020	10	47	60	S-pyridylethylation
26	21	P02787|TRFE_HUMAN	R.SMGGKEDLIWELLNQAQEHFGKDK.S	Y	61.48	2772.35	0.2	925.125	3	69.43	F16:11141	4	274	297
26	21	P02787|TRFE_HUMAN	R.KPVDEYKDC(+105.06)HLAQVPSHTVVAR.S	Y	59.14	2596.32	0.1	866.448	3	30.51	F16:4026	5	252	273	S-pyridylethylation
26	21	P02787|TRFE_HUMAN	K.DSGFQMNQLR.G	Y	53.52	1194.55	-1	598.279	2	39.64	F16:5852	1	123	132
26	21	P02787|TRFE_HUMAN	R.WC(+105.06)AVSEHEATK.C	Y	51.06	1364.62	-0.7	455.88	3	20.36	F17:2234	3	27	37	S-pyridylethylation
26	21	P02787|TRFE_HUMAN	K.DSGFQM(+15.99)NQLR.G	Y	48.6	1210.54	-0.3	606.277	2	39.61	F16:5846	2	123	132	Oxidation (M)
26	21	P02787|TRFE_HUMAN	K.NLNEKDYELLC(+105.06)LDGTRKPVEEYANC(+105.06)HLAR.A	Y	43.34	3615.76	0.3	904.948	4	44.33	F16:6775	2	572	600	S-pyridylethylation
26	21	P02787|TRFE_HUMAN	K.DC(+105.06)HLAQVPSHTVVAR.S	Y	42.7	1736.88	0.5	435.227	4	26.84	F16:3303	1	259	273	S-pyridylethylation
26	21	P02787|TRFE_HUMAN	R.C(+105.06)LVEKGDVAFVK.H	Y	40.51	1411.75	0.6	471.592	3	32.57	F16:4441	2	542	553	S-pyridylethylation
26	21	P02787|TRFE_HUMAN	K.ASYLDC(+105.06)IR.A	Y	38.73	1044.51	-0.4	523.26	2	36.5	F16:5223	4	62	69	S-pyridylethylation
26	21	P02787|TRFE_HUMAN	K.C(+105.06)LKDGAGDVAFVK.H	Y	36.63	1426.73	-0.7	476.583	3	29.55	F16:3849	2	213	225	S-pyridylethylation
26	21	P02787|TRFE_HUMAN	K.SC(+105.06)HTGLGR.S	Y	36.45	934.444	-2.4	468.228	2	8.86	F18:777	6	136	143	S-pyridylethylation
26	21	P02787|TRFE_HUMAN	R.SM(+15.99)GGKEDLIWELLNQAQEHFGKDK.S	Y	35.93	2788.35	0.4	698.095	4	68.35	F16:10981	1	274	297	Oxidation (M)
26	21	P02787|TRFE_HUMAN	K.DLLFRDDTVC(+105.06)LAK.L	Y	34.79	1612.83	-0.8	538.616	3	46.31	F16:7152	3	647	659	S-pyridylethylation
26	21	P02787|TRFE_HUMAN	R.SETKDLLFRDDTVC(+105.06)LAK.L	Y	33.24	2058.05	-0.2	687.022	3	40.8	F17:5878	7	643	659	S-pyridylethylation
26	21	P02787|TRFE_HUMAN	K.SC(+105.06)HTAVGR.T	Y	32.6	934.444	1	312.489	3	8.18	F16:750	6	468	475	S-pyridylethylation
26	21	P02787|TRFE_HUMAN	K.C(+105.06)QSFRDHMK.S	Y	31.92	1255.56	-0.4	628.787	2	9.08	F16:889	2	38	46	S-pyridylethylation
26	21	P02787|TRFE_HUMAN	R.KC(+105.06)STSSLLEAC(+105.06)TFR.R	Y	29.81	1754.85	-0.4	439.719	4	35.84	F16:5091	2	683	696	S-pyridylethylation
26	21	P02787|TRFE_HUMAN	K.C(+105.06)QSFRDHM(+15.99)K.S	Y	28.78	1271.55	-0.2	636.784	2	9.08	F16:890	1	38	46	S-pyridylethylation; Oxidation (M)
26	21	P02787|TRFE_HUMAN	K.HSTIFENLANKADRDQYELLC(+105.06)LDNTR.K	Y	28.72	3183.54	0.6	796.893	4	53.73	F16:8537	2	226	251	S-pyridylethylation
26	21	P02787|TRFE_HUMAN	K.KASYLDC(+105.06)IR.A	Y	27.6	1172.6	0.4	391.875	3	30.8	F16:4082	2	61	69	S-pyridylethylation
26	21	P02787|TRFE_HUMAN	R.KPVEEYANC(+105.06)HLAR.A	Y	25.98	1633.8	-2.2	545.607	3	22.67	F16:2523	4	588	600	S-pyridylethylation
26	21	P02787|TRFE_HUMAN	R.KDKEAC(+105.06)VHK.I	Y	23.76	1161.6	-1.3	581.805	2	7.18	F16:626	1	610	618	S-pyridylethylation
44	81	P05090|APOD_HUMAN	K.C(+105.06)PNPPVQENFDVNKYLGR.W	Y	97.44	2194.06	-1.3	1098.04	2	44.95	F18:5646	11	28	45	S-pyridylethylation
44	81	P05090|APOD_HUMAN	K.KMTVTDQVNC(+105.06)PK.L	Y	84.74	1467.72	0.1	734.868	2	22.03	F18:2164	8	176	187	S-pyridylethylation
44	81	P05090|APOD_HUMAN	K.NILTSNNIDVKK.M	Y	82.45	1357.76	0.6	679.886	2	32.83	F18:3839	4	165	176
44	81	P05090|APOD_HUMAN	K.M(+15.99)TVTDQVNC(+105.06)PK.L	Y	81.63	1355.62	-1.4	678.817	2	25.83	F18:2750	13	177	187	Oxidation (M); S-pyridylethylation
44	81	P05090|APOD_HUMAN	R.WYEIEKIPTTFENGR.C	Y	79.79	1881.93	0.5	628.316	3	51.12	F18:6495	4	46	60
44	81	P05090|APOD_HUMAN	K.MTVTDQVNC(+105.06)PK.L	Y	79.15	1339.63	-0.7	670.82	2	25.82	F18:2748	8	177	187	S-pyridylethylation
44	81	P05090|APOD_HUMAN	K.M(+15.99)TVTDQVNC(+105.06)PKLS	Y	77.25	1555.74	0.6	778.876	2	33.83	F18:3994	4	177	189	Oxidation (M); S-pyridylethylation
44	81	P05090|APOD_HUMAN	K.MTVTDQVNC(+105.06)PKLS	Y	70.33	1539.74	0.4	770.879	2	33.83	F18:3995	4	177	189	S-pyridylethylation
44	81	P05090|APOD_HUMAN	R.NPNLPPETVDSLKNILTSNNIDVK.K	Y	68.62	2634.39	0.3	879.136	3	61.47	F18:7872	4	152	175
44	81	P05090|APOD_HUMAN	K.NILTSNNIDVK.K	Y	60.47	1229.66	0	615.838	2	39.94	F17:5726	4	165	175
44	81	P05090|APOD_HUMAN	K.C(+105.06)PNPPVQENFDVNK.Y	Y	54.11	1704.79	-1.9	569.27	3	32.6	F17:4401	2	28	41	S-pyridylethylation
44	81	P05090|APOD_HUMAN	K.IKVLNQELR.A	Y	50.76	1111.67	0.2	556.843	2	34.35	F18:4078	6	74	82
44	81	P05090|APOD_HUMAN	R.NPNLPPETVDSLKNILTSNNIDVKK.M	Y	48.89	2762.48	-1.7	921.833	3	57.29	F18:7328	5	152	176
44	81	P05090|APOD_HUMAN	K.KM(+15.99)TVTDQVNC(+105.06)PK.L	Y	48.35	1483.72	-0.3	742.865	2	22.72	F17:2648	6	176	187	Oxidation (M); S-pyridylethylation
44	81	P05090|APOD_HUMAN	K.KM(+15.99)TVTDQVNC(+105.06)PKLS	Y	47.91	1683.83	-1.2	562.284	3	30.35	F18:3453	2	176	189	Oxidation (M); S-pyridylethylation
44	81	P05090|APOD_HUMAN	K.VLNQELR.A	Y	46.3	870.492	-0.3	436.253	2	23.89	F18:2449	4	76	82
44	81	P05090|APOD_HUMAN	K.KMTVTDQVNC(+105.06)PKLS	Y	38.01	1667.84	-0.9	556.953	3	30.35	F18:3454	2	176	189	S-pyridylethylation
49	27	P04196|HRG_HUMAN	K.SGFPQVSMFFTHTFPK	Y	116.51	1856.89	1.4	929.455	2	64.09	F19:7060	10	510	525
49	27	P04196|HRG_HUMAN	R.ADLFYDVEALDLESPK.N	Y	89.15	1823.88	-0.5	912.948	2	65.65	F18:8368	6	220	235
49	27	P04196|HRG_HUMAN	K.YKEENDDFASFR.V	Y	80.34	1519.66	-0.8	760.836	2	36.14	F17:5030	8	165	176
49	27	P04196|HRG_HUMAN	K.DSPVLIDFFEDTER.Y	Y	79.81	1681.78	1	841.9	2	70.68	F17:10614	5	140	153
49	27	P04196|HRG_HUMAN	K.SGFPQVSM(+15.99)FFTHTFPK	Y	61.86	1872.89	-2.2	937.449	2	61.02	F19:6710	9	510	525	Oxidation (M)
49	27	P04196|HRG_HUMAN	R.DGYLFQLLR.I	Y	60.4	1123.6	0.4	562.809	2	65.71	F18:8375	8	44	52
49	27	P04196|HRG_HUMAN	K.ALEKYKEENDDFASFR.V	Y	54.97	1960.92	-0.7	654.646	3	37.03	F17:5191	2	161	176
49	27	P04196|HRG_HUMAN	R.RPSEIVIGQC(+105.06)K.V	Y	50.94	1333.72	-0.9	445.579	3	24.96	F17:3043	6	96	106	S-pyridylethylation
49	27	P04196|HRG_HUMAN	R.HSHESQDLR.V	Y	48.25	1107.51	-1.5	554.759	2	4.84	F17:402	5	112	120
49	27	P04196|HRG_HUMAN	R.RRDGYLFQLLR.I	Y	44.14	1435.8	-1.6	479.608	3	51.53	F16:8140	2	42	52
49	27	P04196|HRG_HUMAN	K.ALDLINKR.R	Y	43.62	941.566	-0.8	471.79	2	30.24	F17:3969	5	34	41
49	27	P04196|HRG_HUMAN	R.QIGSVYRLPPLR.K	Y	33.89	1397.81	1.2	699.915	2	44.39	F19:4752	4	454	465
49	27	P04196|HRG_HUMAN	R.LPPLR.K	N	24.57	594.385	0.7	298.2	2	26.71	F19:2558	2	461	465
18	51	P04003|C4BPA_HUMAN	K.MALEVYKLSLEIEQLELQR.D	Y	93.49	2304.24	0.7	769.088	3	71.67	F19:7852	16	567	585
18	51	P04003|C4BPA_HUMAN	R.LMQC(+105.06)LPNPEDVKMALEVYKLSLEIEQLELQR.D	Y	85.85	3776.96	-0.8	1259.99	3	79.61	F17:11762	5	555	585	S-pyridylethylation
18	51	P04003|C4BPA_HUMAN	K.LSLEIEQLELQR.D	Y	70.02	1469.81	0.2	735.912	2	56.01	F19:6121	8	574	585
18	51	P04003|C4BPA_HUMAN	R.LMQC(+105.06)LPNPEDVKMALEVYK.L	Y	69.55	2325.16	0.7	776.06	3	57.52	F16:9213	7	555	573	S-pyridylethylation
18	51	P04003|C4BPA_HUMAN	R.LMQC(+105.06)LPNPEDVK.M	Y	68.56	1490.73	-0.7	746.37	2	39.04	F17:5565	8	555	566	S-pyridylethylation
18	51	P04003|C4BPA_HUMAN	K.MALEVYKLSLEIEQLELQRDSAR.Q	Y	59.97	2733.44	1	912.154	3	66	F16:10603	7	567	589
18	51	P04003|C4BPA_HUMAN	R.LM(+15.99)QC(+105.06)LPNPEDVKMALEVYKLSLEIEQLELQR.D	Y	58.53	3792.95	1.7	949.246	4	77.82	F16:12337	2	555	585	Oxidation (M); S-pyridylethylation
18	51	P04003|C4BPA_HUMAN	R.LM(+15.99)QC(+105.06)LPNPEDVK.M	Y	58.35	1506.72	-0.7	754.367	2	38.51	F16:5626	8	555	566	Oxidation (M); S-pyridylethylation
18	51	P04003|C4BPA_HUMAN	R.GVGWSHPLPQC(+105.06)EIVK.C	Y	53.83	1753.9	0.5	877.956	2	39.25	F16:5775	8	160	174	S-pyridylethylation
18	51	P04003|C4BPA_HUMAN	R.TWYPEVPKC(+105.06)EWETPEGC(+105.06)EQVLTGKR.L	Y	50.04	3174.49	1.2	1059.17	3	46.73	F16:7230	6	530	554	S-pyridylethylation
18	51	P04003|C4BPA_HUMAN	R.C(+105.06)HPGYKPTTDEPTTVIC(+105.06)QK.N	Y	49.32	2327.11	0.2	776.71	3	24.54	F16:2865	7	332	350	S-pyridylethylation
18	51	P04003|C4BPA_HUMAN	R.TWYPEVPKC(+105.06)EWETPEGC(+105.06)EQVLTGK.R	Y	48.31	3018.39	0.3	1007.14	3	49.08	F16:7686	5	530	553	S-pyridylethylation
18	51	P04003|C4BPA_HUMAN	K.YTC(+105.06)LPGYVR.S	Y	43.22	1175.58	0.1	588.797	2	32.88	F16:4503	4	79	87	S-pyridylethylation
18	51	P04003|C4BPA_HUMAN	R.KPDVSHGEMVSGFGPIYNYKDTIVFK.C	Y	43.14	2927.45	3.3	732.873	4	52.81	F16:8371	2	241	266
18	51	P04003|C4BPA_HUMAN	K.LSLEIEQLELQRDSAR.Q	Y	42.9	1899.01	0	634.009	3	50.26	F17:7478	4	574	589
18	51	P04003|C4BPA_HUMAN	K.C(+105.06)KPPPDIR.N	Y	41.79	1029.54	0.3	344.188	3	9.46	F17:949	10	175	182	S-pyridylethylation
18	51	P04003|C4BPA_HUMAN	K.C(+105.06)EWETPEGC(+105.06)EQVLTGK.R	Y	40.26	2017.89	0.1	673.638	3	38.27	F16:5576	2	538	553	S-pyridylethylation
18	51	P04003|C4BPA_HUMAN	R.QSTLDKEL	Y	39.87	932.481	-0.8	467.248	2	29.93	F19:2988	4	590	597
18	51	P04003|C4BPA_HUMAN	R.TWYPEVPK.C	Y	39.7	1018.51	-1.3	510.263	2	41.9	F16:6302	2	530	537
18	51	P04003|C4BPA_HUMAN	K.M(+15.99)ALEVYK.L	Y	39.43	868.436	0.4	435.226	2	35.93	F16:5112	4	567	573	Oxidation (M)
18	51	P04003|C4BPA_HUMAN	K.RLMQC(+105.06)LPNPEDVK.M	Y	38.78	1646.83	-0.8	549.949	3	36.37	F16:5197	2	554	566	S-pyridylethylation
18	51	P04003|C4BPA_HUMAN	K.M(+15.99)ALEVYKLSLEIEQLELQR.D	Y	38	2320.23	4.6	774.422	3	71.7	F17:10756	4	567	585	Oxidation (M)
18	51	P04003|C4BPA_HUMAN	K.IAHGHYK.Q	Y	35.64	824.429	0	413.222	2	7.95	F16:717	2	432	438
18	51	P04003|C4BPA_HUMAN	R.WTPYQGC(+105.06)EALC(+105.06)C(+105.06)PEPK.L	Y	35.13	2138.94	0.7	1070.48	2	37.88	F16:5500	6	354	369	S-pyridylethylation
18	51	P04003|C4BPA_HUMAN	K.MALEVYK.L	Y	34.67	852.442	-0.2	427.228	2	36.47	F17:5090	4	567	573
18	51	P04003|C4BPA_HUMAN	K.RLMQC(+105.06)LPNPEDVKMALEVYK.L	Y	29.34	2481.26	0	621.322	4	55.06	F16:8778	1	554	573	S-pyridylethylation
18	51	P04003|C4BPA_HUMAN	K.RLM(+15.99)QC(+105.06)LPNPEDVK.M	Y	27.71	1662.82	-0.9	555.281	3	36.31	F16:5185	2	554	566	Oxidation (M); S-pyridylethylation
18	51	P04003|C4BPA_HUMAN	R.GVGWSHPLPQCEIVK.C	Y	20.48	1648.84	-4.2	825.424	2	45.75	F16:7050	1	160	174
56	47	P69905|HBA_HUMAN	K.TYFPHFDLSHGSAQVK.G	Y	137.09	1832.88	-0.1	917.449	2	44.38	F19:4750	7	42	57
56	47	P69905|HBA_HUMAN	K.VGAHAGEYGAEALER.M	Y	133.41	1528.73	0.1	765.371	2	29.84	F19:2976	20	18	32
56	47	P69905|HBA_HUMAN	R.MFLSFPTTK.T	Y	82.74	1070.55	-1	536.28	2	52.89	F19:5741	2	33	41
56	47	P69905|HBA_HUMAN	R.M(+15.99)FLSFPTTK.T	Y	65.14	1086.54	-0.6	544.278	2	53.29	F19:5792	8	33	41	Oxidation (M)
56	47	P69905|HBA_HUMAN	M.VLSPADKTNVK.A	Y	63.72	1170.66	-1.4	586.337	2	17.57	F19:1447	19	2	12
56	47	P69905|HBA_HUMAN	K.TNVKAAWGK.V	Y	36.24	973.534	-0.8	487.774	2	20.67	F19:1803	2	9	17
39	48	P10643|CO7_HUMAN	K.NVVYTC(+105.06)NEGYSLIGNPVAR.C	Y	98.99	2173.06	-0.5	1087.54	2	45.8	F17:6748	7	594	612	S-pyridylethylation
39	48	P10643|CO7_HUMAN	R.YSAWAESVTNLPQVIK.Q	Y	73.86	1804.94	-0.4	903.475	2	58.55	F17:8825	6	403	418
39	48	P10643|CO7_HUMAN	K.MPYEC(+105.06)GPSLDVC(+105.06)AQDER.S	Y	68.69	2121.9	1.4	1061.96	2	36.72	F16:5271	6	717	733	S-pyridylethylation
39	48	P10643|CO7_HUMAN	R.SC(+105.06)VGETTESTQC(+105.06)EDEELEHLR.L	Y	66.18	2604.11	-1.3	869.043	3	34.23	F17:4703	8	534	554	S-pyridylethylation
39	48	P10643|CO7_HUMAN	R.GQSISVTSIRPC(+105.06)AAETQ	Y	61.29	1851.91	1.9	926.966	2	36	F16:5126	4	827	843	S-pyridylethylation
39	48	P10643|CO7_HUMAN	R.SVAVYGQYGGQPC(+105.06)VGNAFETQSC(+105.06)EPTR.G	Y	60.86	3057.38	2.3	1020.13	3	39.63	F16:5851	5	51	77	S-pyridylethylation
39	48	P10643|CO7_HUMAN	R.GGGAGFISGLSYLELDNPAGNKR.R	Y	56.61	2292.15	-1.6	765.056	3	59.4	F16:9542	1	379	401
39	48	P10643|CO7_HUMAN	K.MHVLHC(+105.06)QGR.N	Y	56.06	1184.57	-1.6	593.291	2	9.16	F16:907	4	745	753	S-pyridylethylation
39	48	P10643|CO7_HUMAN	K.IAC(+105.06)VLPVLMDGIQSHPQKPFYTVGEK.V	Y	54.8	2974.54	0.6	744.644	4	55.44	F16:8844	2	629	654	S-pyridylethylation
39	48	P10643|CO7_HUMAN	R.DSC(+105.06)TLPASAEK.A	Y	54.62	1225.56	0.7	613.79	2	19.97	F16:2091	12	761	771	S-pyridylethylation
39	48	P10643|CO7_HUMAN	R.GGGAGFISGLSYLELDNPAGNK.R	Y	49.76	2136.05	2.6	713.025	3	63.7	F17:9609	2	379	400
39	48	P10643|CO7_HUMAN	K.M(+15.99)HVLHC(+105.06)QGR.N	Y	43.34	1200.56	-2	601.288	2	9.16	F16:906	2	745	753	Oxidation (M); S-pyridylethylation
39	48	P10643|CO7_HUMAN	K.M(+15.99)PYEC(+105.06)GPSLDVC(+105.06)AQDER.S	Y	43.29	2137.89	-0.6	713.637	3	36.92	F17:5170	2	717	733	Oxidation (M); S-pyridylethylation
39	48	P10643|CO7_HUMAN	R.GC(+105.06)PTEEGC(+105.06)GER.F	Y	43.19	1346.54	-0.1	674.276	2	9.15	F19:763	3	78	88	S-pyridylethylation
39	48	P10643|CO7_HUMAN	R.GGGAGFISGLSYLELDNPAGNKRR.Y	Y	42.43	2448.25	-0.7	613.07	4	55.73	F16:8893	4	379	402
39	48	P10643|CO7_HUMAN	K.AC(+105.06)GAC(+105.06)PLWGK.C	Y	38.98	1214.57	-0.3	405.865	3	28.45	F16:3627	2	772	781	S-pyridylethylation
39	48	P10643|CO7_HUMAN	K.AASGTQNNVLRGEPFIR.G	Y	36.47	1828.95	1.9	915.486	2	41.34	F16:6189	2	362	378
39	48	P10643|CO7_HUMAN	R.C(+105.06)RGQSISVTSIRPC(+105.06)AAETQ	Y	33.44	2216.08	0.4	739.702	3	30.39	F16:4003	4	825	843	S-pyridylethylation
39	48	P10643|CO7_HUMAN	K.LTPLYELVK.E	Y	31.69	1074.63	-0.7	538.323	2	54.04	F16:8590	2	421	429
39	48	P10643|CO7_HUMAN	R.VLFYVDSEKLK.Q	Y	31.01	1339.74	-0.8	447.587	3	44.28	F16:6766	2	315	325
39	48	P10643|CO7_HUMAN	R.GEPFIR.G	Y	26.87	717.381	1	359.698	2	29.58	F16:3853	2	373	378
39	48	P10643|CO7_HUMAN	R.ILPLTVC(+105.06)K.M	Y	26.07	990.594	-2.3	496.303	2	36.31	F17:5062	5	737	744	S-pyridylethylation
34	43	P04004|VTNC_HUMAN	R.SIAQYWLGC(+105.06)PAPGHL	Y	93.98	1716.84	1.1	859.431	2	54.55	F19:5940	14	464	478	S-pyridylethylation
34	43	P04004|VTNC_HUMAN	R.DVWGIEGPIDAAFTR.I	Y	83.1	1645.81	-0.4	823.912	2	66.44	F17:10022	5	198	212
34	43	P04004|VTNC_HUMAN	R.IYISGMAPRPSLAK.K	Y	70.22	1502.83	-0.2	752.421	2	39.42	F16:5809	5	354	367
34	43	P04004|VTNC_HUMAN	R.FEDGVLDPDYPR.N	Y	67.33	1421.65	1.2	711.831	2	45.22	F17:6656	4	230	241
34	43	P04004|VTNC_HUMAN	K.LIRDVWGIEGPIDAAFTR.I	Y	65.06	2028.08	0.4	677.034	3	62.9	F17:9488	3	195	212
34	43	P04004|VTNC_HUMAN	R.DWHGVPGQVDAAMAGR.I	Y	58.91	1665.77	1.4	833.893	2	44.58	F16:6825	5	338	353
34	43	P04004|VTNC_HUMAN	R.IYISGM(+15.99)APRPSLAK.K	Y	58.66	1518.82	-0.9	760.418	2	39.37	F16:5798	11	354	367	Oxidation (M)
34	43	P04004|VTNC_HUMAN	R.VDTVDPPYPR.S	Y	55.95	1157.57	3.2	579.795	2	32.11	F19:3270	2	454	463
34	43	P04004|VTNC_HUMAN	R.GQYC(+105.06)YELDEKAVRPGYPK.L	Y	55.84	2220.07	-2.2	741.028	3	33.78	F17:4627	6	177	194	S-pyridylethylation
34	43	P04004|VTNC_HUMAN	R.C(+105.06)TEGFNVDKK.C	Y	55.66	1244.59	-1.4	415.869	3	17.5	F17:1786	5	28	37	S-pyridylethylation
34	43	P04004|VTNC_HUMAN	R.GQYC(+105.06)YELDEK.A	Y	51.64	1351.58	-0.5	676.795	2	29.61	F17:3849	6	177	186	S-pyridylethylation
34	43	P04004|VTNC_HUMAN	R.TSAGTRQPQFISR.D	Y	48.63	1447.75	-0.2	724.884	2	26	F17:3215	7	325	337
34	43	P04004|VTNC_HUMAN	R.RVDTVDPPYPR.S	Y	46.86	1313.67	0.1	438.898	3	28.48	F18:3144	14	453	463
34	43	P04004|VTNC_HUMAN	K.TYLFK.G	Y	34.1	670.369	0.1	336.192	2	34.83	F17:4801	3	219	223
34	43	P04004|VTNC_HUMAN	R.CTEGFNVDKK.C	Y	32.69	1139.53	-1.8	570.77	2	22.28	F16:2456	1	28	37
34	43	P04004|VTNC_HUMAN	R.QPQFISR.D	Y	32.13	874.466	1	438.241	2	27.26	F16:3392	5	331	337
34	43	P04004|VTNC_HUMAN	R.VYFFK.G	Y	31.89	702.374	0.3	352.194	2	42.42	F17:6166	3	271	275
34	43	P04004|VTNC_HUMAN	R.INC(+105.06)QGK.T	Y	23	766.38	0.7	384.197	2	5.07	F17:436	1	213	218	S-pyridylethylation
34	43	P04004|VTNC_HUMAN	R.TRRVDTVDPPYPR.S	Y	22.39	1570.82	-0.8	786.417	2	26.68	F19:2554	6	451	463
34	43	P04004|VTNC_HUMAN	R.C(+105.06)TEGFNVDK.K	Y	22.31	1116.49	-1	559.252	2	22.53	F17:2617	3	28	36	S-pyridylethylation
73	55	P02743|SAMP_HUMAN	K.IVLGQEQDSYGGKFDR.S	Y	126.5	1810.88	0.1	906.45	2	35.98	F19:3752	11	150	165
73	55	P02743|SAMP_HUMAN	K.IVLGQEQDSYGGK.F	Y	82.37	1392.69	-0.1	697.351	2	31.29	F18:3593	2	150	162
73	55	P02743|SAMP_HUMAN	K.GLRQGYFVEAQPK.I	Y	73.15	1491.78	0.6	746.899	2	33.28	F18:3908	4	137	149
73	55	P02743|SAMP_HUMAN	R.AYSLFSYNTQGR.D	Y	69.96	1405.66	0.3	703.839	2	46.72	F18:5888	2	65	76
73	55	P02743|SAMP_HUMAN	R.QGYFVEAQPK.I	Y	62.04	1165.58	0.4	583.796	2	32.84	F18:3841	4	140	149
73	55	P02743|SAMP_HUMAN	R.VGEYSLYIGR.H	Y	58.41	1155.59	-0.2	578.803	2	43.73	F18:5475	4	87	96
73	55	P02743|SAMP_HUMAN	K.VFVFPR.E	Y	39.34	763.438	0.2	382.726	2	44.3	F18:5555	2	27	32
73	55	P02743|SAMP_HUMAN	R.GYVIIKPLVWV	Y	31.07	1285.78	2.1	643.899	2	67.45	F18:8570	4	213	223
72	45	P25311|ZA2G_HUMAN	K.HVEDVPAFQALGSLNDLQFFR.Y	Y	100.6	2402.2	2.6	1202.11	2	71.76	F17:10764	2	40	60
72	45	P25311|ZA2G_HUMAN	R.YSLTYIYTGLSK.H	Y	79.6	1407.73	0.2	704.872	2	54.68	F17:8186	2	28	39
72	45	P25311|ZA2G_HUMAN	K.NILDRQDPPSVVVTSHQAPGEK.K	Y	77.01	2386.22	-1	796.415	3	36.33	F17:5065	2	199	220
72	45	P25311|ZA2G_HUMAN	K.QKWEAEPVYVQR.A	Y	62.09	1531.78	-0.3	766.896	2	34.47	F17:4743	4	166	177
72	45	P25311|ZA2G_HUMAN	R.AKAYLEEEC(+105.06)PATLR.K	Y	60.72	1697.84	0.4	566.956	3	32.2	F17:4321	2	178	191	S-pyridylethylation
72	45	P25311|ZA2G_HUMAN	K.YYYDGKDYIEFNKEIPAWVPFDPAAQITK.Q	Y	59.74	3480.69	2.8	1161.24	3	64.68	F17:9759	2	137	165
72	45	P25311|ZA2G_HUMAN	R.QVEGMEDWKQDSQLQK.A	Y	55.76	1947.9	0.4	974.957	2	36.85	F17:5159	3	76	91
72	45	P25311|ZA2G_HUMAN	R.AGEVQEPELR.G	N	53.31	1126.56	-0.7	564.288	2	28.7	F17:3682	2	242	251
72	45	P25311|ZA2G_HUMAN	R.AKAYLEEEC(+105.06)PATLRK.Y	Y	52.08	1825.94	-0.7	609.653	3	27.95	F17:3551	4	178	192	S-pyridylethylation
72	45	P25311|ZA2G_HUMAN	K.YSKNILDRQDPPSVVVTSHQAPGEK.K	Y	50.14	2764.41	-1.2	692.11	4	34.11	F17:4683	1	196	220
72	45	P25311|ZA2G_HUMAN	K.NILDRQDPPSVVVTSHQAPGEKK.K	Y	35.41	2514.32	-1.4	629.586	4	33.69	F17:4611	1	199	221
72	45	P25311|ZA2G_HUMAN	R.QDPPSVVVTSHQAPGEK.K	Y	34.63	1774.88	-0.4	592.635	3	28.16	F17:3587	1	204	220
72	45	P25311|ZA2G_HUMAN	K.NILDRQDPPSVVVTSHQAPGEKKK.L	Y	29.99	2642.41	-1.6	661.61	4	31.32	F17:4162	1	199	222
72	45	P25311|ZA2G_HUMAN	K.AYLEEEC(+105.06)PATLR.K	Y	27.94	1498.71	-1.1	500.577	3	34.96	F17:4822	2	180	191	S-pyridylethylation
72	45	P25311|ZA2G_HUMAN	K.AYLEEEC(+105.06)PATLRK.Y	Y	21.06	1626.81	-1.3	543.276	3	30.36	F17:3992	2	180	192	S-pyridylethylation
46	66	P01861|IGHG4_HUMAN	K.TTPPVLDSDGSFFLYSR.L	Y	97.93	1900.92	1.4	951.469	2	59.83	F19:6580	4	273	289
46	66	P01861|IGHG4_HUMAN	K.GFYPSDIAVEWESNGQPENNYK.T	N	88.79	2543.12	1.9	1272.57	2	57.3	F18:7330	1	251	272
46	66	P01861|IGHG4_HUMAN	K.VSNKGLPSSIEK.T	Y	74.18	1257.69	0.2	629.854	2	24.48	F18:2539	7	203	214
46	66	P01861|IGHG4_HUMAN	K.YGPPC(+105.06)PSC(+105.06)PAPEFLGGPSVFLFPPKPK.D	Y	65.29	3038.52	1	1013.85	3	57.91	F17:8722	6	102	128	S-pyridylethylation
46	66	P01861|IGHG4_HUMAN	R.VVSVLTVLHQDWLNGKEYK.C	N	60.52	2227.2	-0.4	743.407	3	60.9	F17:9186	5	182	200
46	66	P01861|IGHG4_HUMAN	K.NQVSLTC(+105.06)LVK.G	N	58.09	1208.66	1	605.337	2	37.86	F19:3983	8	241	250	S-pyridylethylation
46	66	P01861|IGHG4_HUMAN	K.GPSVFPLAPC(+105.06)SR.S	N	57.24	1334.68	-0.8	668.347	2	41.72	F16:6264	8	5	16	S-pyridylethylation
46	66	P01861|IGHG4_HUMAN	R.STSESTAALGC(+105.06)LVK.D	N	54.6	1470.74	-0.8	736.376	2	37.07	F17:5198	8	17	30	S-pyridylethylation
46	66	P01861|IGHG4_HUMAN	K.TYTC(+105.06)NVDHKPSNTK.V	Y	49.44	1711.8	0.6	856.907	2	9.01	F16:877	10	80	93	S-pyridylethylation
46	66	P01861|IGHG4_HUMAN	R.LTVDKSR.W	N	35.56	817.466	1.4	409.741	2	7.91	F17:745	4	290	296
46	66	P01861|IGHG4_HUMAN	K.DTLMISR.T	N	35.29	834.427	0.8	418.221	2	32.34	F16:4392	3	129	135
46	66	P01861|IGHG4_HUMAN	K.DTLM(+15.99)ISR.T	N	34.73	850.422	0	426.218	2	27.8	F17:3523	5	129	135	Oxidation (M)
46	66	P01861|IGHG4_HUMAN	K.TYTC(+105.06)NVDHKPSNTKVDKR.V	Y	33.5	2210.09	1.4	553.531	4	9.34	F17:923	4	80	97	S-pyridylethylation
46	66	P01861|IGHG4_HUMAN	K.AKGQPR.E	N	22.34	655.376	0.1	328.696	2	3.36	F17:252	2	219	224
46	66	P01861|IGHG4_HUMAN	K.TYTC(+105.06)NVDHKPSNTKVDK.R	Y	21.91	2053.99	2.8	685.672	3	16.28	F17:1608	1	80	96	S-pyridylethylation
33	69	P01860|IGHG3_HUMAN	R.STSGGTAALGC(+105.06)LVK.D	N	89.3	1368.71	0.1	685.361	2	35.4	F19:3678	13	17	30	S-pyridylethylation
33	69	P01860|IGHG3_HUMAN	K.WYVDGVEVHNAK.T	Y	77.73	1415.68	-1.1	708.848	2	38.49	F17:5469	2	207	218
33	69	P01860|IGHG3_HUMAN	K.VSNKALPAPIEK.T	N	77.39	1265.73	0.4	633.875	2	26.49	F18:2846	10	253	264
33	69	P01860|IGHG3_HUMAN	K.ALPAPIEKTISK.T	N	73.5	1266.75	-0.3	634.384	2	36.03	F18:4328	7	257	268
33	69	P01860|IGHG3_HUMAN	R.TPEVTC(+105.06)VVVDVSHEDPEVQFK.W	Y	71.62	2461.18	-1.1	821.401	3	48.84	F17:7251	2	186	206	S-pyridylethylation
33	69	P01860|IGHG3_HUMAN	K.TPLGDTTHTC(+105.06)PR.C	Y	60.64	1402.67	-0.1	702.34	2	20.03	F17:2178	4	102	113	S-pyridylethylation
33	69	P01860|IGHG3_HUMAN	R.VVSVLTVLHQDWLNGKEYK.C	N	60.52	2227.2	-0.4	743.407	3	60.9	F17:9186	5	232	250
33	69	P01860|IGHG3_HUMAN	K.NQVSLTC(+105.06)LVK.G	N	58.09	1208.66	1	605.337	2	37.86	F19:3983	8	291	300	S-pyridylethylation
33	69	P01860|IGHG3_HUMAN	K.GPSVFPLAPC(+105.06)SR.S	N	57.24	1334.68	-0.8	668.347	2	41.72	F16:6264	8	5	16	S-pyridylethylation
33	69	P01860|IGHG3_HUMAN	K.SC(+105.06)DTPPPC(+105.06)PR.C	Y	56.39	1281.56	-0.6	641.789	2	9.5	F17:959	9	119	128	S-pyridylethylation
33	69	P01860|IGHG3_HUMAN	R.VELKTPLGDTTHTC(+105.06)PR.C	Y	56.24	1871.96	0.6	624.993	3	30.67	F17:4052	6	98	113	S-pyridylethylation
33	69	P01860|IGHG3_HUMAN	K.LTVDKSR.W	N	35.56	817.466	1.4	409.741	2	7.91	F17:745	4	340	346
33	69	P01860|IGHG3_HUMAN	K.DTLMISR.T	N	35.29	834.427	0.8	418.221	2	32.34	F16:4392	3	179	185
33	69	P01860|IGHG3_HUMAN	K.DTLM(+15.99)ISR.T	N	34.73	850.422	0	426.218	2	27.8	F17:3523	5	179	185	Oxidation (M)
33	69	P01860|IGHG3_HUMAN	R.C(+105.06)PAPELLGGPSVFLFPPKPK.D	Y	32.82	2198.2	-0.2	550.556	4	58.01	F17:8737	5	159	178	S-pyridylethylation
33	69	P01860|IGHG3_HUMAN	K.GPSVFPLAPCSRSTSGGTAALGC(+158.13)LVK.D	Y	21.42	2633.39	0.9	878.805	3	47.67	F19:5123	3	5	30	SL-HNE+Delta H(2) (C)
33	69	P01860|IGHG3_HUMAN	K.ALPAPIEK.T	N	21.06	837.496	0.6	419.755	2	29.54	F16:3846	6	257	264
59	108	P01591|IGJ_HUMAN	K.C(+105.06)YTAVVPLVYGGETK.M	Y	111.37	1703.86	0.3	852.937	2	44.1	F18:5525	8	131	145	S-pyridylethylation
59	108	P01591|IGJ_HUMAN	K.M(+15.99)VETALTPDAC(+105.06)YPD	Y	86.1	1645.7	-1	823.857	2	42.33	F18:5272	8	146	159	Oxidation (M); S-pyridylethylation
59	108	P01591|IGJ_HUMAN	K.MVETALTPDAC(+105.06)YPD	Y	85.1	1629.71	-0.2	815.86	2	42.39	F18:5281	6	146	159	S-pyridylethylation
59	108	P01591|IGJ_HUMAN	R.IIRSSEDPNEDIVER.N	Y	79.85	1770.87	-0.6	886.444	2	28.54	F18:3154	4	44	58
59	108	P01591|IGJ_HUMAN	K.C(+105.06)YTAVVPLVYGGETKMVETALTPDAC(+105.06)YPD	Y	69.93	3315.55	-1.5	1106.19	3	60.51	F18:7747	1	131	159	S-pyridylethylation
59	108	P01591|IGJ_HUMAN	R.FVYHLSDLC(+105.06)K.K	Y	66.86	1328.66	0	443.894	3	39.75	F18:4898	6	83	92	S-pyridylethylation
59	108	P01591|IGJ_HUMAN	R.SSEDPNEDIVERNIR.I	Y	64.56	1771.83	-0.1	886.924	2	33.19	F18:3894	4	47	61
59	108	P01591|IGJ_HUMAN	K.C(+105.06)YTAVVPLVYGGETKM(+15.99)VETALTPDAC(+105.06)YPD	Y	62.06	3331.55	-1.9	1111.52	3	60.67	F18:7768	2	131	159	S-pyridylethylation; Oxidation (M)
59	108	P01591|IGJ_HUMAN	R.SSEDPNEDIVER.N	Y	59.8	1388.61	-0.6	695.31	2	26.23	F18:2809	6	47	58
59	108	P01591|IGJ_HUMAN	R.IIVPLNNR.E	Y	26.22	937.571	0	469.793	2	36.31	F18:4373	1	62	69
59	108	P01591|IGJ_HUMAN	R.TRFVYHLSDLC(+105.06)K.K	Y	23.63	1585.81	-0.2	529.61	3	38.27	F18:4668	2	81	92	S-pyridylethylation
59	108	P01591|IGJ_HUMAN	R.IIRSSEDPNEDIVERNIR.I	Y	20.94	2154.1	-1	539.532	4	33.41	F18:3929	2	44	61
47	20	P05155|IC1_HUMAN	R.LVLLNAIYLSAK.W	Y	81.39	1316.81	-2.4	659.409	2	63.96	F20:5458	5	287	298
47	20	P05155|IC1_HUMAN	R.LEDMEQALSPSVFK.A	Y	72.86	1592.78	1.1	797.396	2	54.3	F16:8636	2	367	380
47	20	P05155|IC1_HUMAN	K.HRLEDM(+15.99)EQALSPSVFK.A	Y	63.53	1901.93	-0.7	634.984	3	47.95	F16:7467	1	365	380	Oxidation (M)
47	20	P05155|IC1_HUMAN	K.VTTSQDMLSIMEK.L	Y	62.65	1481.71	1.3	741.864	2	50.67	F16:7977	2	403	415
47	20	P05155|IC1_HUMAN	K.HRLEDMEQALSPSVFK.A	Y	61.74	1885.94	0.3	629.653	3	47.94	F16:7465	2	365	380
47	20	P05155|IC1_HUMAN	K.AIMEKLEMSKFQPTLLTLPR.I	Y	57.68	2345.29	0.6	782.769	3	58.22	F16:9341	2	381	400
47	20	P05155|IC1_HUMAN	R.TLYSSSPR.V	Y	55	909.456	-0.5	455.735	2	20.7	F17:2292	14	242	249
47	20	P05155|IC1_HUMAN	K.GVTSVSQIFHSPDLAIR.D	Y	53.29	1825.97	0.4	609.664	3	54	F16:8582	3	217	233
47	20	P05155|IC1_HUMAN	K.LYHAFSAMK.K	Y	52.53	1066.53	-0.6	534.27	2	31.47	F16:4213	4	153	161
47	20	P05155|IC1_HUMAN	K.VETNMAFSPFSIASLLTQVLLGAGENTK.T	Y	51.18	2937.52	3.4	980.182	3	99.04	F16:14918	3	163	190
47	20	P05155|IC1_HUMAN	K.AIMEKLEMSK.F	Y	51.07	1178.6	-1.2	590.308	2	34	F16:4719	1	381	390
47	20	P05155|IC1_HUMAN	K.NSVIKVPM(+15.99)MNSK.K	Y	50.84	1362.7	-0.7	682.357	2	38.66	F16:5656	1	317	328	Oxidation (M)
47	20	P05155|IC1_HUMAN	R.LLDSLPSDTRLVLLNAIYLSAK.W	Y	49.52	2414.38	0.9	805.801	3	75.31	F16:11993	9	277	298
47	20	P05155|IC1_HUMAN	K.TNLESILSYPK.D	Y	48.36	1263.67	1	632.843	2	53.67	F16:8526	2	191	201
47	20	P05155|IC1_HUMAN	K.LYHAFSAM(+15.99)K.K	Y	48.08	1082.52	-0.7	542.268	2	31.34	F16:4186	4	153	161	Oxidation (M)
47	20	P05155|IC1_HUMAN	K.NSVIKVPM(+15.99)M(+15.99)NSK.K	Y	48	1378.69	-1.5	690.354	2	38.54	F16:5631	3	317	328	Oxidation (M)
47	20	P05155|IC1_HUMAN	R.VYDPRA	Y	44.01	719.36	1.1	360.688	2	17.81	F19:1475	2	495	500
47	20	P05155|IC1_HUMAN	K.TNLESILSYPKDFTC(+105.06)VHQALK.G	Y	42.57	2511.28	0	838.102	3	54.16	F16:8612	3	191	211	S-pyridylethylation
47	20	P05155|IC1_HUMAN	K.TNLESILSYPKDFTC(+105.06)VHQALKGFTTK.G	Y	41.3	3045.56	1.6	1016.2	3	58.86	F16:9452	3	191	216	S-pyridylethylation
47	20	P05155|IC1_HUMAN	R.LLDSLPSDTR.L	Y	40.71	1115.58	-1.6	558.798	2	36.55	F16:5233	2	277	286
47	20	P05155|IC1_HUMAN	K.AIM(+15.99)EKLEM(+15.99)SK.F	Y	35	1210.59	-0.2	606.304	2	33.94	F16:4706	3	381	390	Oxidation (M)
47	20	P05155|IC1_HUMAN	K.NTNNKISR.L	Y	31.8	945.499	-0.5	473.757	2	4.22	F16:341	2	269	276
47	20	P05155|IC1_HUMAN	K.FQPTLLTLPR.I	Y	31.02	1184.69	-0.5	593.353	2	54.42	F16:8660	3	391	400
47	20	P05155|IC1_HUMAN	R.MEPFHFK.N	Y	29.78	934.437	0.1	468.226	2	37.26	F18:4513	1	310	316
47	20	P05155|IC1_HUMAN	K.KYPVAHFIDQTLK.A	Y	28.37	1558.85	-1.7	520.623	3	42.25	F16:6369	1	329	341
47	20	P05155|IC1_HUMAN	K.TRM(+15.99)EPFHFK.N	Y	28.27	1207.58	-0.1	403.534	3	33.4	F16:4602	2	308	316	Oxidation (M)
47	20	P05155|IC1_HUMAN	K.VPM(+15.99)M(+15.99)NSK.K	Y	21.37	837.372	0.1	419.693	2	20.25	F16:2136	2	322	328	Oxidation (M)
54	46	P03952|KLKB1_HUMAN	R.IAYGTQGSSGYSLR.L	Y	105.21	1458.71	-1.3	730.361	2	34.73	F20:2865	6	360	373
54	46	P03952|KLKB1_HUMAN	K.VAEYMDWILEK.T	Y	69.92	1395.67	0.9	698.845	2	61.41	F17:9261	3	614	624
54	46	P03952|KLKB1_HUMAN	K.DSVTGTLPK.V	Y	56.69	916.487	0.1	459.251	2	27.84	F17:3531	2	81	89
54	46	P03952|KLKB1_HUMAN	R.YQDYKITQR.M	Y	53.93	1213.61	0.3	607.812	2	22.42	F16:2478	2	552	560
54	46	P03952|KLKB1_HUMAN	R.C(+105.06)LLFSFLPASSINDMEKR.F	Y	52.89	2175.09	1.6	726.037	3	61.57	F17:9284	4	57	74	S-pyridylethylation
54	46	P03952|KLKB1_HUMAN	K.VAEYMDWILEKTQSSDGK.A	Y	52.3	2098.99	0.6	700.67	3	57.41	F16:9194	2	614	631
54	46	P03952|KLKB1_HUMAN	K.EKGEIQNILQK.V	Y	46.94	1298.72	-1.5	650.366	2	34.61	F16:4836	4	527	537
54	46	P03952|KLKB1_HUMAN	R.LC(+105.06)NTGDNSVC(+105.06)TTK.T	Y	42.25	1564.7	-1.2	522.574	3	9.44	F17:945	1	374	386	S-pyridylethylation
54	46	P03952|KLKB1_HUMAN	K.YSPGGTPTAIK.V	Y	41.68	1090.57	-3.2	546.288	2	26.55	F17:3309	2	170	180
54	46	P03952|KLKB1_HUMAN	R.GGDVASM(+15.99)YTPNAQYC(+105.06)QM(+15.99)R.C	Y	41.54	2127.88	0.8	710.302	3	39.14	F17:5581	2	33	50	Oxidation (M); S-pyridylethylation
54	46	P03952|KLKB1_HUMAN	R.LSMDGSPTR.I	Y	39.28	962.449	-1.3	482.231	2	23.68	F19:2167	2	351	359
54	46	P03952|KLKB1_HUMAN	R.LVGITSWGEGC(+105.06)AR.R	Y	38.7	1452.72	-2	485.246	3	41.67	F16:6255	1	592	604	S-pyridylethylation
54	46	P03952|KLKB1_HUMAN	K.GVNVC(+105.06)QETC(+105.06)TK.M	Y	35.59	1390.64	1.2	696.327	2	18.34	F17:1914	4	314	324	S-pyridylethylation
54	46	P03952|KLKB1_HUMAN	R.GGDVASMYTPNAQYC(+105.06)QMR.C	Y	32.04	2095.89	-0.7	699.637	3	39.15	F17:5583	2	33	50	S-pyridylethylation
54	46	P03952|KLKB1_HUMAN	K.VNIPLVTNEEC(+105.06)QK.R	Y	29.14	1590.81	-0.6	531.276	3	39.2	F16:5764	2	538	550	S-pyridylethylation
54	46	P03952|KLKB1_HUMAN	R.VLTPDAFVC(+105.06)R.T	Y	27.76	1224.63	-0.6	409.218	3	41.87	F17:6069	1	219	228	S-pyridylethylation
54	46	P03952|KLKB1_HUMAN	K.VAEYMDWILEKTQSSDGKAQMQSPA	Y	24.91	2812.3	0.9	938.443	3	57.88	F16:9277	2	614	638
52	60	P35542|SAA4_HUMAN	R.SFFKEALQGVGDMGR.A	Y	112.64	1640.8	-0.4	821.406	2	52.46	F19:5695	8	23	37
52	60	P35542|SAA4_HUMAN	R.SFFKEALQGVGDM(+15.99)GR.A	Y	102.75	1656.79	1.8	829.405	2	52.32	F18:6658	12	23	37	Oxidation (M)
52	60	P35542|SAA4_HUMAN	K.EALQGVGDM(+15.99)GR.A	Y	88.79	1147.53	-0.4	574.772	2	32.57	F19:3327	4	27	37	Oxidation (M)
52	60	P35542|SAA4_HUMAN	K.EALQGVGDMGR.A	Y	87.75	1131.53	1.3	566.775	2	32.69	F19:3346	9	27	37
52	60	P35542|SAA4_HUMAN	R.GPGGVWAAK.L	Y	80.77	841.445	0	421.73	2	28.01	F18:3066	2	66	74
52	60	P35542|SAA4_HUMAN	R.GNYDAAQRGPGGVWAAK.L	Y	61.69	1716.83	2.6	573.287	3	32.99	F19:3388	3	58	74
52	60	P35542|SAA4_HUMAN	K.SNEKAEEWGR.S	Y	60.07	1204.55	-1.4	603.28	2	20.26	F19:1752	4	104	113
52	60	P35542|SAA4_HUMAN	R.SGKDPDRFRPDGLPK.K	Y	46.72	1683.87	1	562.298	3	29.12	F19:2879	11	114	128
52	60	P35542|SAA4_HUMAN	R.YLYAR.G	Y	33.72	684.36	-0.2	343.187	2	23.64	F19:2160	2	53	57
52	60	P35542|SAA4_HUMAN	R.SGKDPDRFRPDGLPKKY	Y	30.91	1975.03	-1	659.349	3	28.16	F18:3092	8	114	130
41	30	P02768|ALBU_HUMAN	K.VFDEFKPLVEEPQNLIK.Q	Y	81.61	2044.09	2.6	682.372	3	58.07	F18:7430	8	397	413
41	30	P02768|ALBU_HUMAN	K.KVPQVSTPTLVEVSR.N	Y	72.14	1638.93	0.5	820.473	2	40.12	F17:5758	5	438	452
41	30	P02768|ALBU_HUMAN	K.YIC(+105.06)ENQDSISSK.L	Y	69.61	1490.67	0.2	746.343	2	22.93	F17:2683	10	287	298	S-pyridylethylation
41	30	P02768|ALBU_HUMAN	K.AVMDDFAAFVEK.C	Y	66.78	1341.63	0.6	671.821	2	59.6	F16:9577	4	570	581
41	30	P02768|ALBU_HUMAN	K.TC(+105.06)VADESAENC(+105.06)DK.S	Y	61.78	1593.64	-0.2	797.829	2	9.16	F16:908	1	76	88	S-pyridylethylation
41	30	P02768|ALBU_HUMAN	K.LVAASQAALGL	Y	59.43	1012.59	0.8	507.303	2	50.87	F18:6461	21	599	609
41	30	P02768|ALBU_HUMAN	K.ATKEQLKAVMDDFAAFVEK.C	Y	58.92	2140.09	-1.1	714.369	3	66.09	F16:10617	2	563	581
41	30	P02768|ALBU_HUMAN	K.AEFAEVSKLVTDLTK.V	Y	55.54	1649.89	-0.1	550.97	3	63.13	F16:10165	4	250	264
41	30	P02768|ALBU_HUMAN	K.QEPERNEC(+105.06)FLQHKDDNPNLPR.L	Y	48.94	2683.26	-2.2	895.424	3	28.73	F16:3687	4	118	138	S-pyridylethylation
41	30	P02768|ALBU_HUMAN	K.LDELRDEGKASSAK.Q	Y	47.22	1517.77	-1.8	506.929	3	17.39	F17:1772	2	206	219
41	30	P02768|ALBU_HUMAN	K.AEFAEVSK.L	Y	44.29	879.434	-0.2	440.724	2	24	F16:2760	2	250	257
41	30	P02768|ALBU_HUMAN	K.SHC(+105.06)IAEVENDEMPADLPSLAADFVESKDVC(+105.06)K.N	Y	44.03	3571.63	0.3	893.915	4	58.97	F16:9471	1	311	341	S-pyridylethylation
41	30	P02768|ALBU_HUMAN	K.SHC(+105.06)IAEVENDEMPADLPSLAADFVESK.D	Y	38.42	3021.37	1.4	1008.13	3	63.16	F17:9527	4	311	337	S-pyridylethylation
41	30	P02768|ALBU_HUMAN	K.ADDKETC(+105.06)FAEEGKK.L	Y	37.58	1674.76	0.1	838.385	2	16.19	F17:1596	4	585	598	S-pyridylethylation
41	30	P02768|ALBU_HUMAN	K.HKPKATKEQLK.A	Y	33.22	1306.77	-0.4	654.393	2	7.58	F16:671	2	559	569
41	30	P02768|ALBU_HUMAN	K.RMPC(+105.06)AEDYLSVVLNQLC(+105.06)VLHEK.T	Y	29.9	2769.38	1.5	693.353	4	67.15	F16:10787	1	469	490	S-pyridylethylation
41	30	P02768|ALBU_HUMAN	K.KQTALVELVK.H	Y	25.38	1127.69	-0.5	564.853	2	36.17	F16:5158	2	549	558
41	30	P02768|ALBU_HUMAN	R.MPC(+105.06)AEDYLSVVLNQLC(+105.06)VLHEK.T	Y	24.31	2613.28	-0.2	654.327	4	69.88	F16:11205	2	470	490	S-pyridylethylation
41	30	P02768|ALBU_HUMAN	K.C(+105.06)C(+105.06)KHPEAKR.M	Y	23.79	1280.63	-0.8	641.32	2	7.97	F16:719	3	461	469	S-pyridylethylation
41	30	P02768|ALBU_HUMAN	K.AVM(+15.99)DDFAAFVEK.C	Y	20.64	1357.62	0.6	679.819	2	59.84	F16:9621	1	570	581	Oxidation (M)
41	30	P02768|ALBU_HUMAN	K.C(+105.06)C(+105.06)KHPEAK.R	Y	20.24	1124.53	-1.3	563.269	2	7.5	F16:661	3	461	468	S-pyridylethylation
45	23	P00751|CFAB_HUMAN	R.LLQEGQALEYVC(+105.06)PSGFYPYPVQTR.T	Y	82.28	2862.41	-0.5	955.142	3	57.47	F18:7351	9	51	74	S-pyridylethylation
45	23	P00751|CFAB_HUMAN	K.VSEADSSNADWVTK.Q	Y	78.14	1507.68	-0.7	754.846	2	32.14	F16:4354	2	324	337
45	23	P00751|CFAB_HUMAN	K.EKLQDEDLGFL	Y	62.64	1305.65	0.8	653.83	2	54.46	F19:5928	5	754	764
45	23	P00751|CFAB_HUMAN	R.DAQYAPGYDKVKDISEVVTPR.F	Y	62.09	2350.18	0.8	784.401	3	46.74	F16:7232	9	659	679
45	23	P00751|CFAB_HUMAN	R.DFHINLFQVLPWLKEK.L	Y	59.8	2026.1	0.9	676.376	3	74.48	F16:11875	5	740	755
45	23	P00751|CFAB_HUMAN	R.DAQYAPGYDKVK.D	Y	57.14	1353.66	-0.4	677.835	2	24.7	F16:2895	4	659	670
45	23	P00751|CFAB_HUMAN	K.ALFVSEEEKK.L	Y	55.71	1178.62	-0.8	590.316	2	28.5	F17:3646	7	630	639
45	23	P00751|CFAB_HUMAN	K.DISEVVTPR.F	Y	54.48	1014.53	-1.6	508.274	2	35.26	F17:4874	4	671	679
45	23	P00751|CFAB_HUMAN	R.DFHINLFQVLPWLK.E	Y	47.45	1768.97	1.8	885.492	2	81.57	F16:12822	3	740	753
45	23	P00751|CFAB_HUMAN	K.EAGIPEFYDYDVALIK.L	Y	43.6	1841.91	-3	921.959	2	63.4	F18:8110	1	566	581
45	23	P00751|CFAB_HUMAN	R.ALRLPPTTTC(+105.06)QQQKEELLPAQDIK.A	Y	43.22	2825.51	0.1	707.385	4	39.33	F17:5614	4	606	629	S-pyridylethylation
45	23	P00751|CFAB_HUMAN	K.QLNEINYEDHK.L	Y	43.09	1401.65	0.3	701.834	2	26.47	F16:3229	5	338	348
45	23	P00751|CFAB_HUMAN	R.LPPTTTC(+105.06)QQQKEELLPAQDIK.A	Y	39.46	2485.29	-0.2	829.437	3	35.6	F16:5043	2	609	629	S-pyridylethylation
45	23	P00751|CFAB_HUMAN	R.FLC(+105.06)TGGVSPYADPNTC(+105.06)R.G	Y	33.91	2009.91	-1.4	503.485	4	34.83	F16:4880	2	680	696	S-pyridylethylation
45	23	P00751|CFAB_HUMAN	R.DAQYAPGYDK.V	Y	31.93	1126.49	-1.5	564.253	2	22.8	F16:2546	3	659	668
45	23	P00751|CFAB_HUMAN	R.STGSWSTLK.T	Y	31.3	965.482	-0.5	483.748	2	31.09	F16:4137	2	78	86
45	23	P00751|CFAB_HUMAN	R.DFHINLFQVLPWLKEKLQDEDLGFL	Y	28.56	3056.6	1	1019.88	3	88.71	F16:13700	2	740	764
45	23	P00751|CFAB_HUMAN	K.VKDISEVVTPR.F	Y	27.13	1241.7	0.3	414.907	3	30.45	F16:4015	2	669	679
45	23	P00751|CFAB_HUMAN	K.ALFVSEEEKKLTR.K	Y	25.74	1548.85	-0.5	517.291	3	36.57	F16:5238	2	630	642
45	23	P00751|CFAB_HUMAN	K.YGQTIRPIC(+105.06)LPC(+105.06)TEGTTR.A	Y	24.61	2218.1	-1.3	555.532	4	35.92	F16:5110	2	588	605	S-pyridylethylation
45	23	P00751|CFAB_HUMAN	K.QLNEINYEDHKLK.S	Y	22.17	1642.83	1.6	548.619	3	29.26	F16:3794	2	338	350
87	82	P02766|TTHY_HUMAN	R.YTIAALLSPYSYSTTAVVTNPKE	Y	136.57	2488.27	-1.1	1245.14	2	65.8	F19:7258	8	125	147
87	82	P02766|TTHY_HUMAN	K.AADDTWEPFASGK.T	Y	81.46	1393.62	0	697.815	2	45.82	F18:5764	4	56	68
87	82	P02766|TTHY_HUMAN	K.TSESGELHGLTTEEEFVEGIYKVEIDTK.S	Y	74.76	3139.51	-0.5	1047.51	3	64.86	F18:8280	7	69	96
87	82	P02766|TTHY_HUMAN	R.RYTIAALLSPYSYSTTAVVTNPKE	Y	57.17	2644.37	3.3	882.468	3	60.57	F19:6662	4	124	147
87	82	P02766|TTHY_HUMAN	K.VLDAVR.G	N	39.05	671.397	-0.6	336.705	2	21.3	F19:1873	2	36	41
63	39	P13647|K2C5_HUMAN	R.NLDLDSIIAEVK.A	N	86.6	1328.72	1.7	665.368	2	65.37	F19:7205	7	332	343
63	39	P13647|K2C5_HUMAN	K.YEELQQTAGR.H	Y	84.17	1193.57	-0.1	597.791	2	23.79	F19:2182	2	365	374
63	39	P13647|K2C5_HUMAN	R.ISISTSGGSFR.N	Y	73.29	1110.57	-0.2	556.291	2	36.21	F19:3783	4	74	84
63	39	P13647|K2C5_HUMAN	K.AQYEEIANR.S	Y	71.65	1092.52	0.6	547.268	2	25.37	F20:2049	4	344	352
63	39	P13647|K2C5_HUMAN	K.FASFIDKVR.F	N	65.57	1081.59	-0.6	541.803	2	40.11	F19:4256	3	179	187
63	39	P13647|K2C5_HUMAN	R.NLDLDSIIAEVKAQYEEIANR.S	Y	61.74	2403.23	1.6	802.085	3	82.03	F19:8749	2	332	352
63	39	P13647|K2C5_HUMAN	R.SLYNLGGSKR.I	Y	48.3	1093.59	0.2	547.801	2	27.92	F19:2715	2	64	73
63	39	P13647|K2C5_HUMAN	K.LLEGEEC(+105.06)R.L	N	47.77	1052.5	-1.2	527.255	2	20.8	F19:1820	3	473	480	S-pyridylethylation
63	39	P13647|K2C5_HUMAN	K.NKYEDEINKR.T	N	37.47	1307.65	-2.2	654.829	2	20.27	F19:1754	4	256	265
63	39	P13647|K2C5_HUMAN	R.GRLDSELR.N	N	32.98	944.504	0.6	473.26	2	22.69	F19:2052	2	238	245
63	39	P13647|K2C5_HUMAN	R.QLDSIVGER.G	N	28.36	1015.53	1.8	508.773	2	33.33	F19:3436	2	229	237
83	122	P27169|PON1_HUMAN	K.ILLMDLNEEDPTVLELGITGSK.F	Y	84.18	2399.25	0.5	1200.63	2	70.1	F17:10537	2	85	106
83	122	P27169|PON1_HUMAN	K.IFFYDSENPPASEVLR.I	Y	83.27	1882.91	0.1	942.462	2	55.88	F17:8387	6	291	306
83	122	P27169|PON1_HUMAN	K.GIETGSEDLEILPNGLAFISSGLK.Y	Y	83.05	2459.28	1.9	1230.65	2	74.22	F17:11064	2	47	70
83	122	P27169|PON1_HUMAN	K.GIETGSEDLEILPNGLAFISSGLKYPGIK.S	Y	63.18	3017.6	0.8	1006.87	3	73.06	F17:10929	4	47	75
83	122	P27169|PON1_HUMAN	R.LNALREVQPVELPNC(+105.06)NLVK.G	Y	62.69	2253.23	-0.4	752.084	3	46.77	F17:6902	4	28	46	S-pyridylethylation
83	122	P27169|PON1_HUMAN	R.IQNILTEEPK.V	Y	60.49	1183.64	-1.8	592.829	2	38.29	F17:5435	1	307	316
83	122	P27169|PON1_HUMAN	R.EVQPVELPNC(+105.06)NLVK.G	Y	53.37	1685.88	-1.2	843.947	2	41.81	F17:6059	2	33	46	S-pyridylethylation
83	122	P27169|PON1_HUMAN	K.LLIGTVFHK.A	Y	46.8	1026.62	-2	514.317	2	45.53	F17:6705	4	341	349
83	122	P27169|PON1_HUMAN	K.SFNPNSPGK.I	Y	31.3	946.451	-1	474.232	2	18.99	F17:2009	2	76	84
28	29	P02790|HEMO_HUMAN	R.WKNFPSPVDAAFR.Q	Y	79.75	1533.77	1.8	767.895	2	49.46	F18:6268	10	90	102
28	29	P02790|HEMO_HUMAN	R.YYC(+105.06)FQGNQFLR.F	Y	60.61	1542.71	-0.3	515.243	3	44.61	F17:6559	6	198	208	S-pyridylethylation
28	29	P02790|HEMO_HUMAN	K.LLQDEFPGIPSPLDAAVEC(+105.06)HR.G	Y	55.03	2411.19	0.2	804.739	3	56.99	F16:9116	6	131	151	S-pyridylethylation
28	29	P02790|HEMO_HUMAN	K.SLGPNSC(+105.06)SANGPGLYLIHGPNLYC(+105.06)YSDVEKLNAAK.A	Y	53.01	3874.88	-7.3	1292.62	3	50.87	F16:8014	5	412	446	S-pyridylethylation
28	29	P02790|HEMO_HUMAN	K.NFPSPVDAAFR.Q	Y	50.5	1219.6	-1.7	610.806	2	48.99	F17:7278	6	92	102
28	29	P02790|HEMO_HUMAN	K.SGAQATWTELPWPHEK.V	Y	45.99	1836.88	-1.1	613.3	3	51.52	F16:8139	2	387	402
28	29	P02790|HEMO_HUMAN	R.GEC(+105.06)QAEGVLFFQGDREWFWDLATGTMKER.S	Y	45.67	3510.61	2	878.662	4	69.75	F17:10487	3	152	180	S-pyridylethylation
28	29	P02790|HEMO_HUMAN	K.RLEKEVGTPHGIILDSVDAAFIC(+105.06)PGSSR.L	Y	42.86	3071.59	3.6	768.907	4	51.3	F16:8096	2	344	371	S-pyridylethylation
28	29	P02790|HEMO_HUMAN	R.QGHNSVFLIK.G	Y	40.84	1141.62	-0.6	381.548	3	35.85	F17:4976	3	103	112
28	29	P02790|HEMO_HUMAN	K.VDGALC(+105.06)MEK.S	Y	37.59	1069.49	0.2	535.754	2	23.77	F16:2718	4	403	411	S-pyridylethylation
28	29	P02790|HEMO_HUMAN	R.LHIM(+15.99)AGR.R	Y	37.37	812.433	-1	407.223	2	23.83	F17:2837	4	372	378	Oxidation (M)
28	29	P02790|HEMO_HUMAN	R.LHIMAGR.R	Y	37.07	796.438	0.5	266.487	3	23.17	F18:2336	11	372	378
28	29	P02790|HEMO_HUMAN	R.DYFMPC(+105.06)PGR.G	Y	36.25	1189.5	-0.7	595.759	2	38.06	F16:5535	4	226	234	S-pyridylethylation
28	29	P02790|HEMO_HUMAN	K.SGAQATWTELPWPHEKVDGALC(+105.06)MEK.S	Y	36.01	2888.36	0.4	723.098	4	51.21	F16:8078	2	387	411	S-pyridylethylation
28	29	P02790|HEMO_HUMAN	R.RLWWLDLK.S	Y	35.94	1128.64	0.4	565.33	2	59.64	F16:9584	3	379	386
28	29	P02790|HEMO_HUMAN	R.DYFM(+15.99)PC(+105.06)PGR.G	Y	35.72	1205.5	0.9	603.758	2	38.02	F16:5528	2	226	234	Oxidation (M); S-pyridylethylation
28	29	P02790|HEMO_HUMAN	R.ELISER.W	Y	35.71	745.397	3	373.707	2	21.51	F18:2085	1	84	89
28	29	P02790|HEMO_HUMAN	R.QGHNSVFLIKGDK.V	Y	35.01	1441.77	-2.5	481.595	3	28.23	F16:3580	2	103	115
28	29	P02790|HEMO_HUMAN	K.VDGALC(+105.06)M(+15.99)EK.S	Y	33.44	1085.49	-0.6	543.751	2	23.63	F16:2694	2	403	411	S-pyridylethylation; Oxidation (M)
28	29	P02790|HEMO_HUMAN	R.DVRDYFM(+15.99)PC(+105.06)PGR.G	Y	32.74	1575.7	-2.8	526.238	3	43.97	F17:6452	10	223	234	Oxidation (M); S-pyridylethylation
28	29	P02790|HEMO_HUMAN	R.DVRDYFMPC(+105.06)PGR.G	Y	29.18	1559.7	-0.8	520.907	3	43.8	F16:6673	3	223	234	S-pyridylethylation
28	29	P02790|HEMO_HUMAN	R.FDPVRGEVPPRYPR.D	Y	27.6	1683.88	0	562.302	3	32.77	F16:4482	9	209	222
28	29	P02790|HEMO_HUMAN	K.SHKWDR.E	Y	25.48	827.404	1.3	276.809	3	8.67	F18:752	2	78	83
28	29	P02790|HEMO_HUMAN	K.ALPQPQNVTSLLGC(+105.06)TH	Y	23.54	1782.91	-0.7	595.31	3	50.6	F16:7964	1	447	462	S-pyridylethylation
28	29	P02790|HEMO_HUMAN	R.LWWLDLK.S	Y	23.33	972.543	-0.8	487.279	2	66.58	F18:8471	3	380	386
28	29	P02790|HEMO_HUMAN	K.LNAAK.A	N	20.29	515.307	1.1	258.661	2	7.53	F16:664	2	442	446
142	80	P07360|CO8G_HUMAN	R.VQEAHLTEDQIFYFPK.Y	Y	112.92	1963.97	2.3	982.994	2	52.47	F18:6678	2	169	184
142	80	P07360|CO8G_HUMAN	R.SLPVSDSVLSGFEQR.V	Y	102.68	1619.82	1.3	810.916	2	54.19	F18:6908	3	154	168
142	80	P07360|CO8G_HUMAN	R.RPASPISTIQPK.A	Y	65.53	1293.74	0.5	647.878	2	28.26	F18:3107	4	28	39
142	80	P07360|CO8G_HUMAN	K.YGFC(+105.06)EAADQFHVLDEVRR	Y	43.2	2259.05	0.6	754.025	3	48.93	F18:6193	2	185	202	S-pyridylethylation
119	187	P06310|KV206_HUMAN	R.FSGSGSGTDFTLK.I	N	104.63	1302.61	-0.2	652.312	2	37.8	F18:4594	4	87	99
119	187	P06310|KV206_HUMAN	R.DSGVPDRFSGSGSGTDFTLK.I	Y	86.06	2028.94	0.5	1015.48	2	42.87	F18:5350	2	80	99
119	187	P06310|KV206_HUMAN	R.LIYKVSNR.D	Y	62.35	991.581	-0.8	496.798	2	22.96	F18:2304	4	72	79
119	187	P06310|KV206_HUMAN	R.SSQSLVYSDGNTYLNWFQQRPGQSPR.R	Y	59.09	3014.43	0.6	1005.82	3	57.51	F18:7357	1	45	70
119	187	P06310|KV206_HUMAN	K.VEIKR	N	27.38	643.402	0.5	322.708	2	9.14	F18:821	2	129	133
112	104	P02747|C1QC_HUMAN	R.FNAVLTNPQGDYDTSTGK.F	Y	118.75	1926.9	0.1	964.455	2	39.98	F18:4934	2	140	157
112	104	P02747|C1QC_HUMAN	R.QTHQPPAPNSLIR.F	Y	73.33	1457.77	-0.5	729.894	2	29.56	F18:3315	4	127	139
112	104	P02747|C1QC_HUMAN	K.TNQVNSGGVLLR.L	Y	63.43	1256.68	2	629.35	2	33.33	F18:3917	2	199	210
112	104	P02747|C1QC_HUMAN	K.FQSVFTVTR.Q	Y	60.2	1083.57	-1.1	542.792	2	43.99	F18:5510	4	118	126
51	1842	O43866|CD5L_HUMAN	R.LVGGDNLC(+105.06)SGR.L	Y	67.39	1194.58	-1.7	598.297	2	24.49	F17:2967	4	246	256	S-pyridylethylation
51	1842	O43866|CD5L_HUMAN	R.ELGC(+105.06)GAASGTPSGILYEPPAEKEQK.V	Y	63.65	2636.28	-0.1	879.767	3	37.9	F17:5361	4	64	88	S-pyridylethylation
51	1842	O43866|CD5L_HUMAN	R.ELGC(+105.06)GAASGTPSGILYEPPAEK.E	Y	58.2	2251.08	-2.5	751.366	3	41.34	F17:5975	1	64	85	S-pyridylethylation
51	1842	O43866|CD5L_HUMAN	R.C(+105.06)SGEEQSLEQC(+105.06)QHR.F	Y	57.85	1842.78	-2.1	922.394	2	16.95	F17:1708	6	315	328	S-pyridylethylation
51	1842	O43866|CD5L_HUMAN	R.EATLQDC(+105.06)PSGPWGK.N	Y	56.35	1592.73	0.1	797.372	2	35.92	F17:4988	4	212	225	S-pyridylethylation
51	1842	O43866|CD5L_HUMAN	K.GVWGSVC(+105.06)DDNWGEKEDQVVC(+105.06)K.Q	Y	52.33	2562.13	0.4	855.051	3	41.46	F17:5997	2	263	283	S-pyridylethylation
51	1842	O43866|CD5L_HUMAN	K.GQWGTVC(+105.06)DDGWDIKDVAVLC(+105.06)R.E	Y	49.32	2545.19	-0.5	637.304	4	53.36	F17:7973	2	43	63	S-pyridylethylation
51	1842	O43866|CD5L_HUMAN	R.IWLDNVR.C	Y	47.17	914.497	-0.4	458.256	2	43.53	F18:5446	6	308	314
51	1842	O43866|CD5L_HUMAN	R.KC(+105.06)YGPGVGR.I	Y	45.15	1040.52	0	347.848	3	9.36	F17:927	3	299	307	S-pyridylethylation
51	1842	O43866|CD5L_HUMAN	R.LVGGLHR.C	Y	34.78	750.45	0.5	376.233	2	19.03	F17:2015	6	26	32
51	1842	O43866|CD5L_HUMAN	K.SLSPSFRDR.K	Y	34.44	1063.54	-1.4	532.777	2	24.91	F18:2605	7	290	298
51	1842	O43866|CD5L_HUMAN	R.LEVLHK.G	Y	33.43	737.443	1	369.729	2	20.63	F17:2278	4	257	262
51	1842	O43866|CD5L_HUMAN	K.SLSPSFR.D	Y	32.93	792.413	0.5	397.214	2	30.26	F17:3973	3	290	296
51	1842	O43866|CD5L_HUMAN	K.NTC(+105.06)NHDEDTWVEC(+105.06)EDPFDLR.L	Y	32.47	2647.07	-1	662.775	4	47.93	F17:7090	1	226	245	S-pyridylethylation
51	1842	O43866|CD5L_HUMAN	R.C(+105.06)EGRVEVEQK.G	Y	26.3	1280.62	-1.1	641.316	2	9.24	F19:775	5	33	42	S-pyridylethylation
51	1842	O43866|CD5L_HUMAN	K.C(+105.06)YGPGVGR.I	Y	23.23	912.428	0	457.221	2	17.08	F17:1728	3	300	307	S-pyridylethylation
51	1842	O43866|CD5L_HUMAN	R.C(+105.06)NKHAYGR.K	Y	21.98	1052.5	0.6	527.256	2	7.37	F17:661	4	191	198	S-pyridylethylation
69	34371	P06727|APOA4_HUMAN	K.KLVPFATELHER.L	Y	70.19	1438.79	-1.2	480.604	3	37.66	F18:4572	1	79	90
69	34371	P06727|APOA4_HUMAN	K.SELTQQLNALFQDKLGEVNTYAGDLQK.K	Y	69.93	3022.52	3.7	1008.52	3	69.7	F18:8816	4	52	78
69	34371	P06727|APOA4_HUMAN	K.IDQNVEELKGR.L	Y	67.83	1299.68	0.5	650.847	2	25.16	F18:2641	8	190	200
69	34371	P06727|APOA4_HUMAN	R.LLPHANEVSQK.I	Y	64.44	1234.67	1.1	618.341	2	21.76	F18:2123	2	113	123
69	34371	P06727|APOA4_HUMAN	K.IDQTVEELR.R	Y	61	1101.57	1.1	551.791	2	31.27	F18:3590	2	212	220
69	34371	P06727|APOA4_HUMAN	R.LTPYADEFKVKIDQTVEELR.R	Y	56	2393.25	0.5	798.757	3	60.22	F18:7710	2	201	220
69	34371	P06727|APOA4_HUMAN	R.ISASAEELRQR.L	Y	52.19	1258.66	-0.4	630.338	2	23.54	F18:2392	5	256	266
69	34371	P06727|APOA4_HUMAN	R.TQVNTQAEQLRR.Q	Y	45.79	1442.76	-0.7	722.386	2	20.29	F18:1916	4	144	155
69	34371	P06727|APOA4_HUMAN	R.RQLTPYAQR.M	Y	43.4	1131.61	-2.8	566.813	2	19.53	F18:1810	2	155	163
69	34371	P06727|APOA4_HUMAN	R.QLTPYAQR.M	Y	31.1	975.514	-1.1	488.764	2	24.43	F18:2531	2	156	163
69	34371	P06727|APOA4_HUMAN	R.SLAPYAQDTQEKLNHQLEGLTFQMK.K	Y	27.99	2889.43	1.1	964.153	3	55.99	F17:8404	1	222	246
48	71	P01859|IGHG2_HUMAN	K.VSNKGLPAPIEK.T	Y	72.76	1251.72	-0.4	626.866	2	26.58	F18:2860	12	202	213
48	71	P01859|IGHG2_HUMAN	K.TTPPMLDSDGSFFLYSK.L	Y	72.58	1904.89	0.4	953.451	2	60.3	F17:9093	9	272	288
48	71	P01859|IGHG2_HUMAN	K.NQVSLTC(+105.06)LVK.G	N	58.09	1208.66	1	605.337	2	37.86	F19:3983	8	240	249	S-pyridylethylation
48	71	P01859|IGHG2_HUMAN	K.GPSVFPLAPC(+105.06)SR.S	N	57.24	1334.68	-0.8	668.347	2	41.72	F16:6264	8	5	16	S-pyridylethylation
48	71	P01859|IGHG2_HUMAN	R.STSESTAALGC(+105.06)LVK.D	N	54.6	1470.74	-0.8	736.376	2	37.07	F17:5198	8	17	30	S-pyridylethylation
48	71	P01859|IGHG2_HUMAN	R.VVSVLTVVHQDWLNGKEYK.C	Y	52.9	2213.18	0.3	738.736	3	55.84	F17:8380	6	181	199
48	71	P01859|IGHG2_HUMAN	K.GLPAPIEKTISK.T	Y	52.35	1252.74	-0.1	627.377	2	36.71	F17:5132	3	206	217
48	71	P01859|IGHG2_HUMAN	K.VDKTVERK.C	Y	36.49	973.556	-1.5	487.784	2	7.34	F17:657	4	94	101
48	71	P01859|IGHG2_HUMAN	K.LTVDKSR.W	N	35.56	817.466	1.4	409.741	2	7.91	F17:745	4	289	295
48	71	P01859|IGHG2_HUMAN	K.DTLMISR.T	N	35.29	834.427	0.8	418.221	2	32.34	F16:4392	3	128	134
48	71	P01859|IGHG2_HUMAN	K.DTLM(+15.99)ISR.T	N	34.73	850.422	0	426.218	2	27.8	F17:3523	5	128	134	Oxidation (M)
48	71	P01859|IGHG2_HUMAN	K.VDKTVER.K	Y	34.64	845.461	1.5	423.738	2	4.96	F17:420	2	94	100
48	71	P01859|IGHG2_HUMAN	K.GLPAPIEK.T	Y	34.39	823.48	2.1	412.748	2	30.41	F17:4003	6	206	213
70	124	P02749|APOH_HUMAN	K.ATVVYQGER.V	Y	69.57	1021.52	1.2	511.767	2	21.67	F18:2112	5	271	279
70	124	P02749|APOH_HUMAN	R.TC(+105.06)PKPDDLPFSTVVPLK.T	Y	65.9	1961.03	-0.4	654.685	3	49.16	F17:7304	2	22	38	S-pyridylethylation
70	124	P02749|APOH_HUMAN	K.KATVVYQGER.V	Y	57.52	1149.61	0.2	575.814	2	17.26	F17:1753	2	270	279
70	124	P02749|APOH_HUMAN	K.ATFGC(+105.06)HDGYSLDGPEEIEC(+105.06)TK.L	Y	50.99	2481.06	0.1	828.028	3	37.31	F17:5243	3	230	250	S-pyridylethylation
70	124	P02749|APOH_HUMAN	K.C(+105.06)TEEGKWSPELPVC(+105.06)APIIC(+105.06)PPPSIPTFATLR.V	Y	50.12	3666.84	1.1	917.719	4	59.11	F17:8911	3	124	154	S-pyridylethylation
70	124	P02749|APOH_HUMAN	K.C(+105.06)SYTEDAQC(+105.06)IDGTIEVPK.C	Y	48.57	2180.98	-0.4	727.999	3	39.72	F17:5687	1	307	324	S-pyridylethylation
70	124	P02749|APOH_HUMAN	R.KFIC(+105.06)PLTGLWPINTLK.C	Y	47.4	1948.1	0.1	650.374	3	61.78	F17:9317	2	63	78	S-pyridylethylation
70	124	P02749|APOH_HUMAN	K.WSPELPVC(+105.06)APIIC(+105.06)PPPSIPTFATLR.V	Y	44.3	2914.53	1.1	972.518	3	64.93	F17:9796	3	130	154	S-pyridylethylation
70	124	P02749|APOH_HUMAN	K.TFYEPGEEITYSC(+105.06)KPGYVSR.G	Y	42.55	2430.12	-0.3	811.047	3	40.04	F17:5744	4	39	58	S-pyridylethylation
70	124	P02749|APOH_HUMAN	R.TC(+105.06)PKPDDLPFSTVVPLKTFYEPGEEITYSC(+105.06)KPGYVSR.G	Y	41.8	4373.14	-1	1094.29	4	54.85	F17:8216	2	22	58	S-pyridylethylation
70	124	P02749|APOH_HUMAN	K.FIC(+105.06)PLTGLWPINTLK.C	Y	38.71	1820.01	-1.3	607.675	3	67.04	F17:10111	1	64	78	S-pyridylethylation
70	124	P02749|APOH_HUMAN	K.DKATFGC(+105.06)HDGYSLDGPEEIEC(+105.06)TK.L	Y	32.4	2724.18	0.3	682.053	4	36.2	F17:5043	2	228	250	S-pyridylethylation
71	34372	P35858|ALS_HUMAN	R.LAELPADALGPLQR.A	Y	73.95	1462.81	0.1	732.415	2	52.35	F16:8288	3	470	483
71	34372	P35858|ALS_HUMAN	R.SLALGTFAHTPALASLGLSNNR.L	Y	70.58	2210.18	-0.2	1106.1	2	59.35	F16:9532	1	136	157
71	34372	P35858|ALS_HUMAN	K.ALRDFALQNPSAVPR.F	Y	68	1653.89	0.1	827.955	2	41.54	F16:6229	4	546	560
71	34372	P35858|ALS_HUMAN	R.DLSEAHFAPC(+105.06)	Y	59.18	1193.52	0.2	597.766	2	36.17	F16:5156	4	596	605	S-pyridylethylation
71	34372	P35858|ALS_HUMAN	R.TFKDLHFLEELQLGHNR.I	Y	56.46	2096.08	-1.9	525.026	4	53.5	F16:8497	2	309	325
71	34372	P35858|ALS_HUMAN	K.ANVFVQLPR.L	Y	52.96	1042.59	-0.7	522.303	2	45.85	F16:7070	2	235	243
71	34372	P35858|ALS_HUMAN	R.SFEGLGQLEVLTLDHNQLQEVK.A	Y	44.05	2496.29	0	833.102	3	62.62	F16:10078	3	333	354
71	34372	P35858|ALS_HUMAN	R.LWLEGNPWDC(+105.06)GC(+105.06)PLK.A	Y	33.69	1939.91	-1.4	647.643	3	51.17	F16:8070	4	531	545	S-pyridylethylation
71	34372	P35858|ALS_HUMAN	R.DFALQNPSAVPR.F	Y	23.69	1313.67	0.7	657.844	2	42.03	F16:6326	2	549	560
195	169	P80748|LV302_HUMAN	R.FSGSNSGNTATLTISR.V	Y	113.2	1611.79	1.2	806.901	2	33.73	F18:3979	3	60	75
195	169	P80748|LV302_HUMAN	YVLTQPPSVSVAPGETAR.L	Y	91.98	1870.98	1.7	936.498	2	43.61	F18:5457	2	1	18
195	169	P80748|LV302_HUMAN	K.LTVLSQPK	Y	67.04	884.533	0.2	443.274	2	29.62	F18:3327	4	104	111
64	53	O75636|FCN3_HUMAN	R.YAVSEAAAHK.Y	Y	74	1045.52	-0.6	523.766	2	17.71	F17:1819	4	267	276
64	53	O75636|FCN3_HUMAN	K.MGPKGEPGDPVNLLR.C	Y	73.68	1578.82	-0.9	790.416	2	42.11	F17:6113	3	71	85
64	53	O75636|FCN3_HUMAN	K.YGIDWASGR.G	Y	61.04	1023.48	-1.6	512.745	2	42.38	F17:6159	2	277	285
64	53	O75636|FCN3_HUMAN	R.ELLSQGATLSGWYHLC(+105.06)LPEGR.A	Y	54.22	2434.21	0.6	812.411	3	58.29	F17:8784	2	95	115	S-pyridylethylation
64	53	O75636|FCN3_HUMAN	R.ALPVFC(+105.06)DMDTEGGGWLVFQR.R	Y	53.65	2345.1	1.2	782.707	3	65.5	F19:7221	7	116	135	S-pyridylethylation
64	53	O75636|FCN3_HUMAN	K.M(+15.99)GPKGEPGDPVNLLR.C	Y	47.31	1594.81	-1.1	532.611	3	40.24	F17:5779	4	71	85	Oxidation (M)
64	53	O75636|FCN3_HUMAN	R.QDGSVDFFR.S	Y	47.17	1069.48	-1.3	535.748	2	44.01	F17:6458	2	137	145
64	53	O75636|FCN3_HUMAN	R.RQDGSVDFFR.S	Y	47.05	1225.58	-2.1	613.798	2	38.38	F17:5450	4	136	145
64	53	O75636|FCN3_HUMAN	R.GVGHPYRR.V	Y	31.62	940.499	3.5	471.259	2	8.32	F18:714	6	286	293
64	53	O75636|FCN3_HUMAN	R.C(+105.06)QEGPR.N	Y	31.34	793.354	-1.7	397.684	2	7.67	F17:703	3	86	91	S-pyridylethylation
64	53	O75636|FCN3_HUMAN	R.LLGEVDHYQLALGK.F	Y	20.41	1554.84	-1.5	519.287	3	47.03	F17:6942	2	200	213
65	67	P01042|KNG1_HUMAN	K.YNSQNQSNNQFVLYR.I	Y	80.64	1873.87	-2	937.941	2	41.13	F19:4376	6	44	58
65	67	P01042|KNG1_HUMAN	K.YFIDFVAR.E	Y	60.48	1029.53	-1.2	515.771	2	54.95	F17:8233	2	317	324
65	67	P01042|KNG1_HUMAN	R.IASFSQNC(+105.06)DIYPGKDFVQPPTK.I	Y	57.23	2559.25	-0.5	854.089	3	43.94	F17:6446	4	241	262	S-pyridylethylation
65	67	P01042|KNG1_HUMAN	K.KYFIDFVAR.E	Y	54.64	1157.62	0.9	579.819	2	48.95	F17:7270	2	316	324
65	67	P01042|KNG1_HUMAN	K.AATGEC(+105.06)TATVGKR.S	Y	50.22	1368.68	-0.8	685.348	2	8.86	F16:853	10	102	114	S-pyridylethylation
65	67	P01042|KNG1_HUMAN	K.TWQDC(+105.06)EYKDAAK.A	Y	48.09	1561.69	-1.4	781.85	2	24.91	F17:3035	3	90	101	S-pyridylethylation
65	67	P01042|KNG1_HUMAN	K.YEIKEGDC(+105.06)PVQSGK.T	Y	44.94	1656.78	-1.3	553.267	3	25.12	F17:3069	2	76	89	S-pyridylethylation
65	67	P01042|KNG1_HUMAN	R.VQVVAGK.K	Y	28.09	699.428	1.6	350.722	2	9.75	F17:996	2	309	315
65	67	P01042|KNG1_HUMAN	R.VQVVAGKK.Y	Y	25.9	827.523	0.1	414.769	2	7.83	F17:734	1	309	316
65	67	P01042|KNG1_HUMAN	K.IC(+105.06)VGC(+105.06)PR.D	Y	21.74	956.472	0.2	319.832	3	19.14	F17:2032	4	263	269	S-pyridylethylation
96	228	O14791|APOL1_HUMAN	R.VTEPISAESGEQVER.V	Y	86.83	1629.78	-0.1	815.899	2	30.33	F17:3986	2	306	320
96	228	O14791|APOL1_HUMAN	R.ANLQSVPHASASRPR.V	Y	68.76	1589.84	0	795.927	2	21.2	F17:2375	8	291	305
96	228	O14791|APOL1_HUMAN	R.VTEPISAESGEQVERVNEPSILEMSR.G	Y	59.95	2885.41	0.8	962.811	3	48.86	F17:7255	2	306	331
96	228	O14791|APOL1_HUMAN	R.VTEPISAESGEQVERVNEPSILEM(+15.99)SR.G	Y	57.11	2901.4	0.8	968.142	3	48.86	F17:7254	2	306	331	Oxidation (M)
96	228	O14791|APOL1_HUMAN	R.VNEPSILEM(+15.99)SR.G	Y	56.19	1289.63	0.4	645.822	2	45.27	F17:6664	2	321	331	Oxidation (M)
96	228	O14791|APOL1_HUMAN	K.LTDVAPVSFFLVLDVVYLVYESK.H	Y	55.08	2615.41	2.2	872.814	3	99.06	F19:10213	2	335	357
96	228	O14791|APOL1_HUMAN	K.ILQADQEL	Y	32.61	928.486	-0.8	465.25	2	40.72	F20:3341	2	391	398
96	228	O14791|APOL1_HUMAN	R.VQQNVPSGTDTGDPQSKPLGDWAAGTMDPESSIFIEDAIKYFK.E	Y	24.56	4639.21	3.9	1160.81	4	74.85	F17:11145	2	34	76
68	28	P43652|AFAM_HUMAN	K.LKHELTDEELQSLFTNFANVVDK.C	Y	68.8	2689.36	0.6	897.461	3	70.19	F16:11253	4	557	579
68	28	P43652|AFAM_HUMAN	K.IAPQLSTEELVSLGEK.M	Y	63.24	1712.92	-0.9	857.466	2	53.78	F16:8545	2	438	453
68	28	P43652|AFAM_HUMAN	K.AESPEVC(+105.06)FNEESPK.I	Y	56.1	1669.73	-1.2	835.871	2	32.19	F16:4363	3	583	596	S-pyridylethylation
[truncated: 10,077 more rows]
